# Supplementary material for: The effect of a constraint on the maximum number of controls matched to each treated subject on the performance of full matching on the propensity score when estimating risk differences
Source: PubMed Central journal article supplement — Stat Med. 2020 Oct 7;40(1):101–18. doi: 10.1002/sim.8764 (PMC7821239; doi:10.1002/sim.8764), 2020-10-07

Figure A1. Size of matched sample (no calipers)

Multiplier = 1

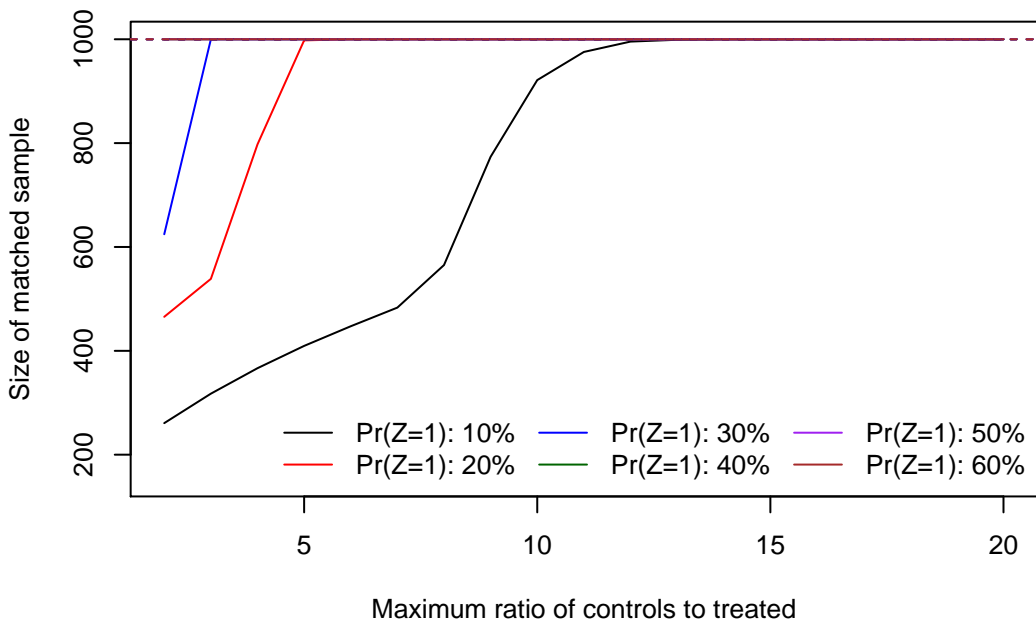

Multiplier = 2

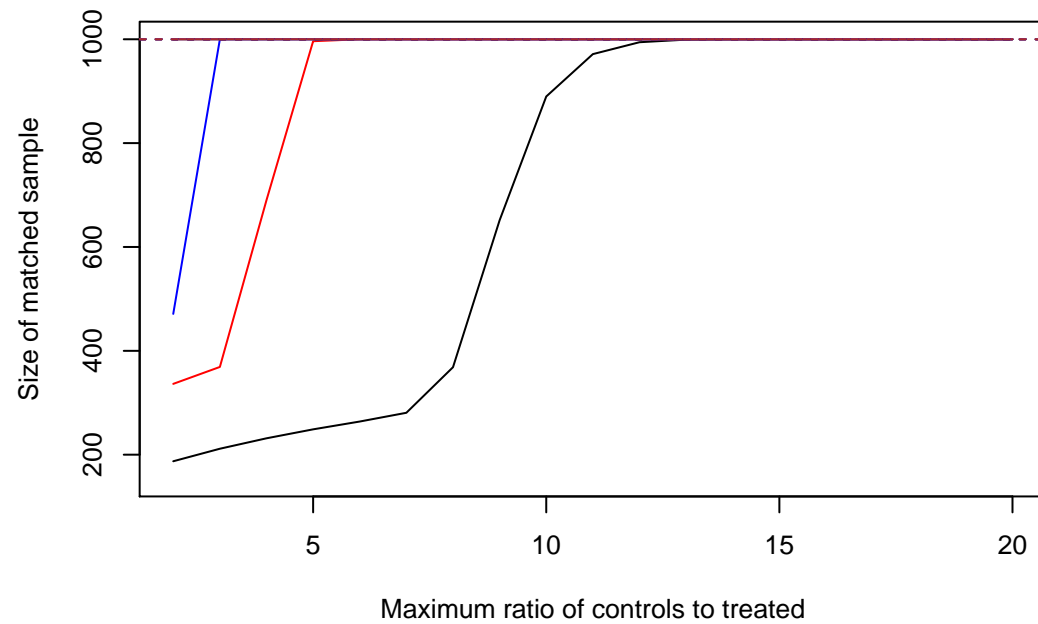

Multiplier = 3

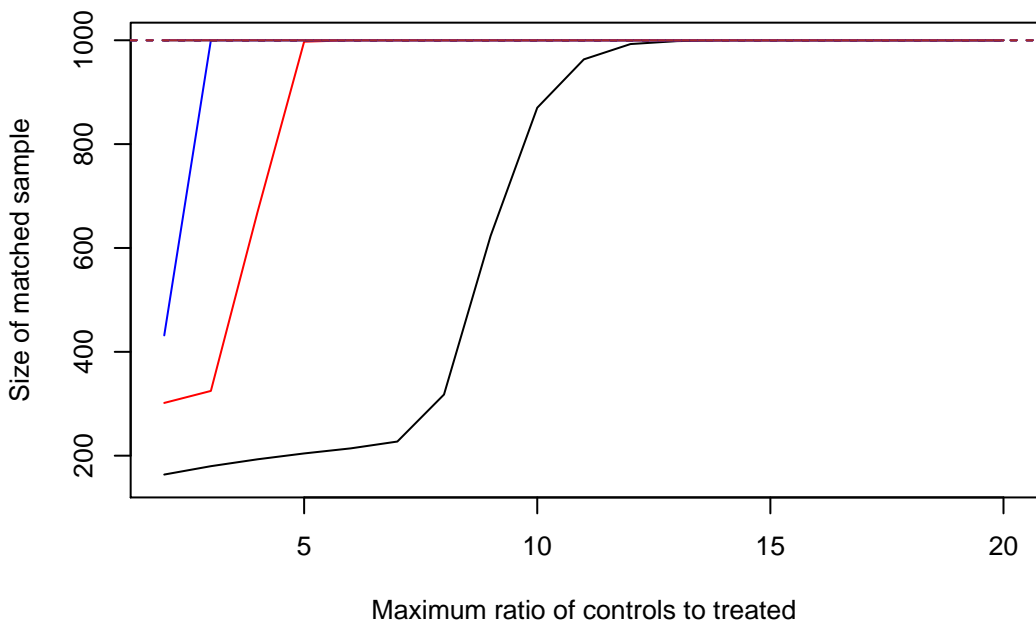

Multiplier = 4

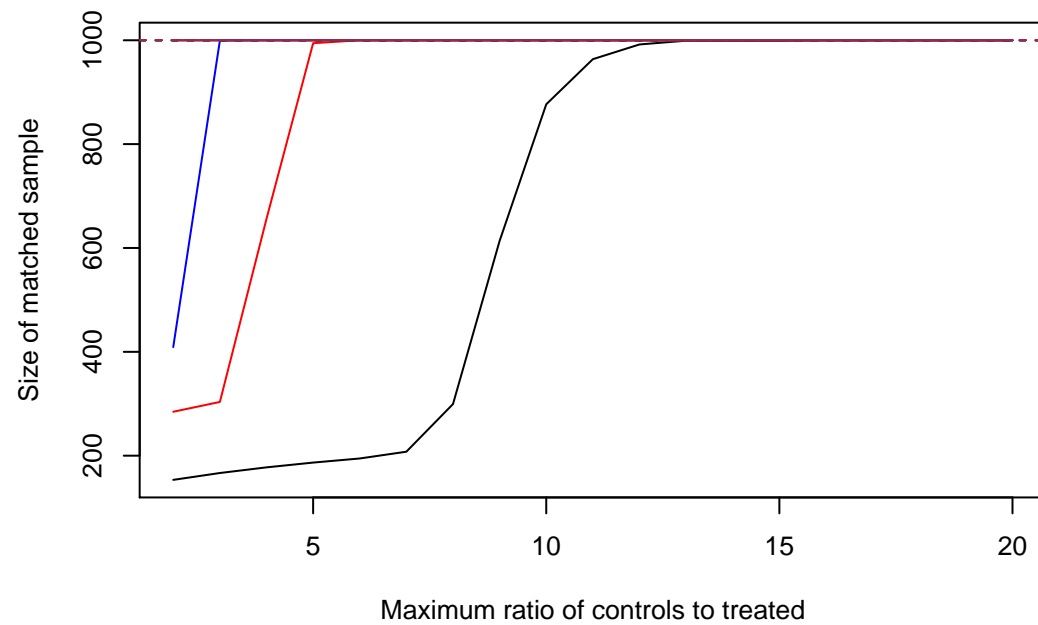

Figure A2. Size of matched sample (with calipers)

Multiplier = 1

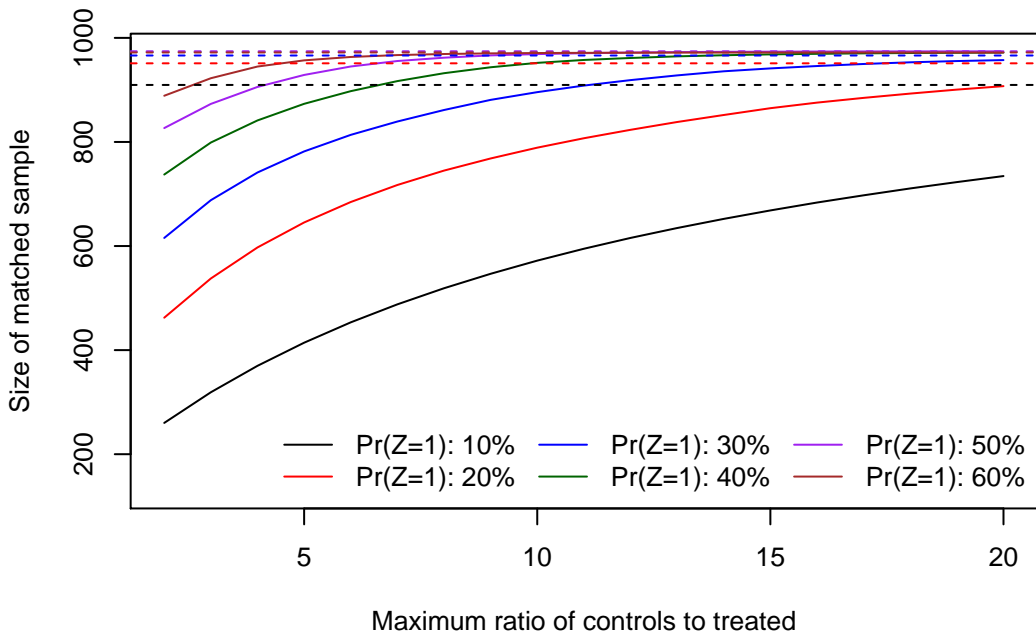

Multiplier = 2

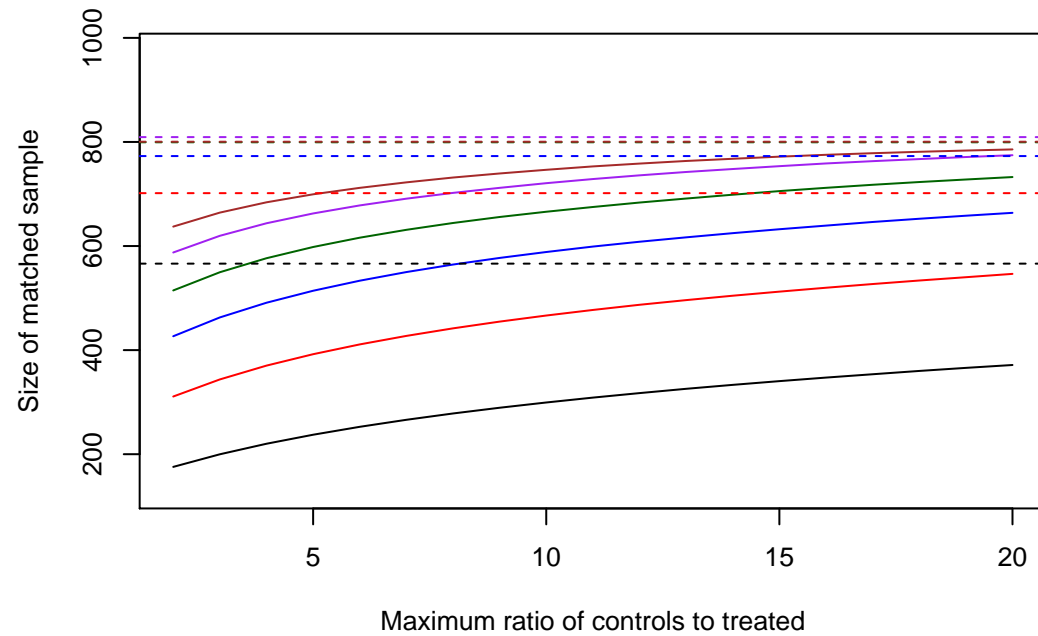

Multiplier = 3

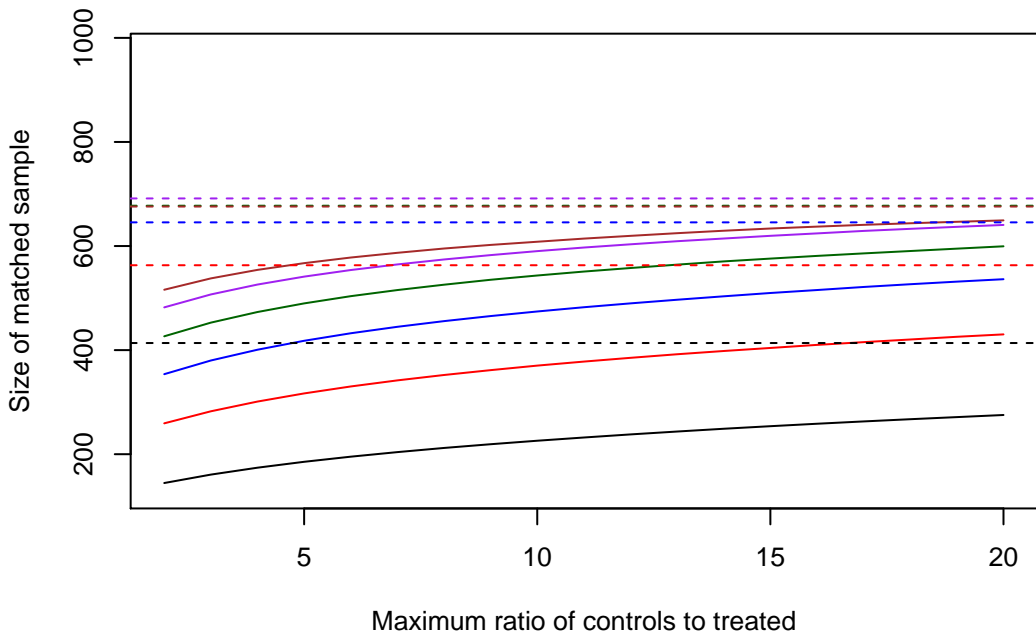

Multiplier = 4

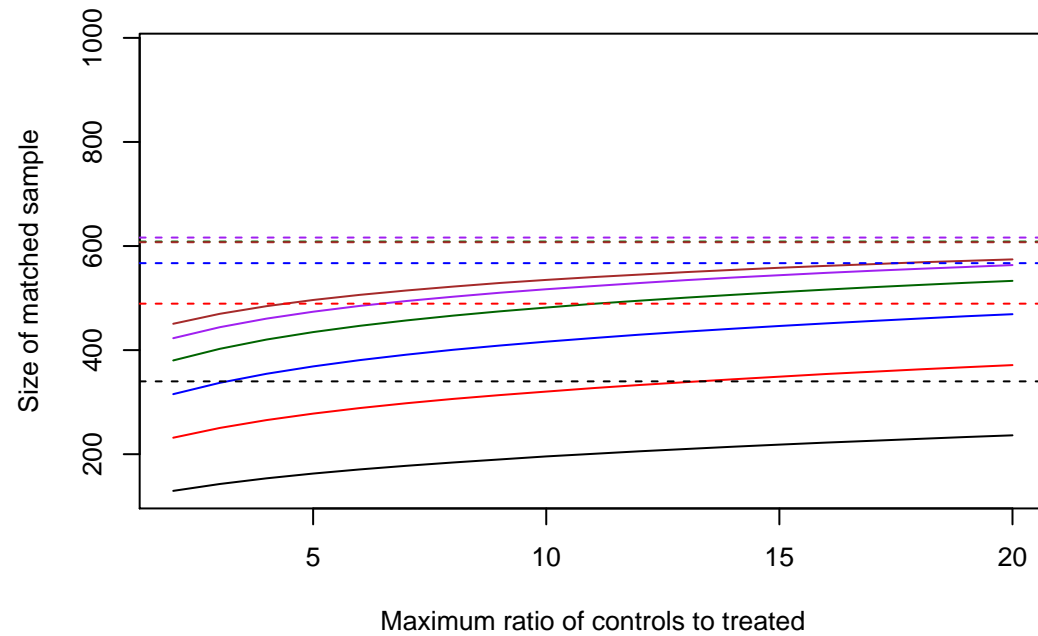

Figure A3. Maximum weight after matching (no calipers)

Multiplier = 1

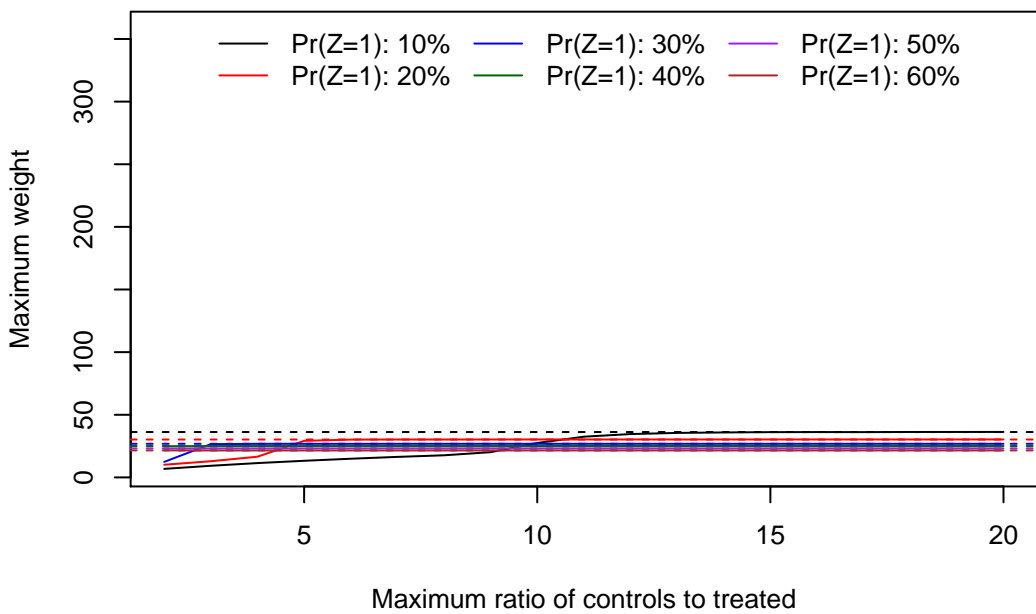

Multiplier = 2

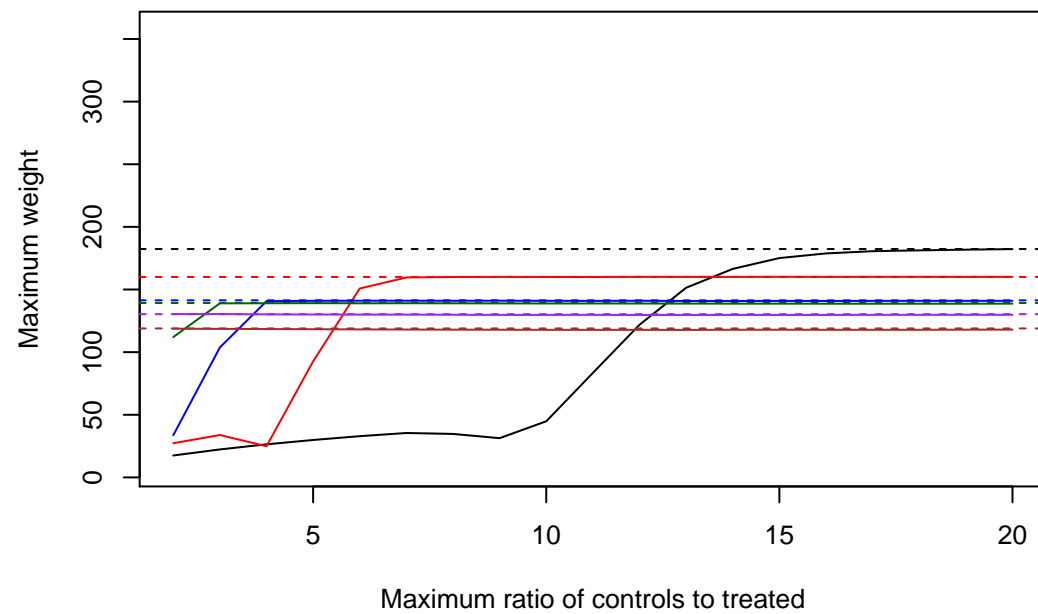

Multiplier = 3

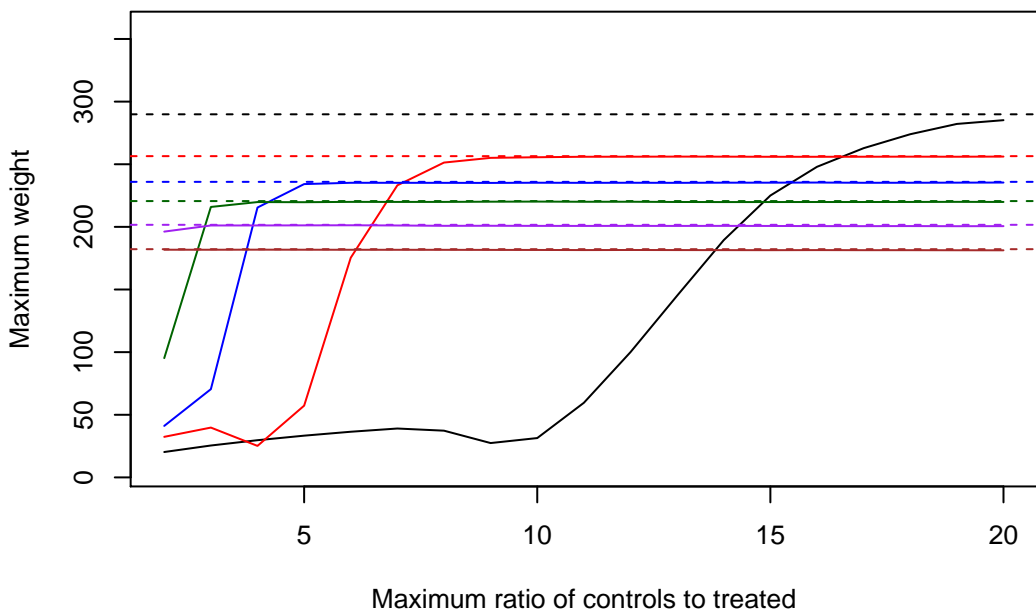

Multiplier = 4

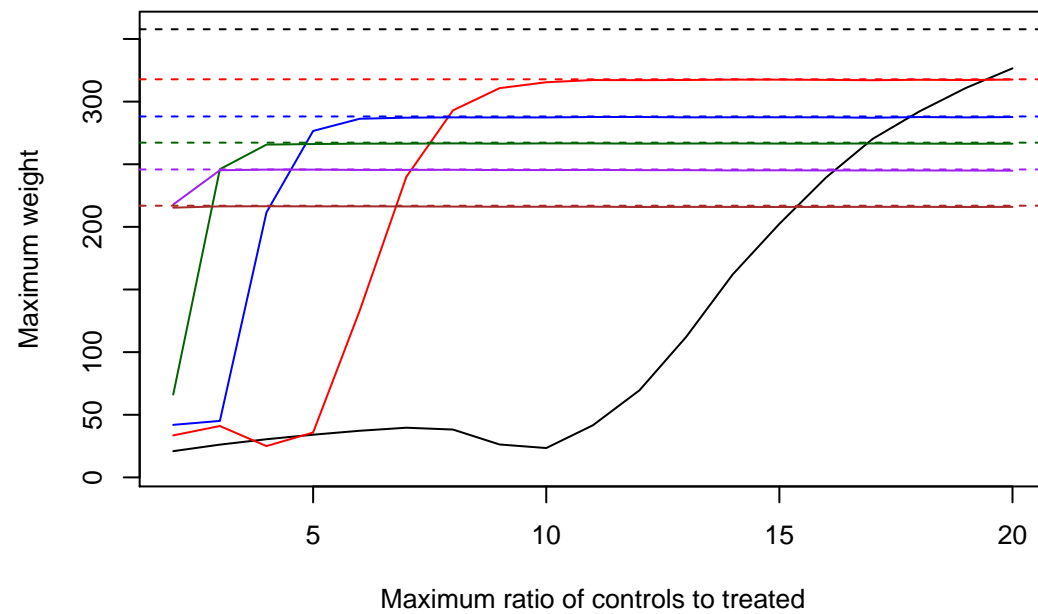

Figure A4. Maximum weight after matching (with calipers)

Multiplier = 1

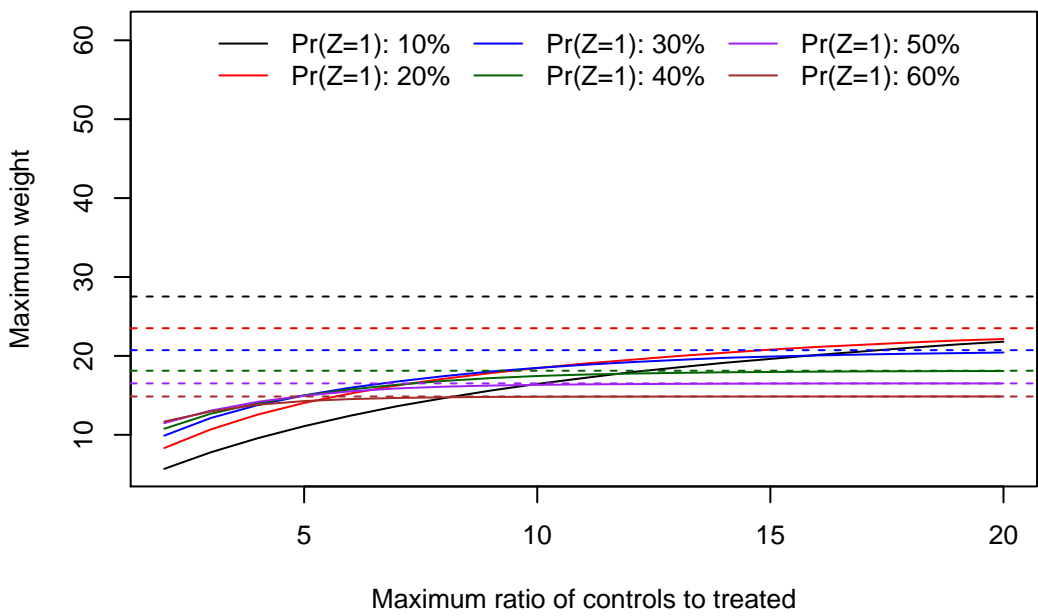

Multiplier = 2

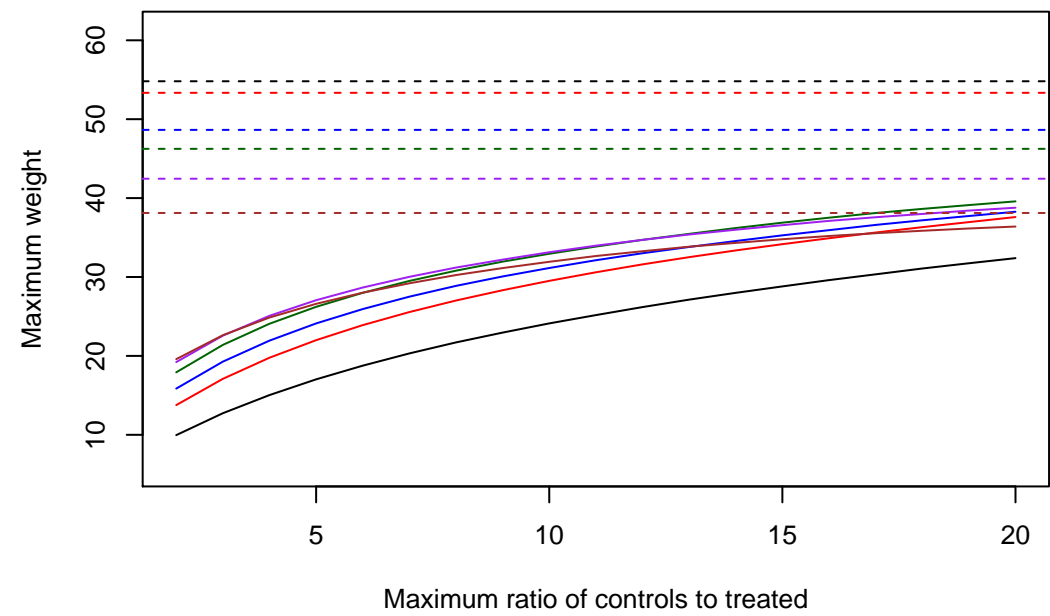

Multiplier = 3

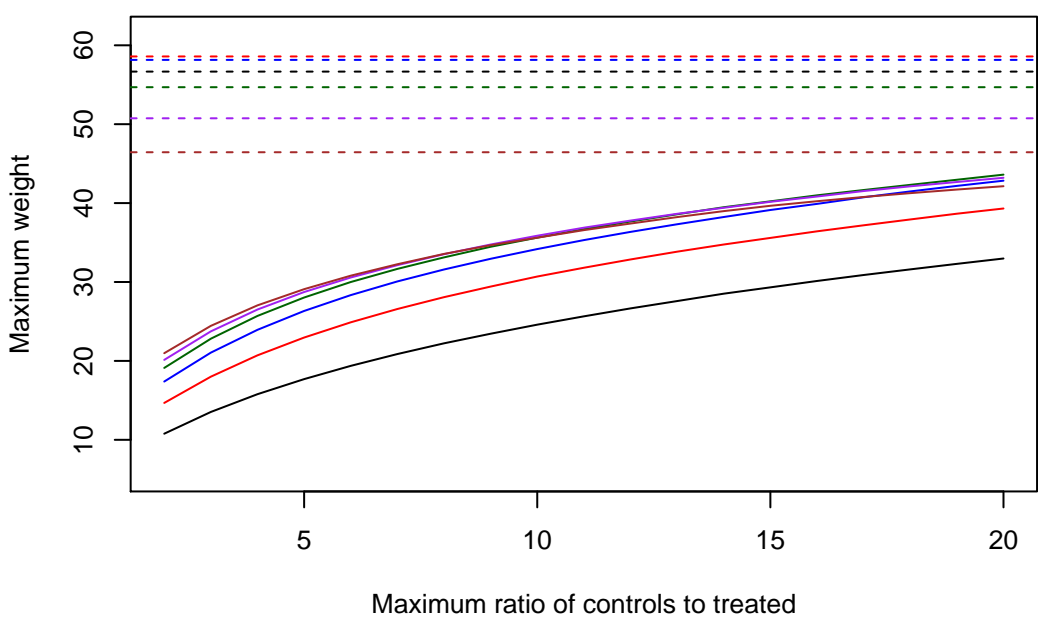

Multiplier = 4

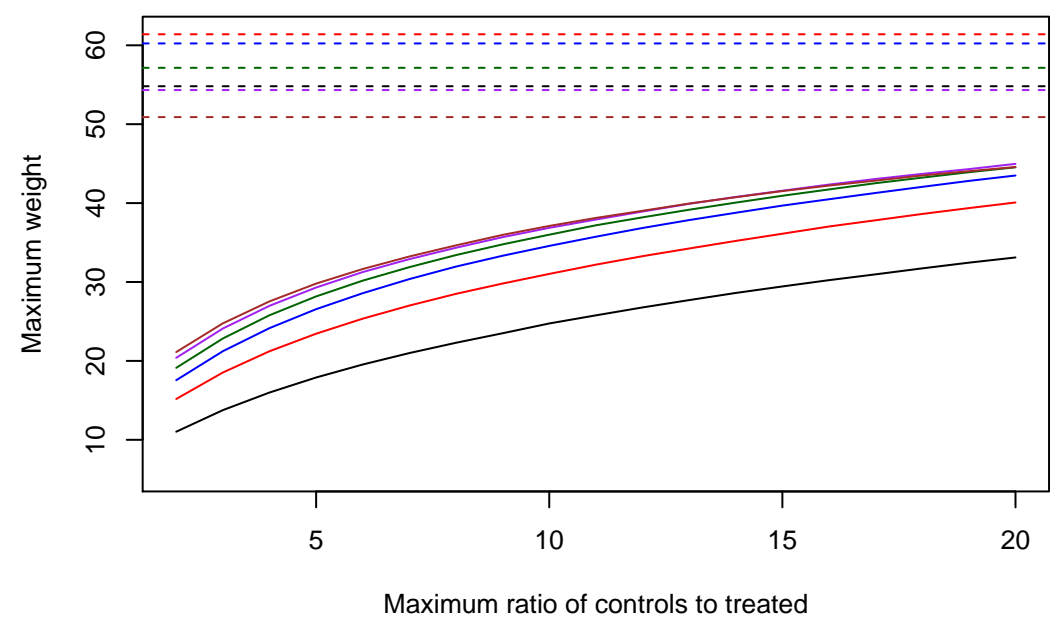

Figure A5. Maximum number of controls per treated subject after matching (no calipers)

Multiplier = 1

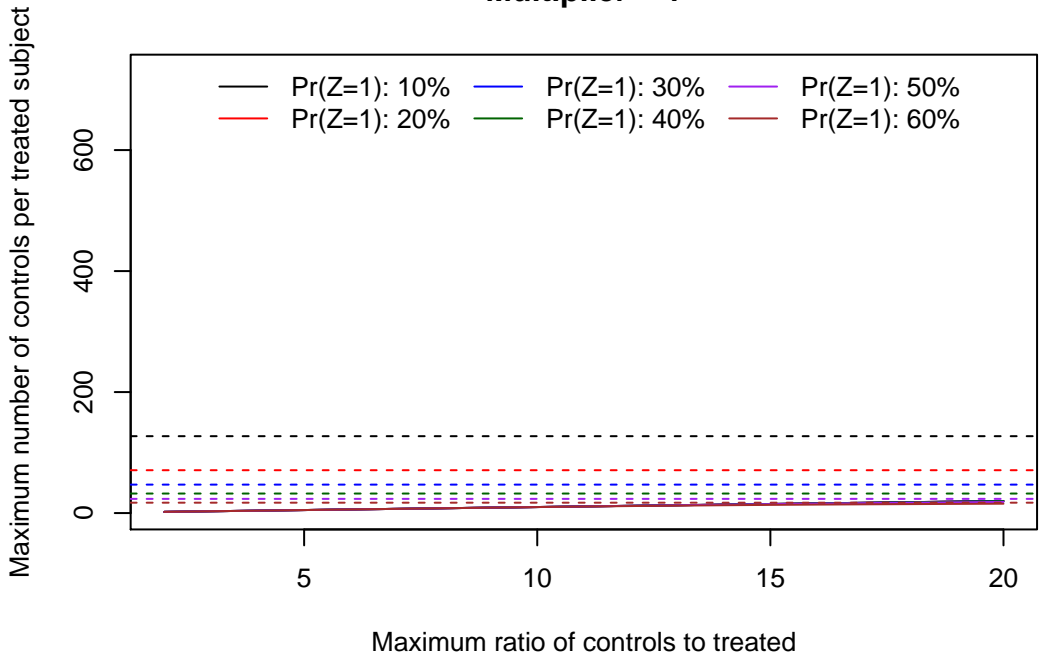

Multiplier = 2

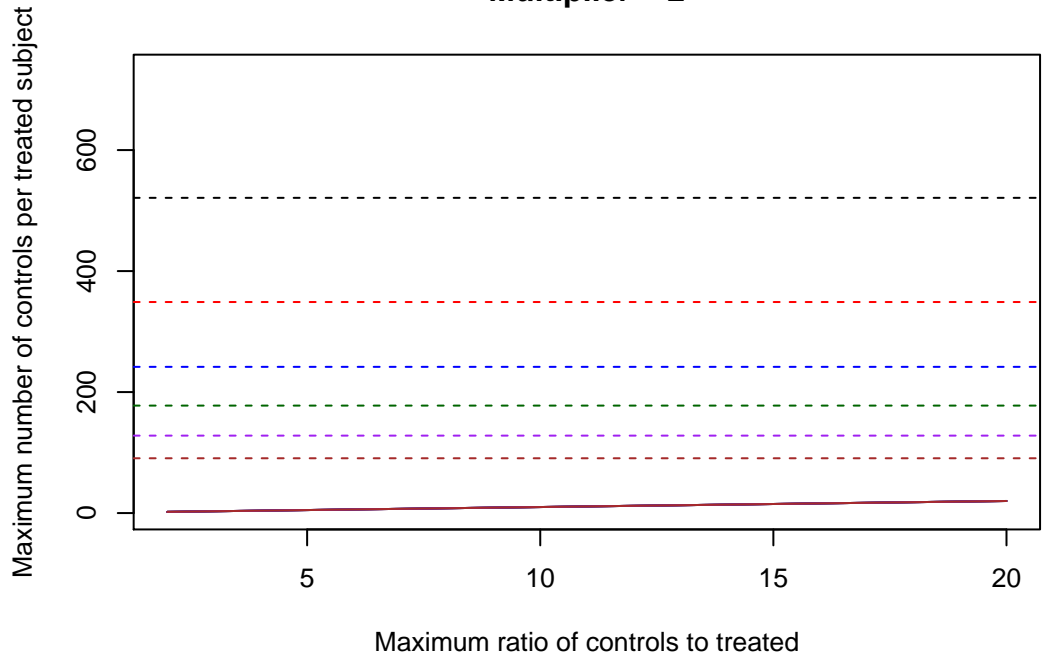

Multiplier = 3

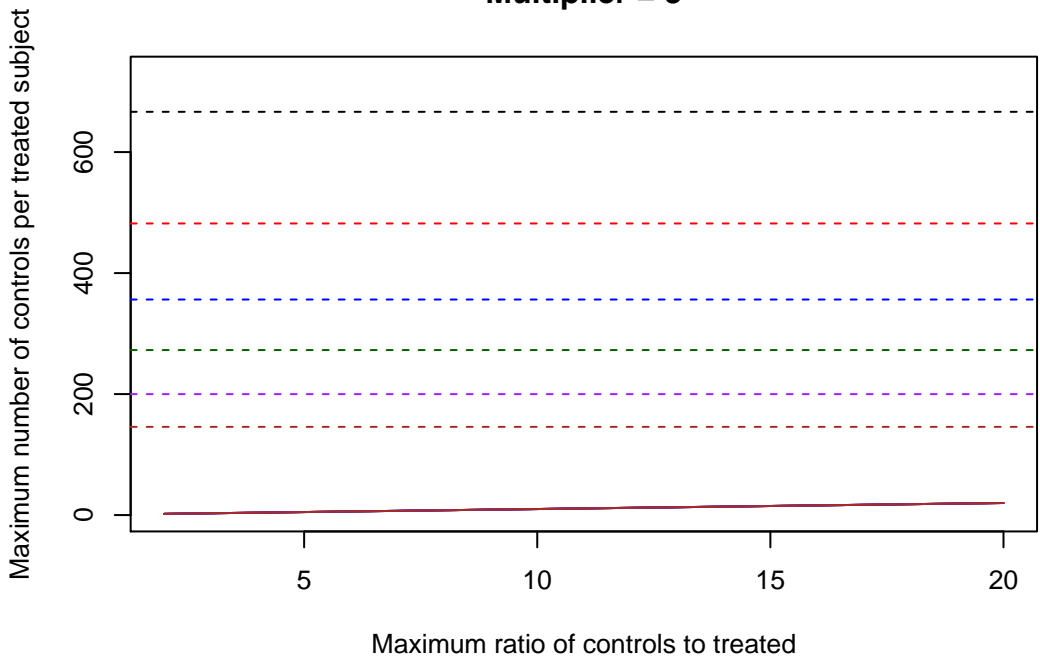

Multiplier = 4

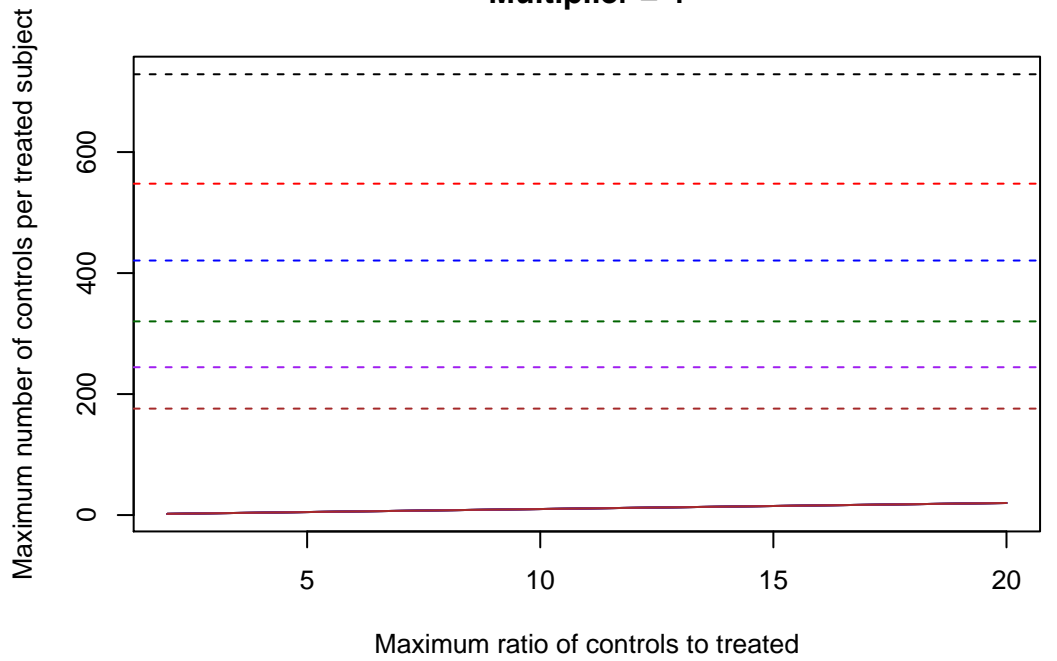

Figure A6. Maximum number of controls per treated subject after matching (with calipers)

Multiplier = 1

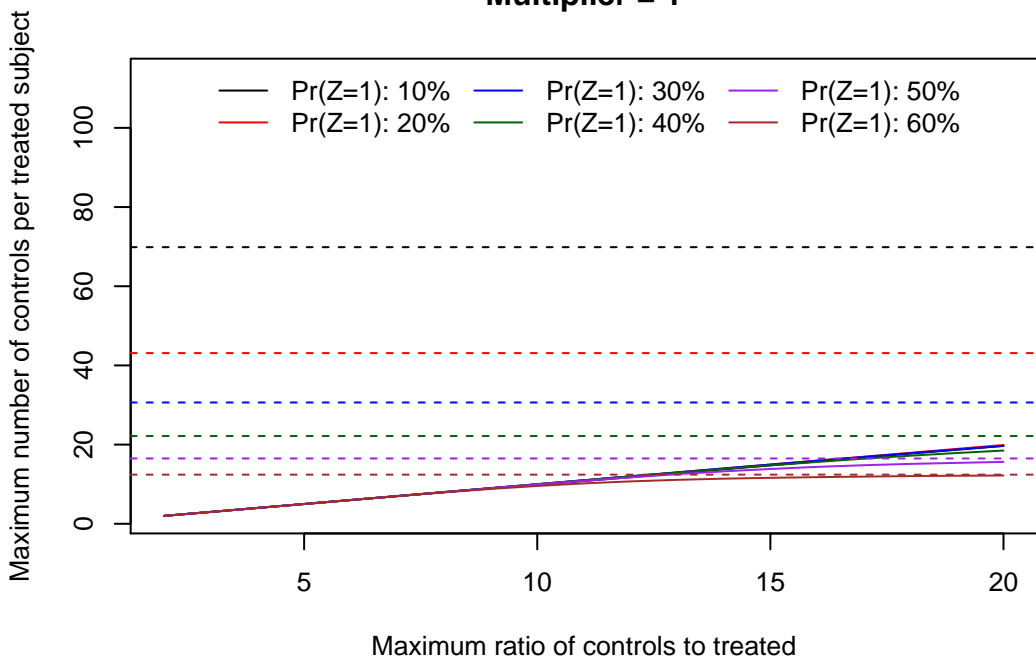

Multiplier = 2

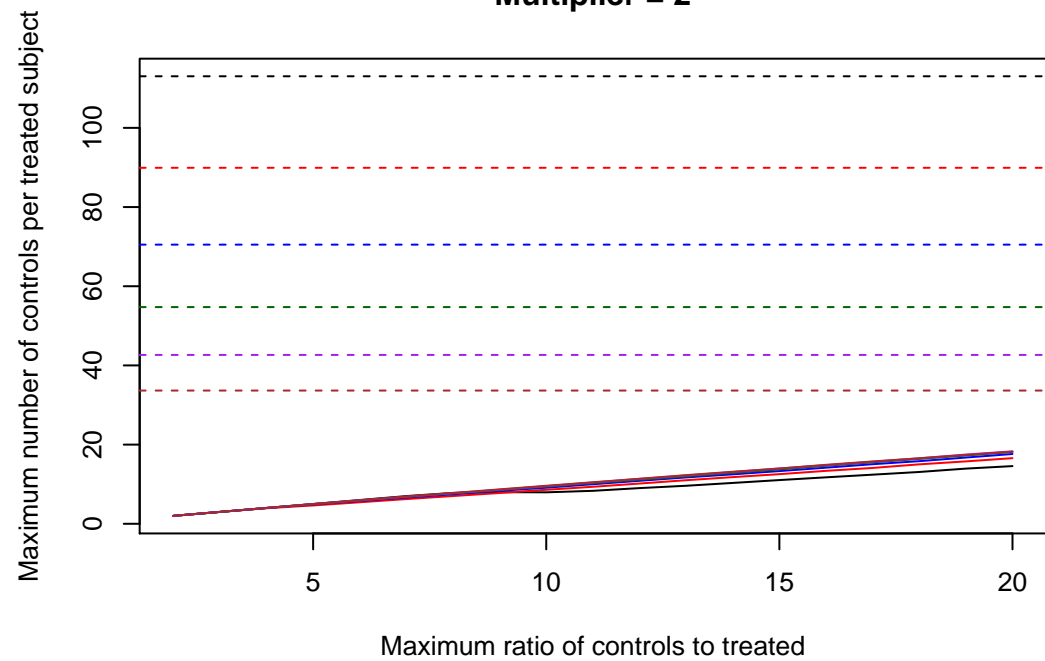

Multiplier = 3

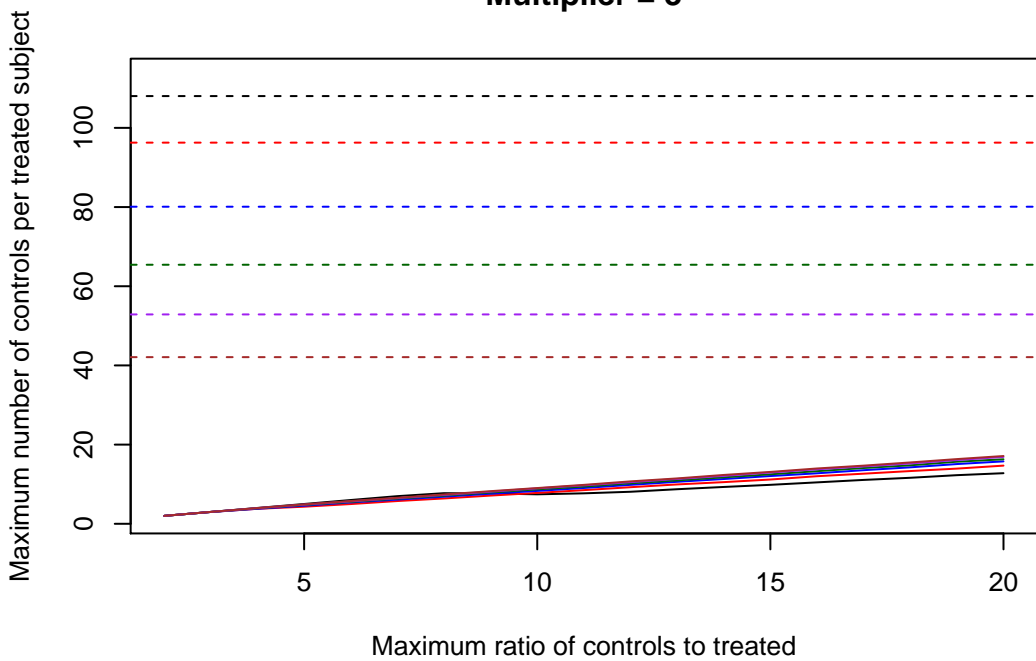

Multiplier = 4

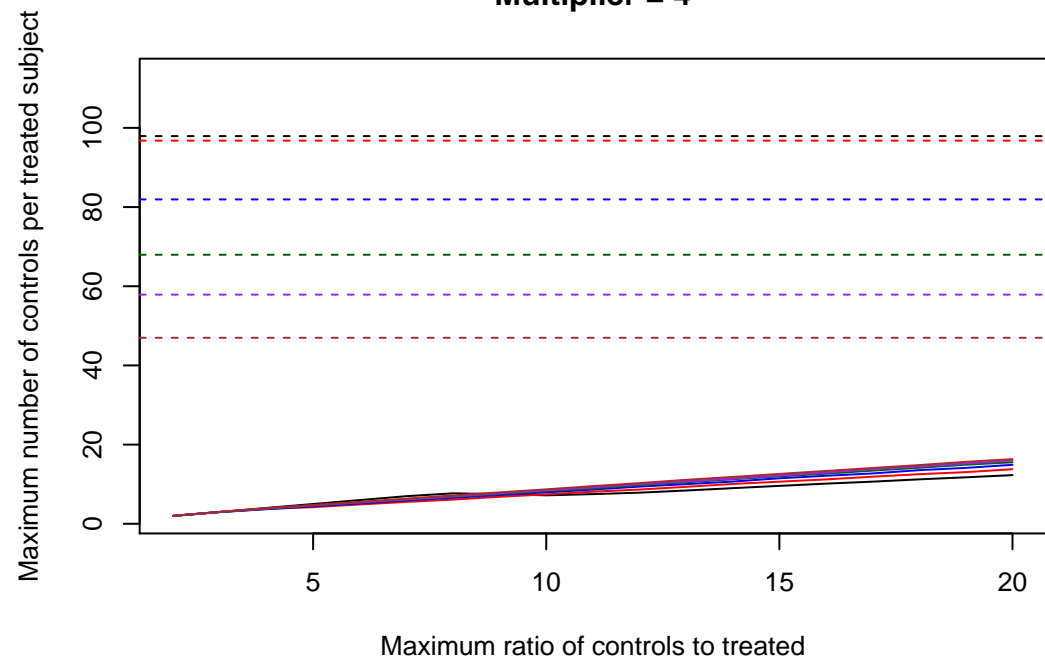

Figure A7. Mean standardized differences for the 10 baseline variables in original sample

Prevalence = 0.1

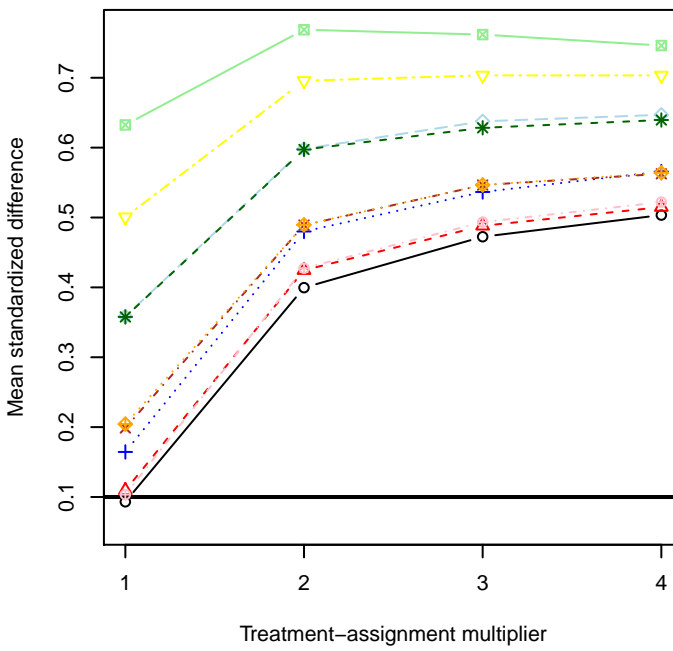

Prevalence = 0.2

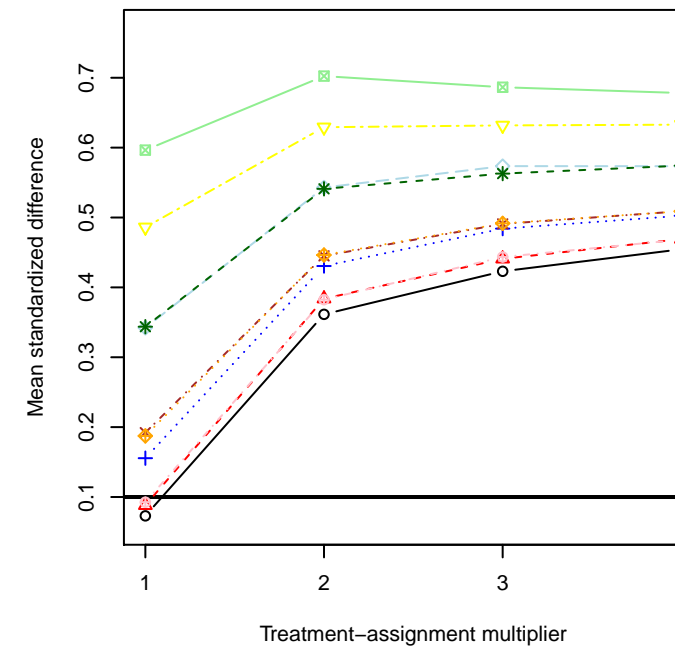

Prevalence = 0.3

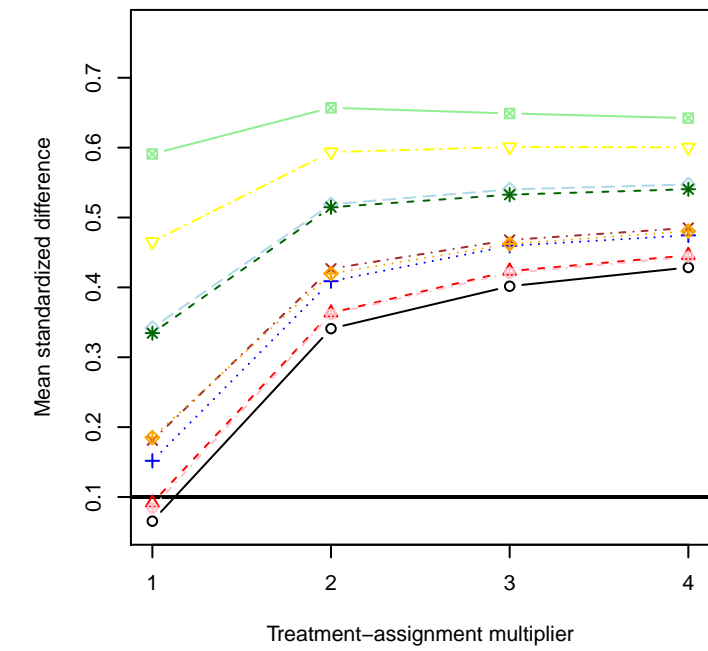

Prevalence = 0.4

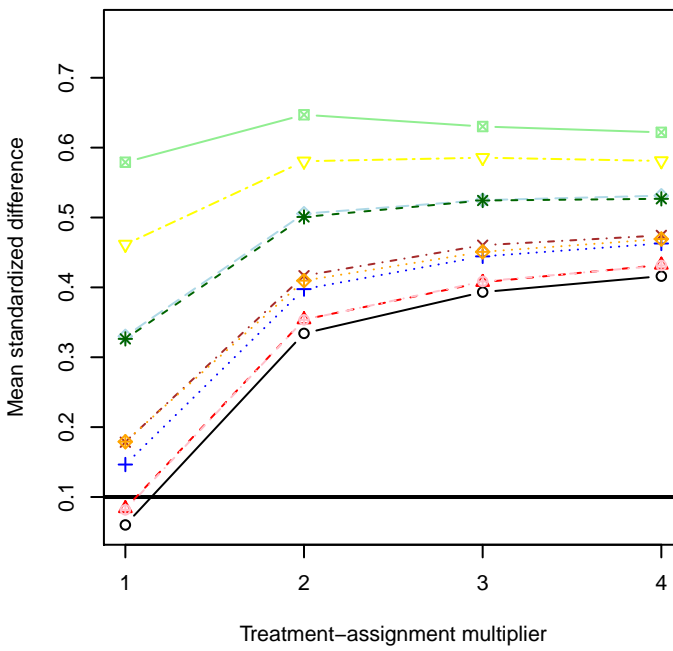

Prevalence = 0.5

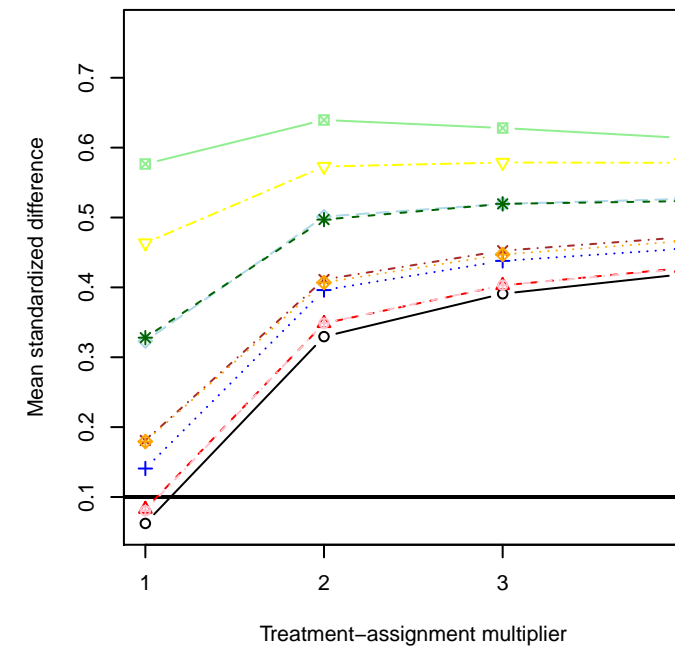

Prevalence = 0.6

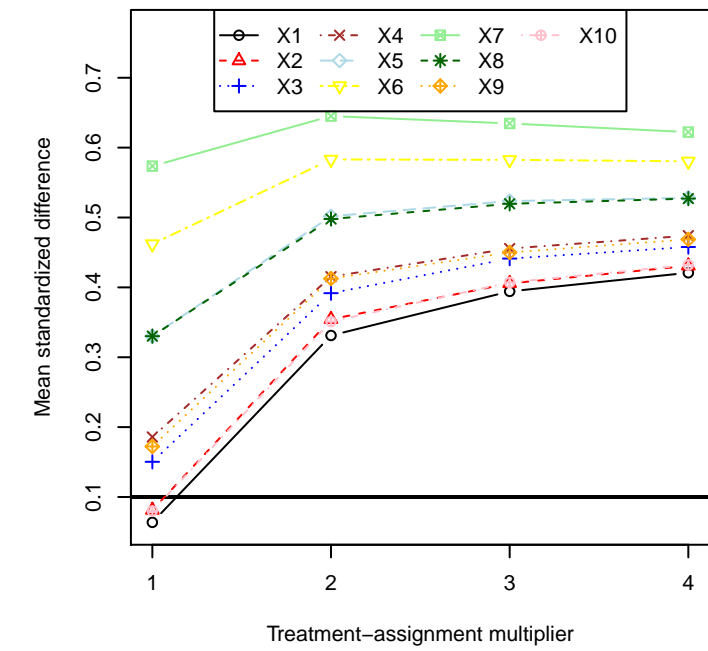

Figure A8. Maximum standardized difference after matching (no calipers)

Multiplier = 1

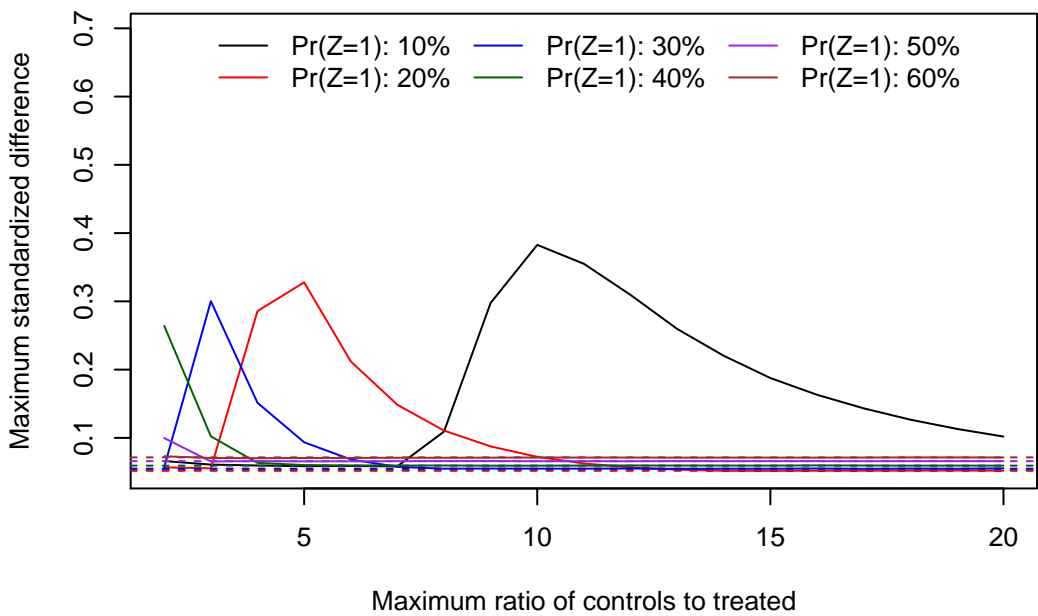

Multiplier = 2

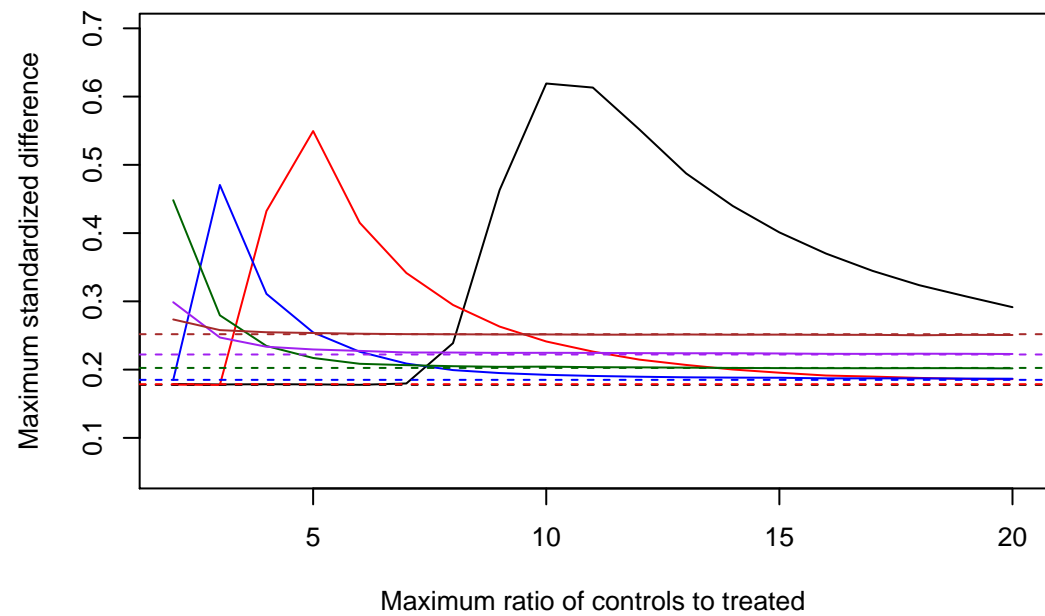

Multiplier = 3

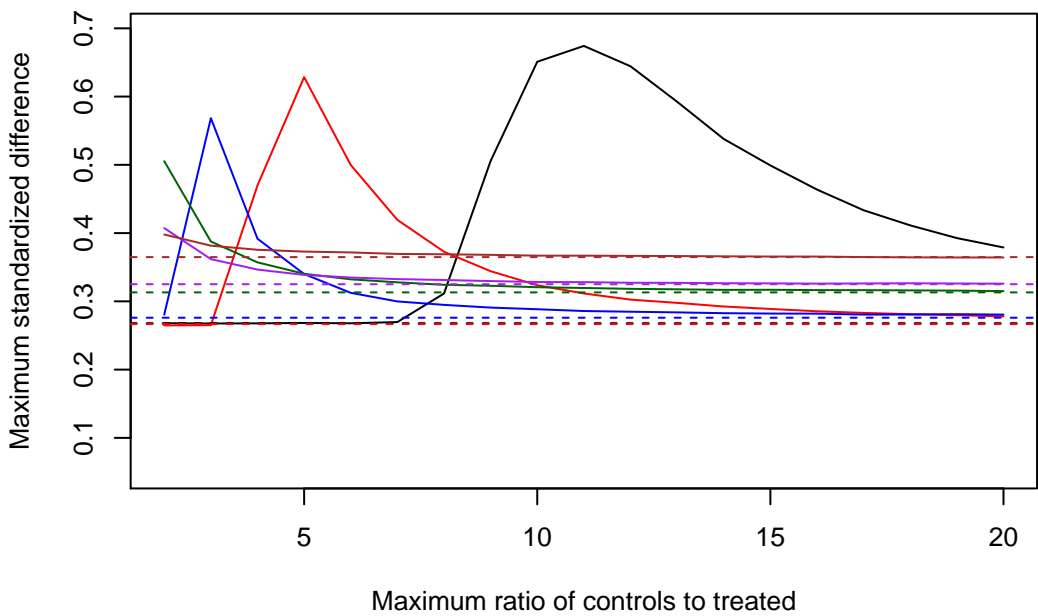

Multiplier = 4

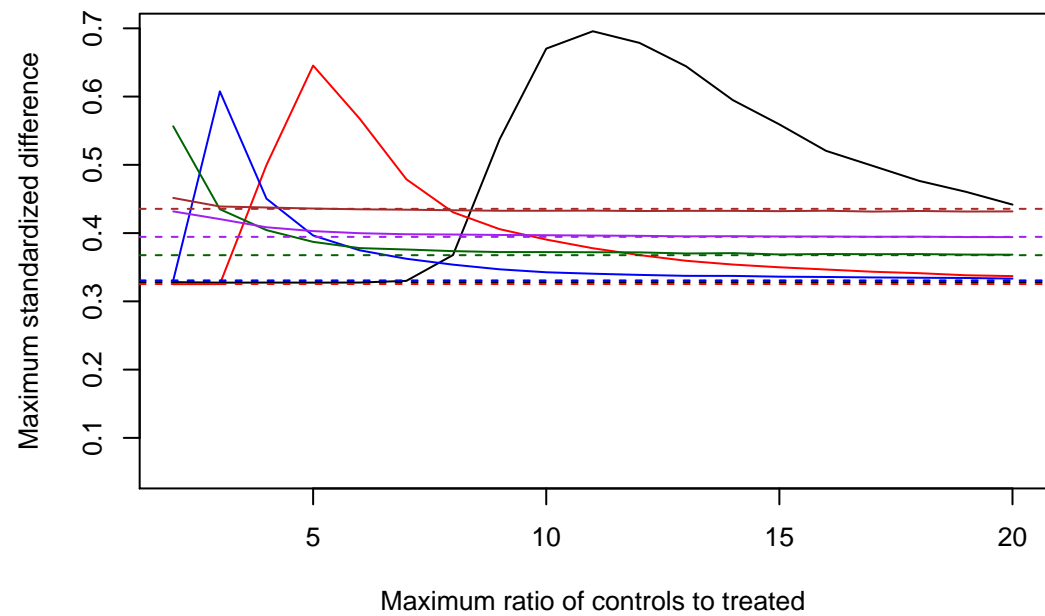



Figure A9. Maximum standardized difference after matching (with calipers)

Multiplier = 1

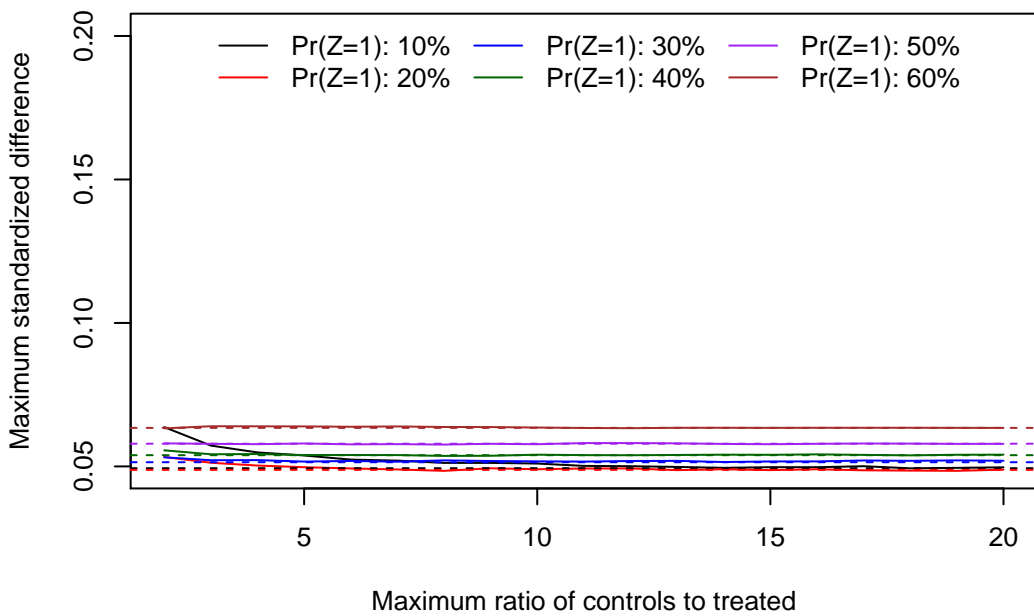

Multiplier = 2

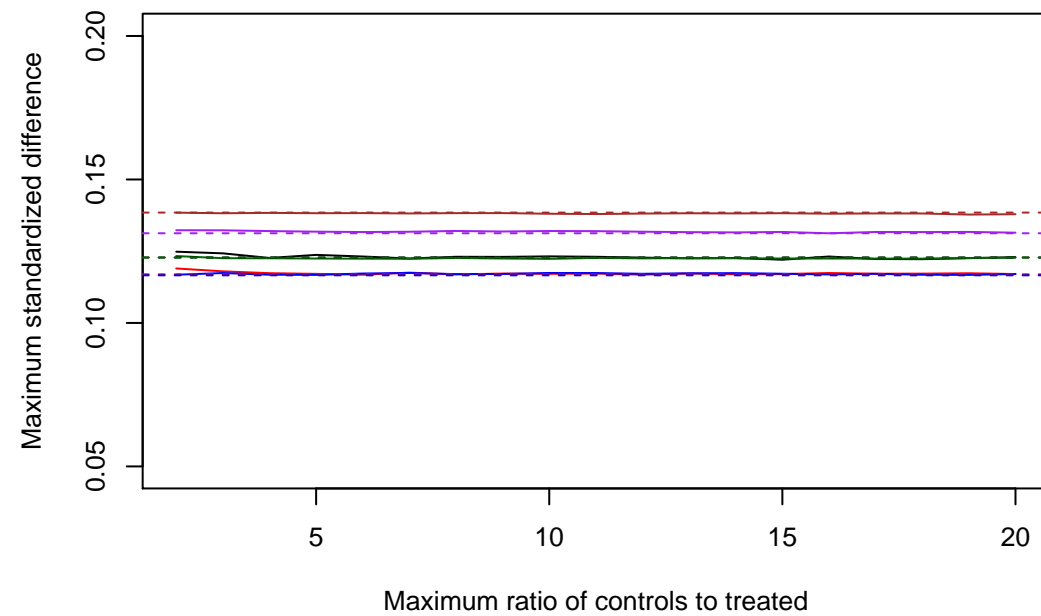

Multiplier = 3

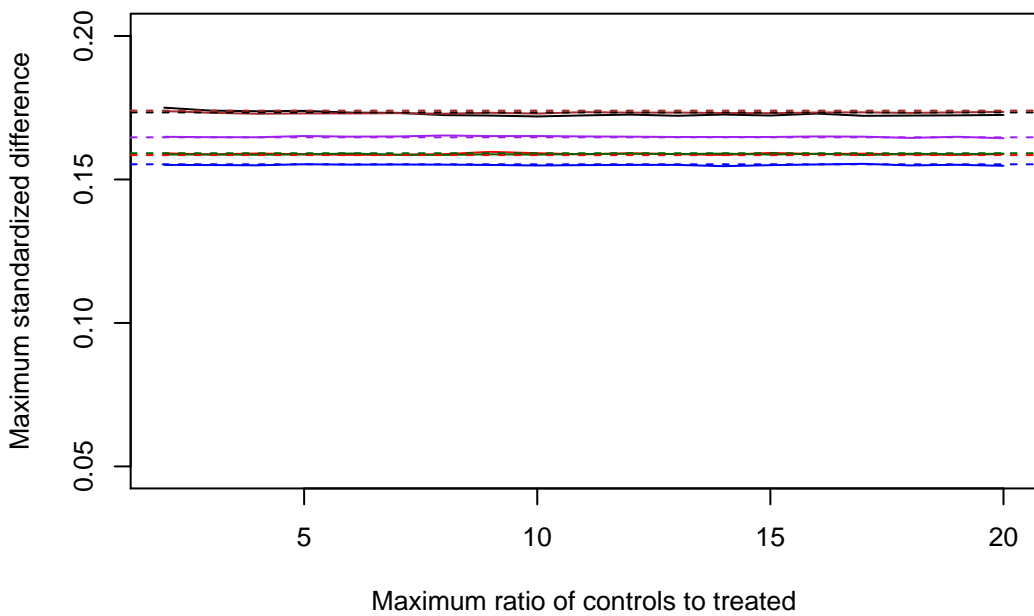

Multiplier = 4

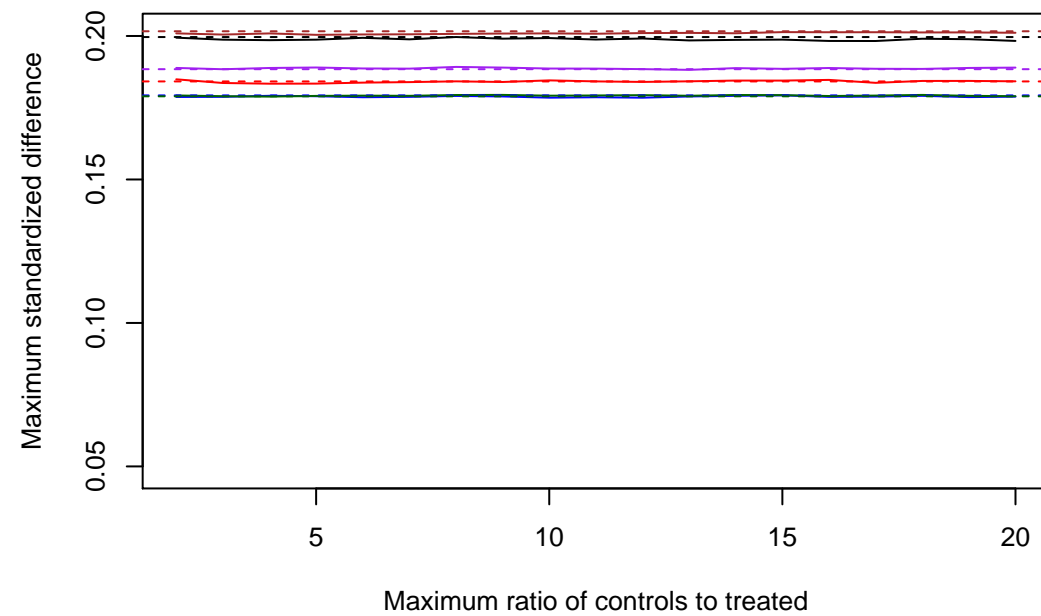

Figure A10. Bias in estimated risk difference (no calipers) (N = 1000 & RD = 0)

Multiplier = 1

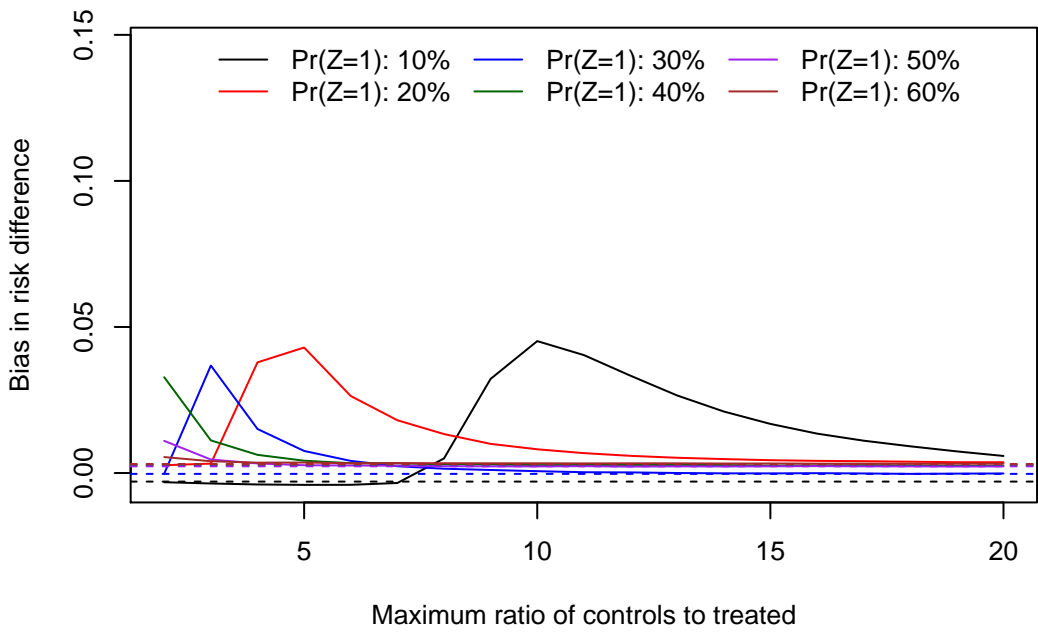

Multiplier = 2

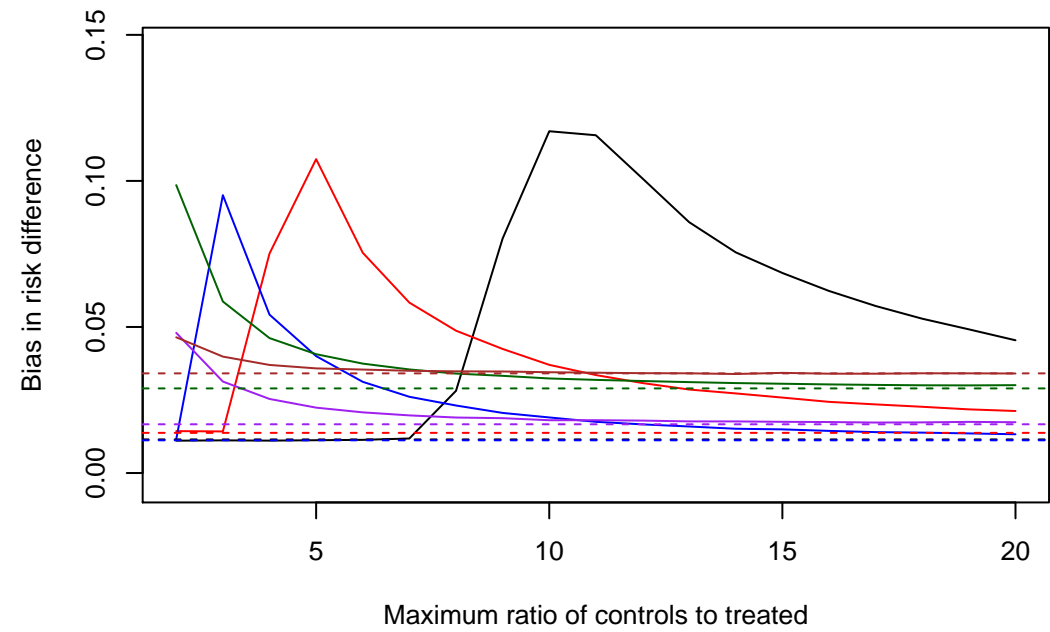

Multiplier = 3

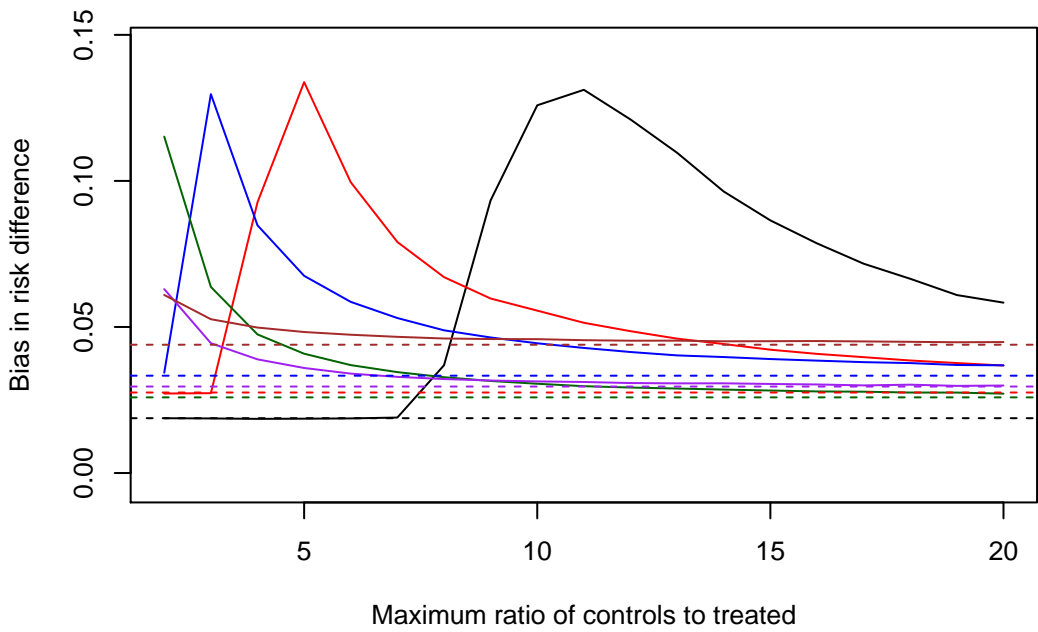

Multiplier = 4

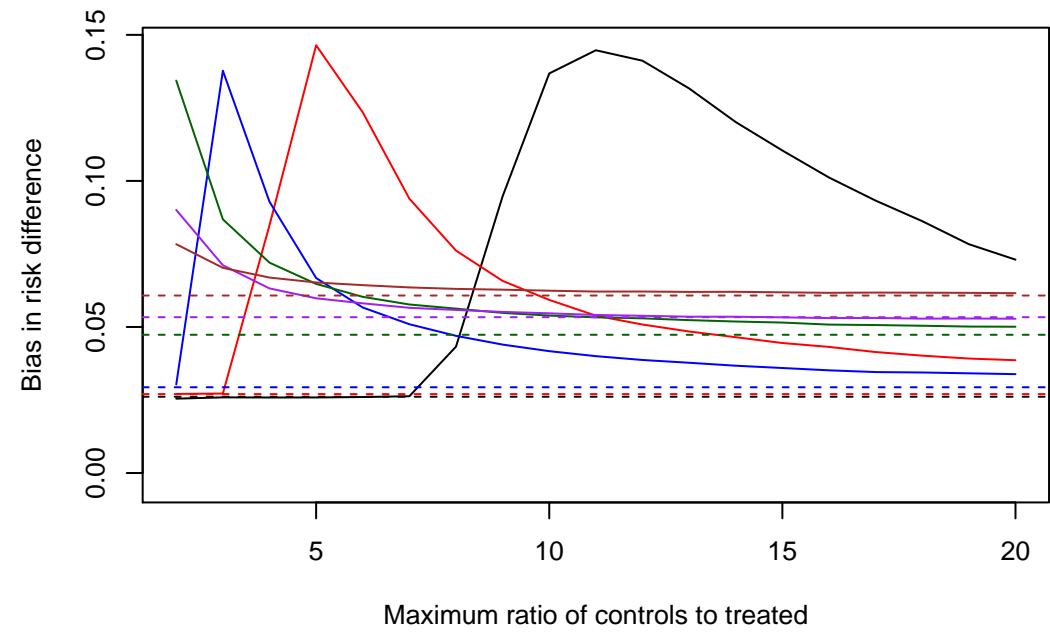

Figure A11. Bias in estimated risk difference (with calipers) (N = 1000 & RD = 0)

Multiplier = 1

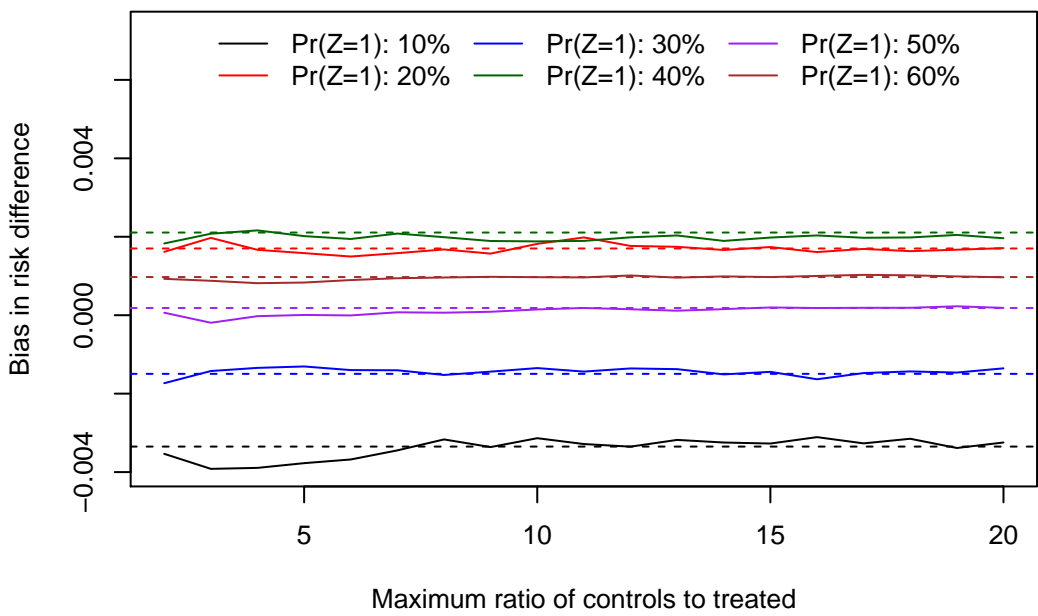

Multiplier = 2

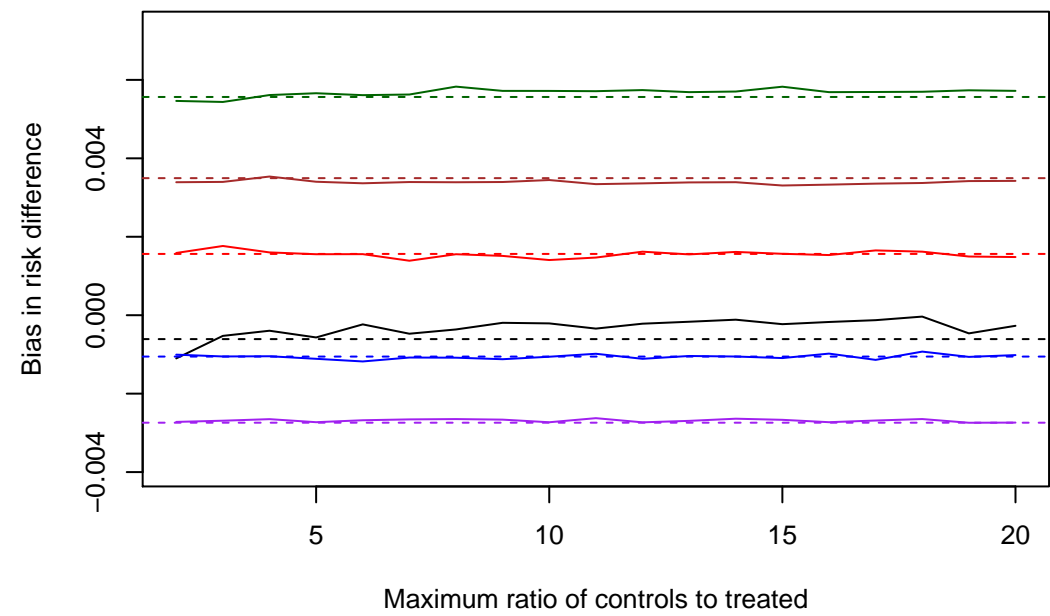

Multiplier = 3

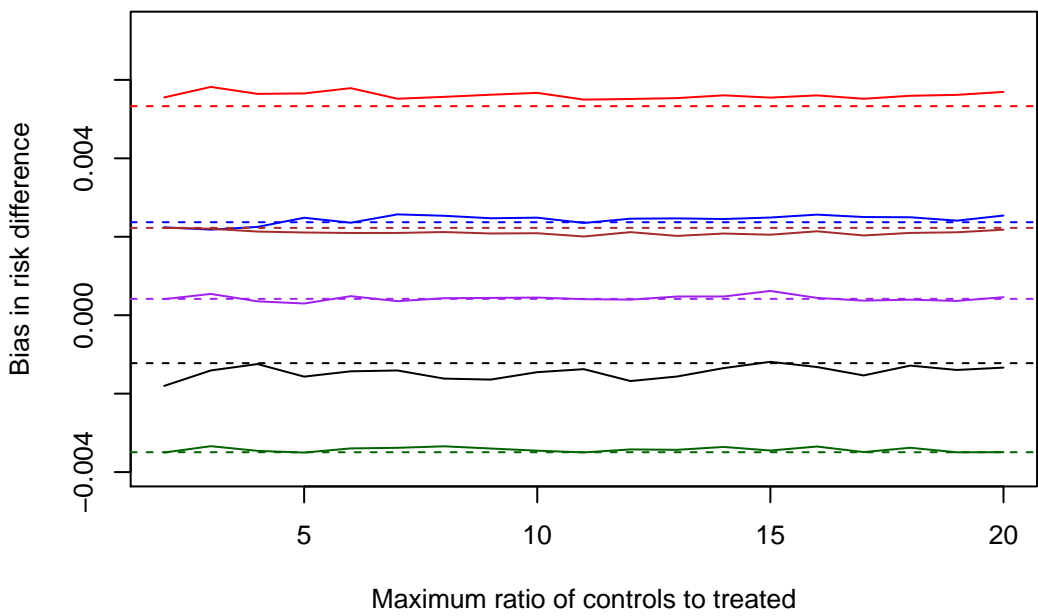

Multiplier = 4

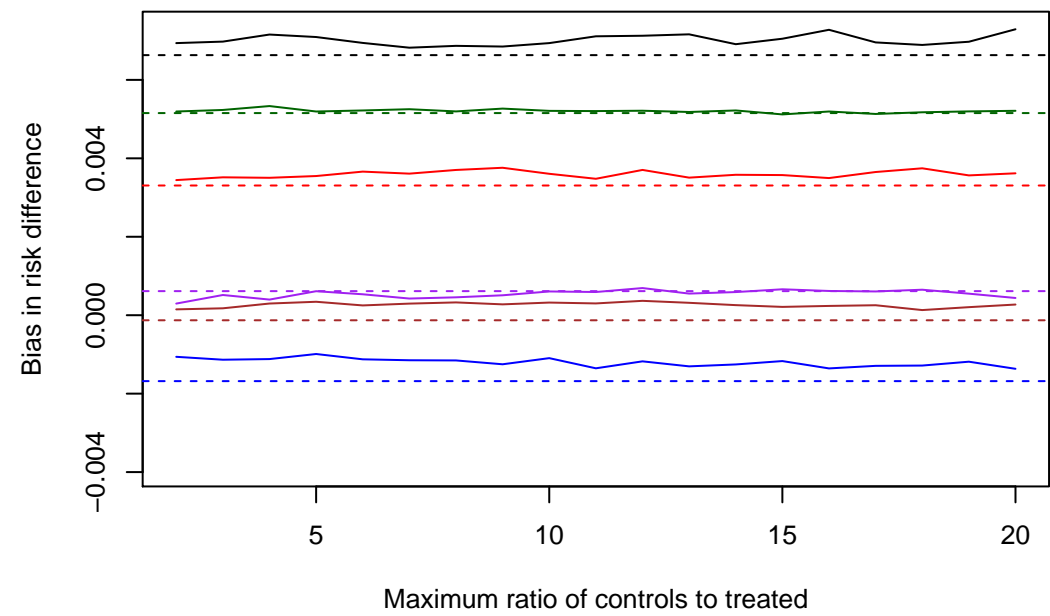

Figure A12. Standard deviation of estimated risk difference (no calipers) (N = 1000 & RD = 0)

Multiplier = 1

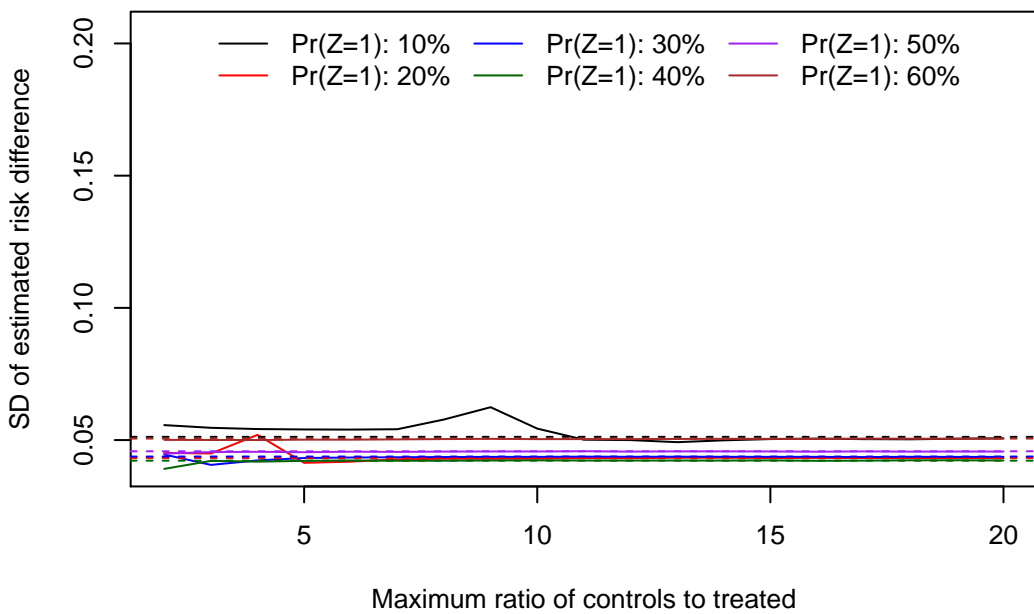

Multiplier = 2

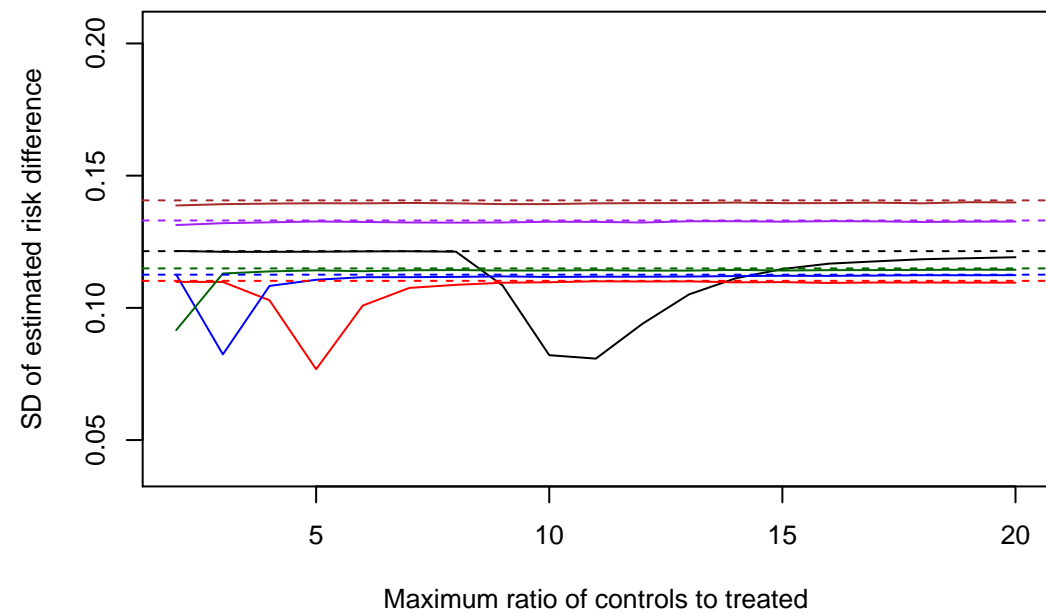

Multiplier = 3

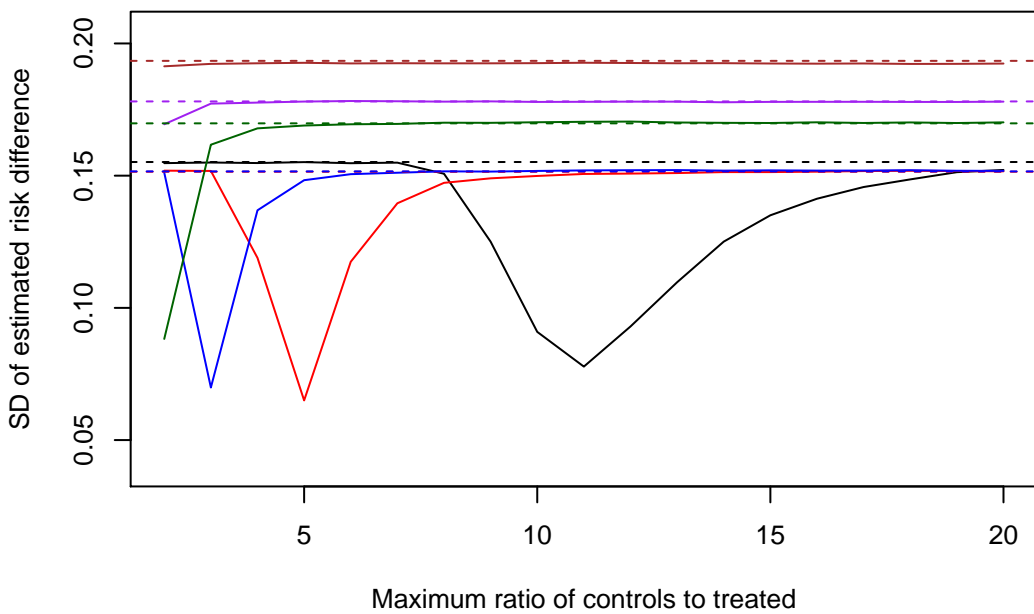

Multiplier = 4

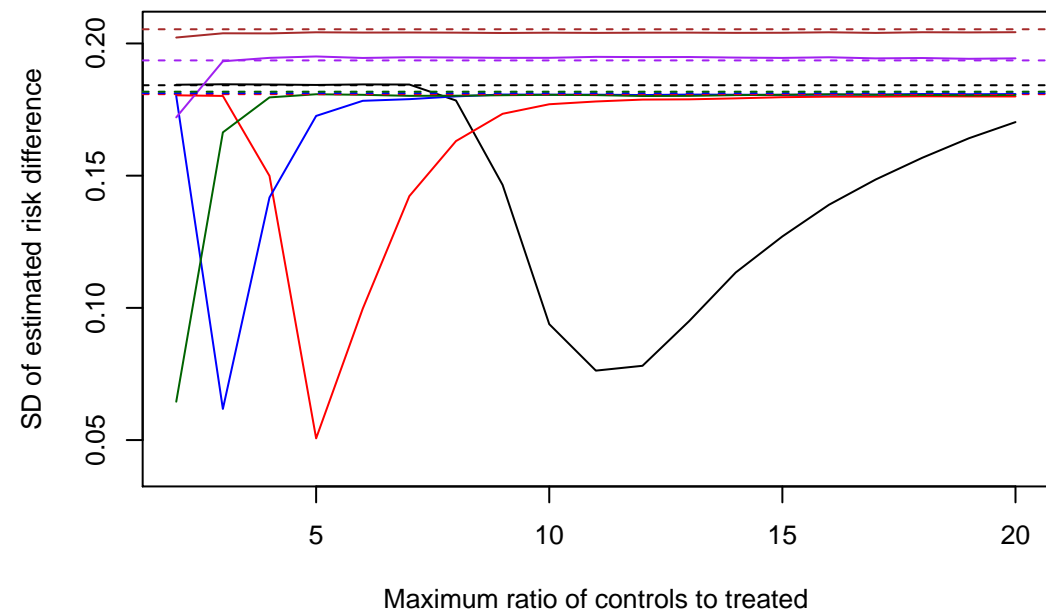

Figure A13. Standard deviation of estimated risk difference (with calipers) (N = 1000 & RD = 0)

Multiplier = 1

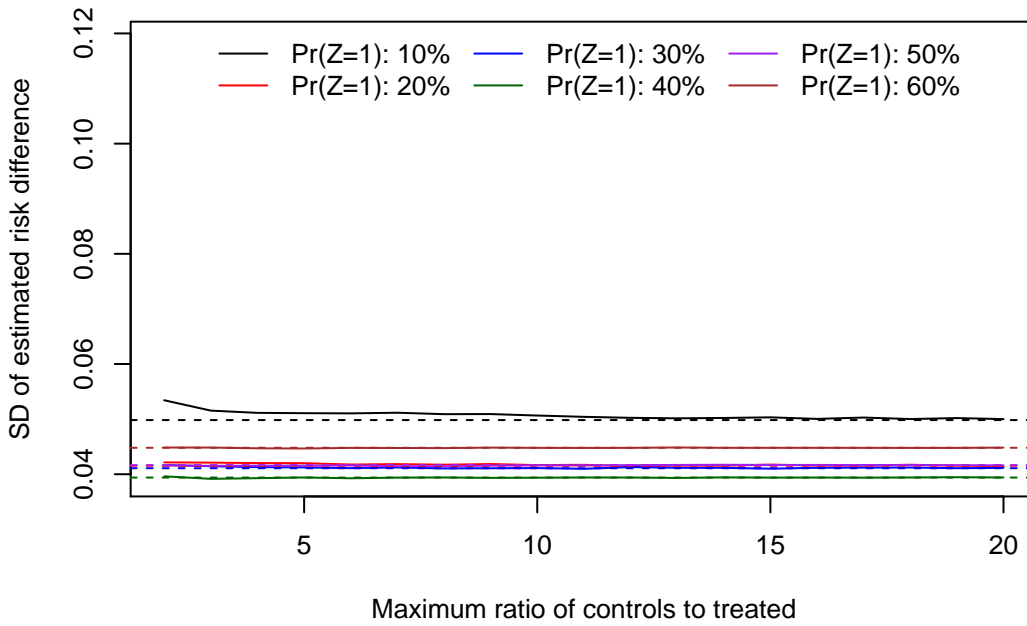

Multiplier = 2

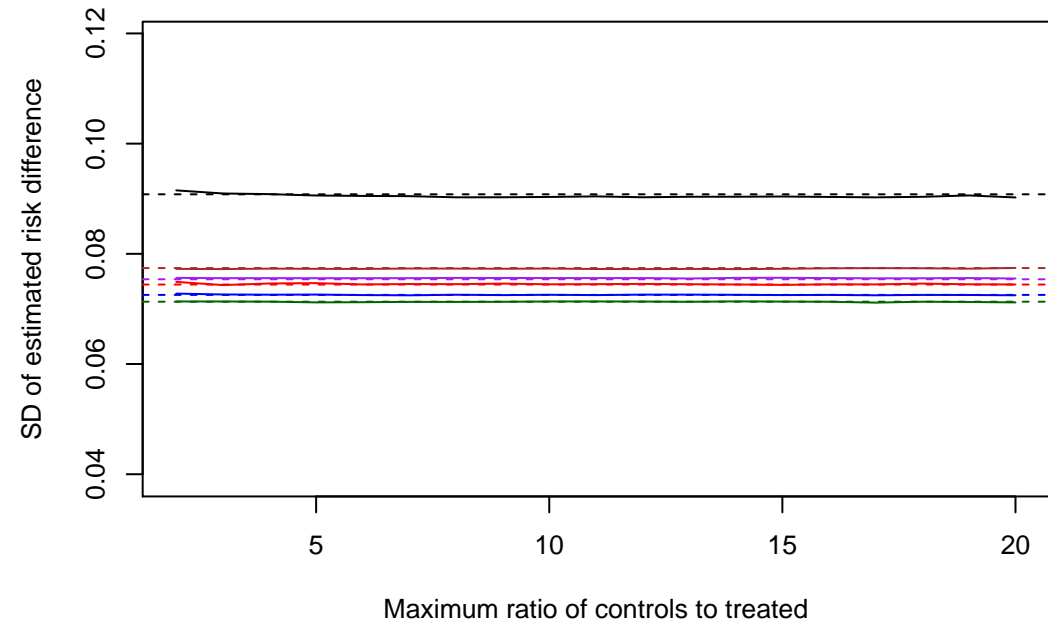

Multiplier = 3

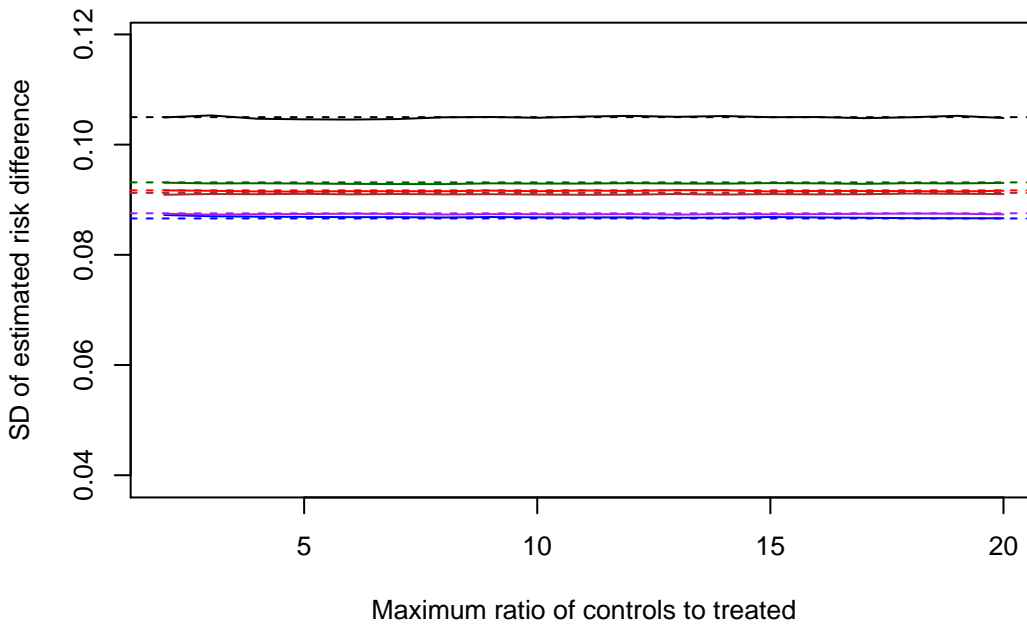

Multiplier = 4

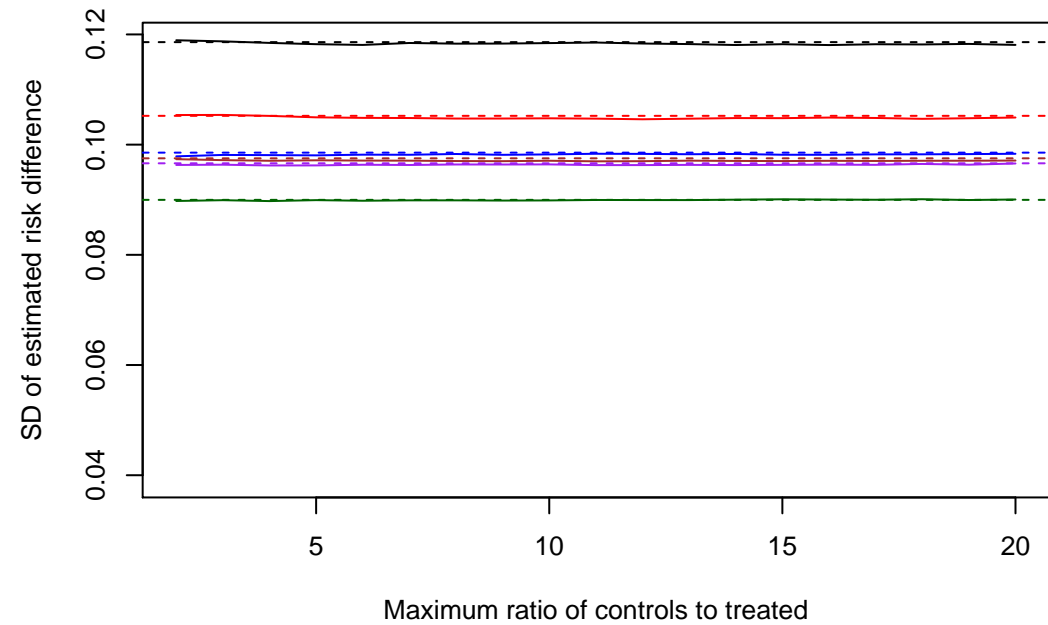

Figure A14. MSE of estimated risk difference (no calipers) (N = 1000 & RD = 0)

Multiplier = 1

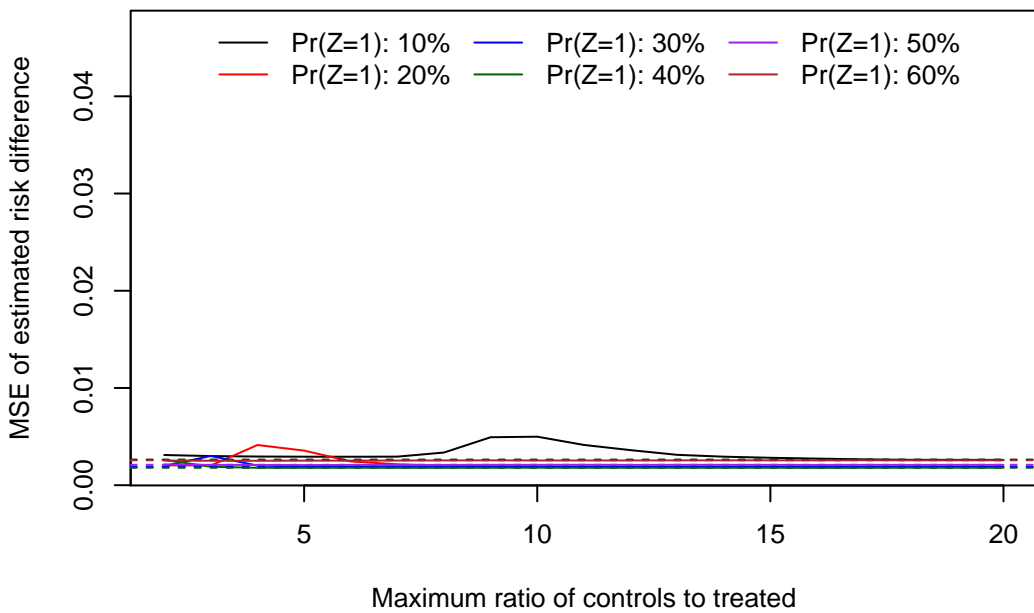

Multiplier = 2

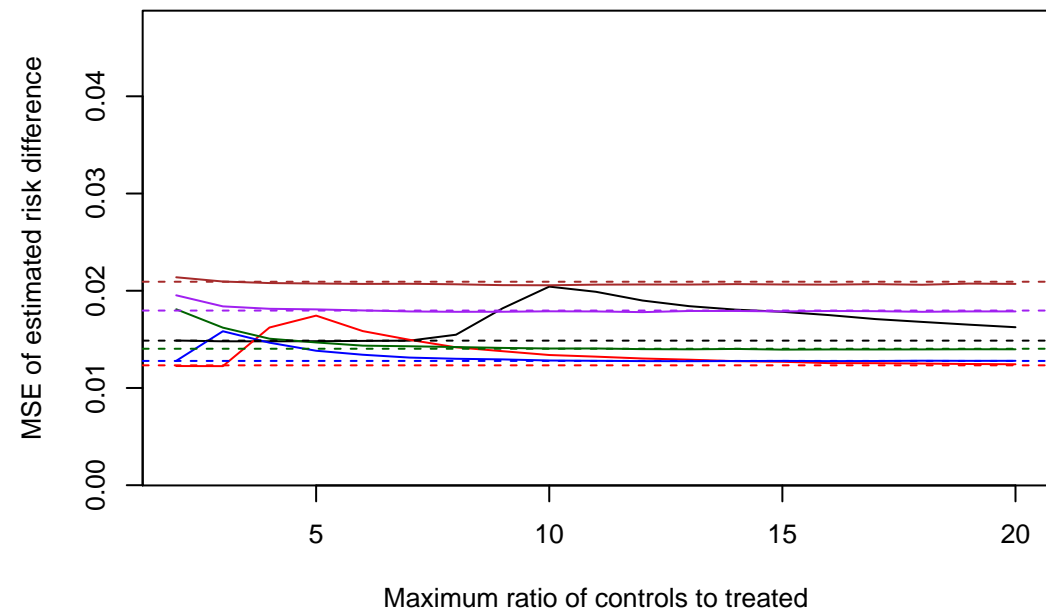

Multiplier = 3

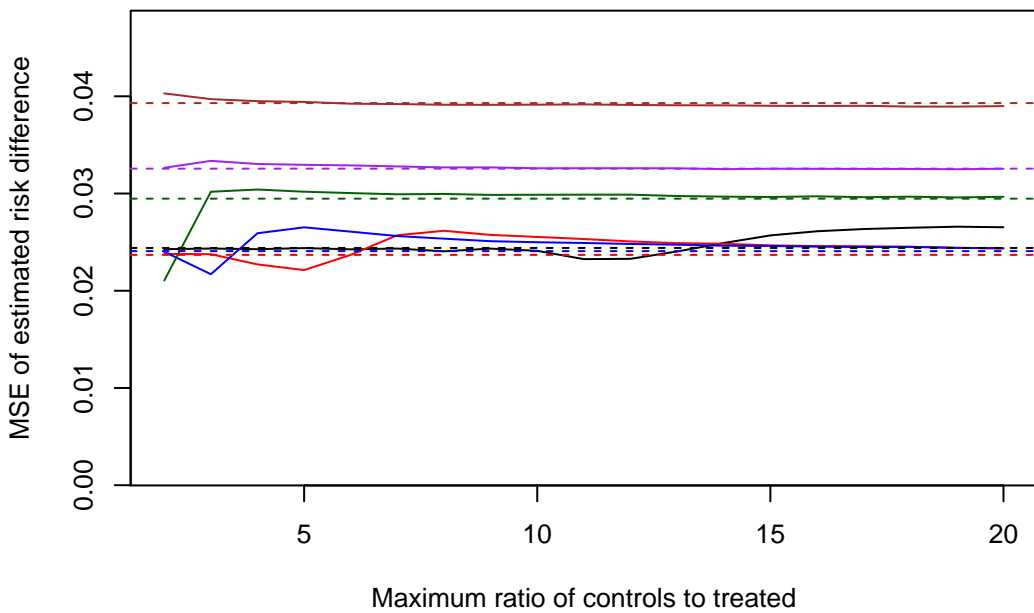

Multiplier = 4

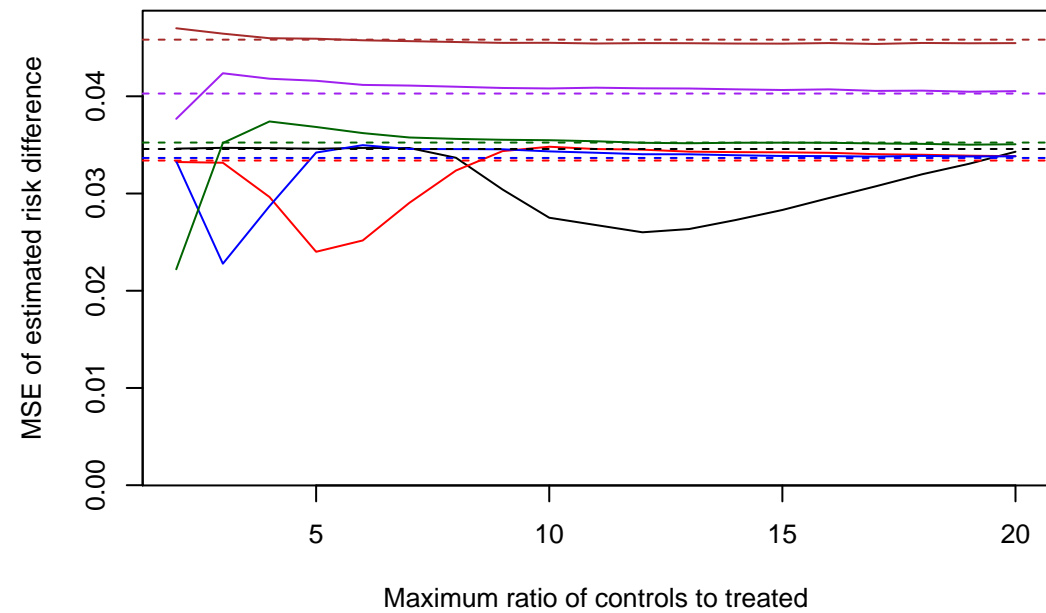

Figure A15. MSE of estimated risk difference (with calipers) (N = 1000 & RD = 0)

Multiplier = 1

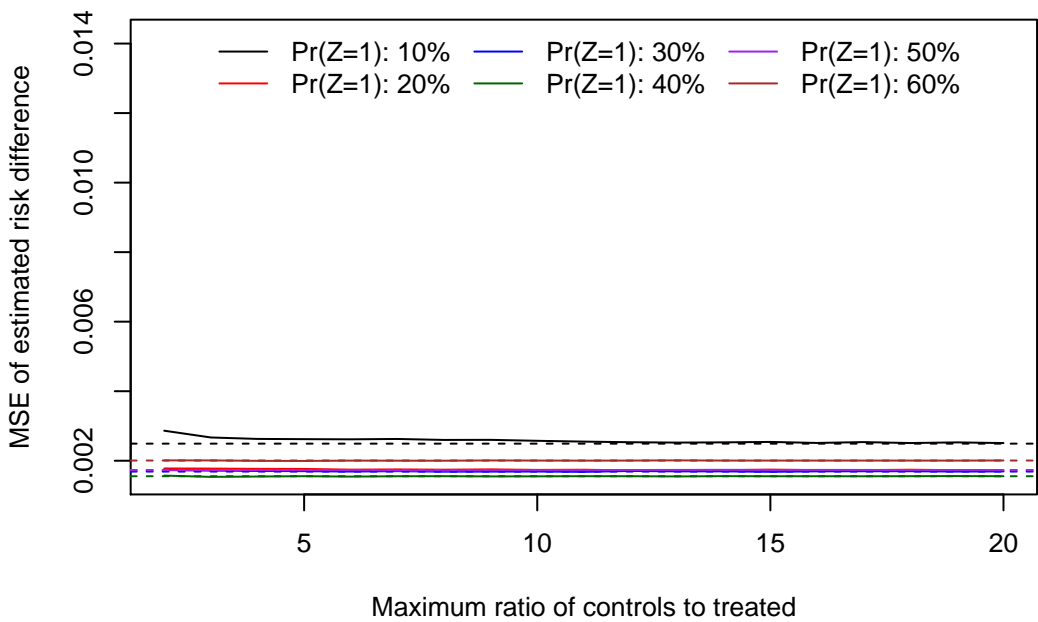

Multiplier = 2

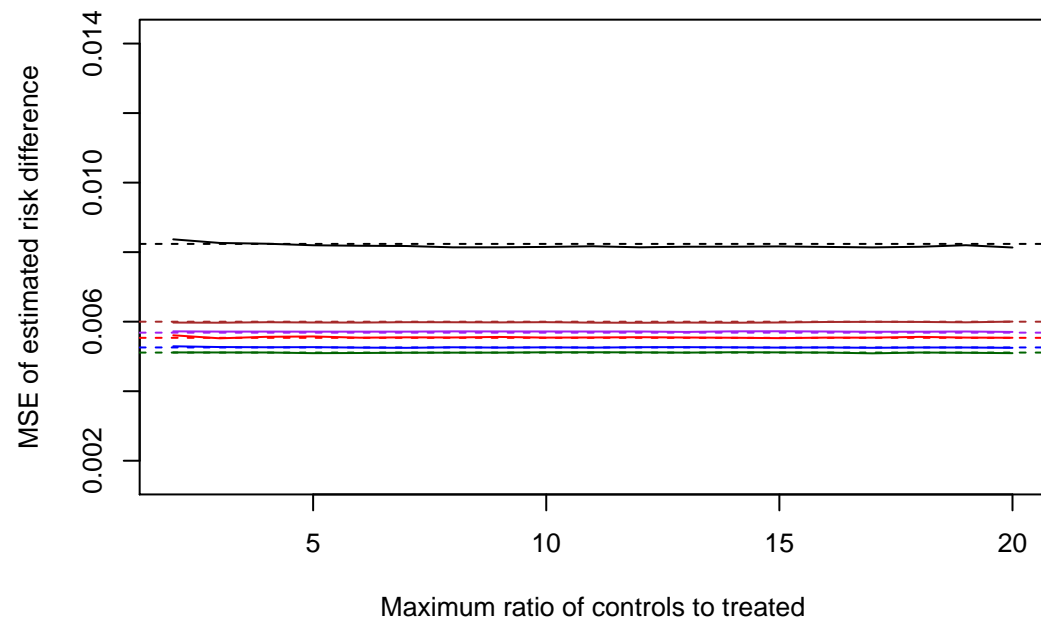

Multiplier = 3

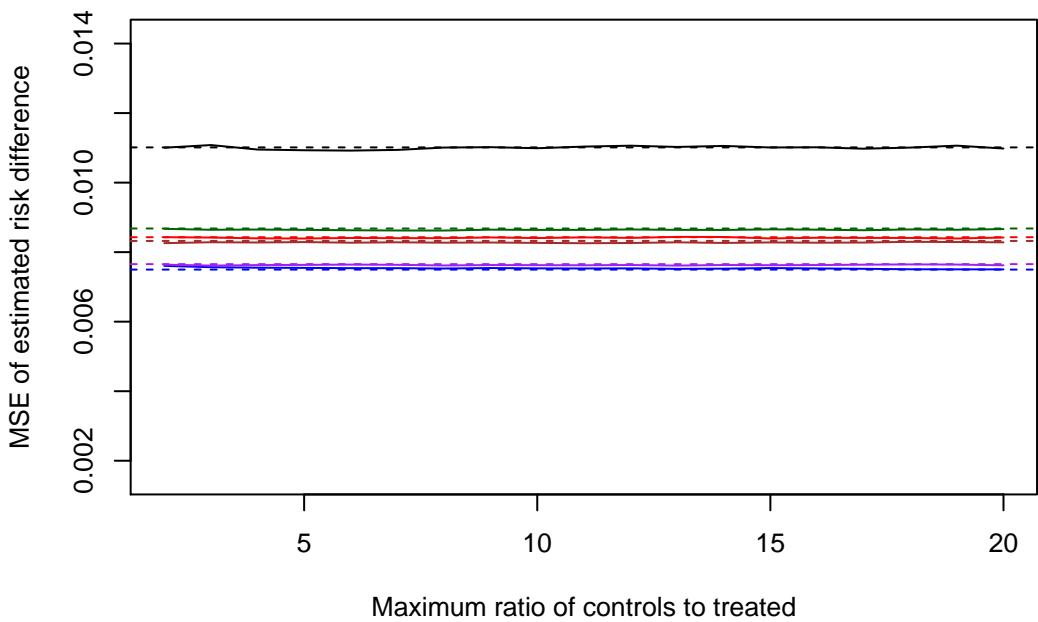

Multiplier = 4

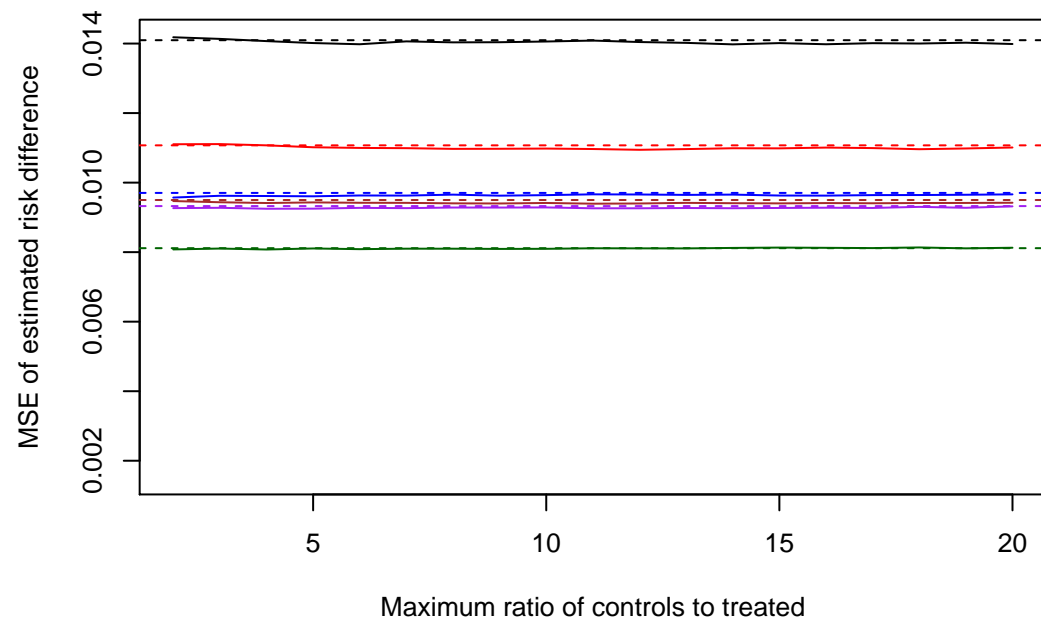

Figure A16. Relative bias (%) in estimated risk difference (no calipers) (N = 1000 & RD = -0.04)

Multiplier = 1

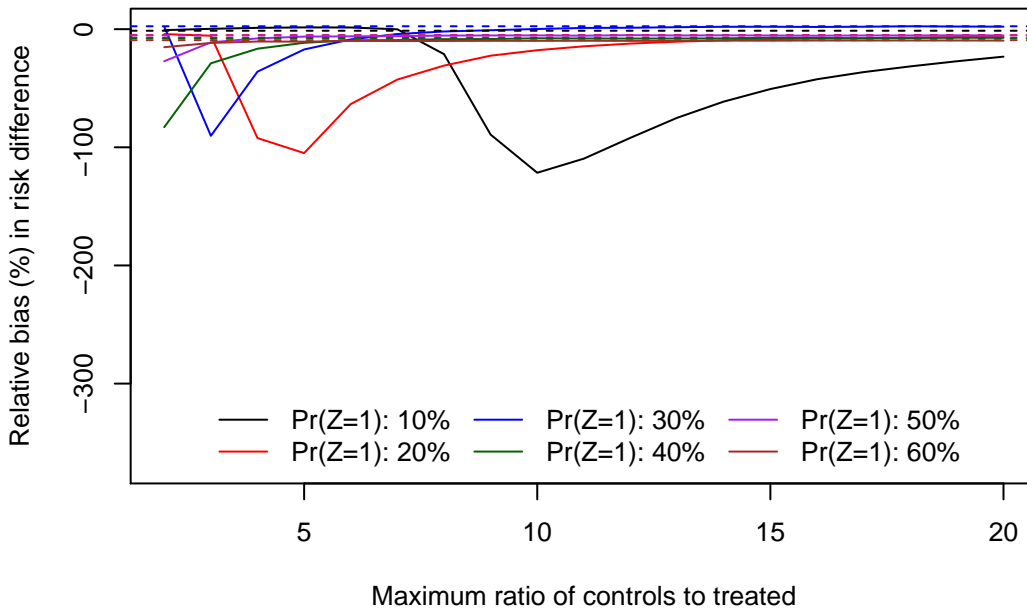

Multiplier = 2

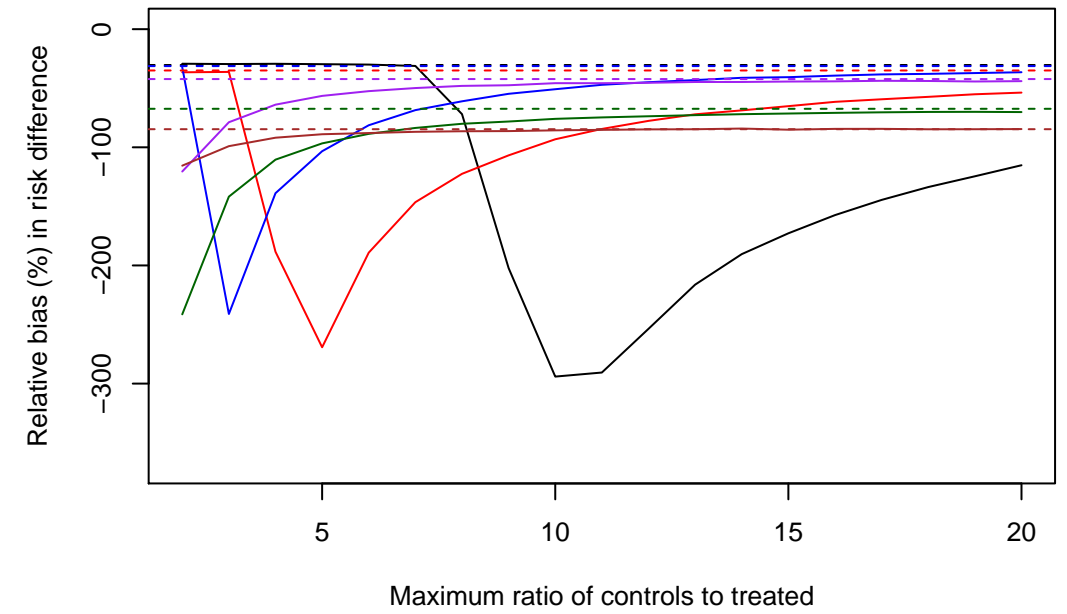

Multiplier = 3

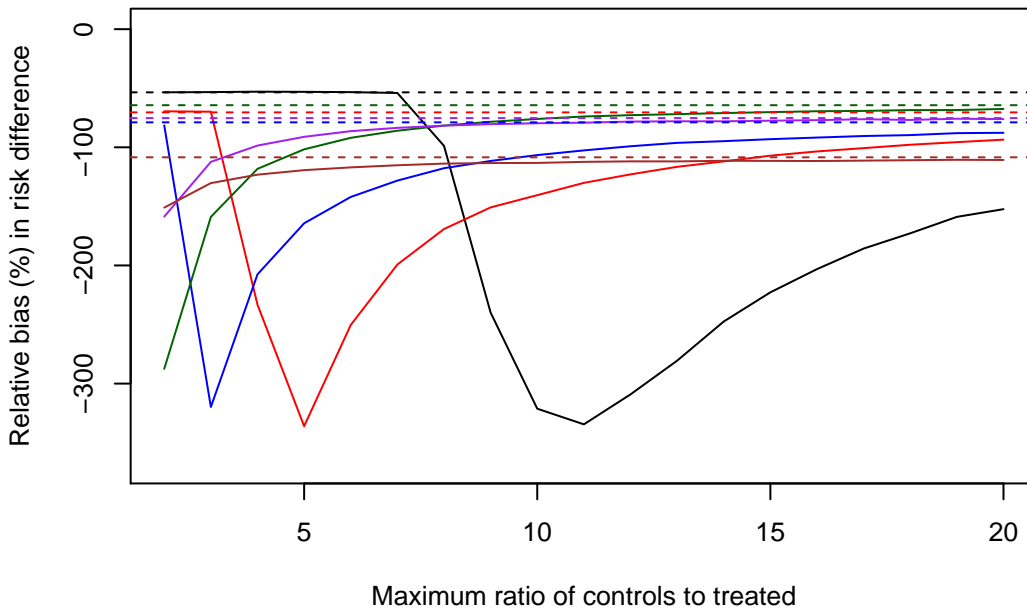

Multiplier = 4

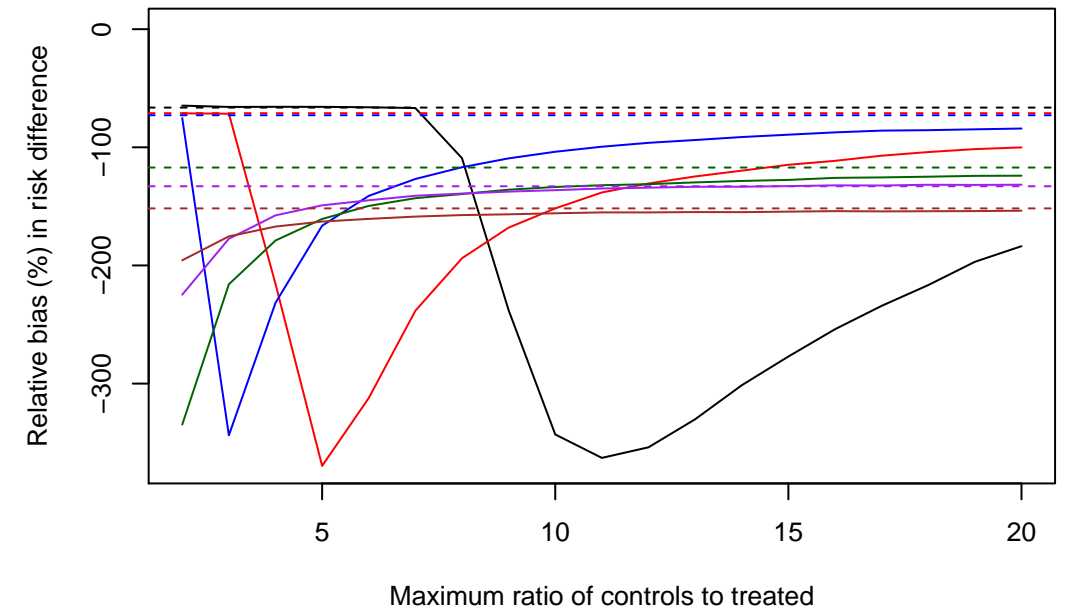



Figure A17. Relative bias (%) in estimated risk difference (with calipers) (N = 1000 & RD = -0.04)

Multiplier = 1

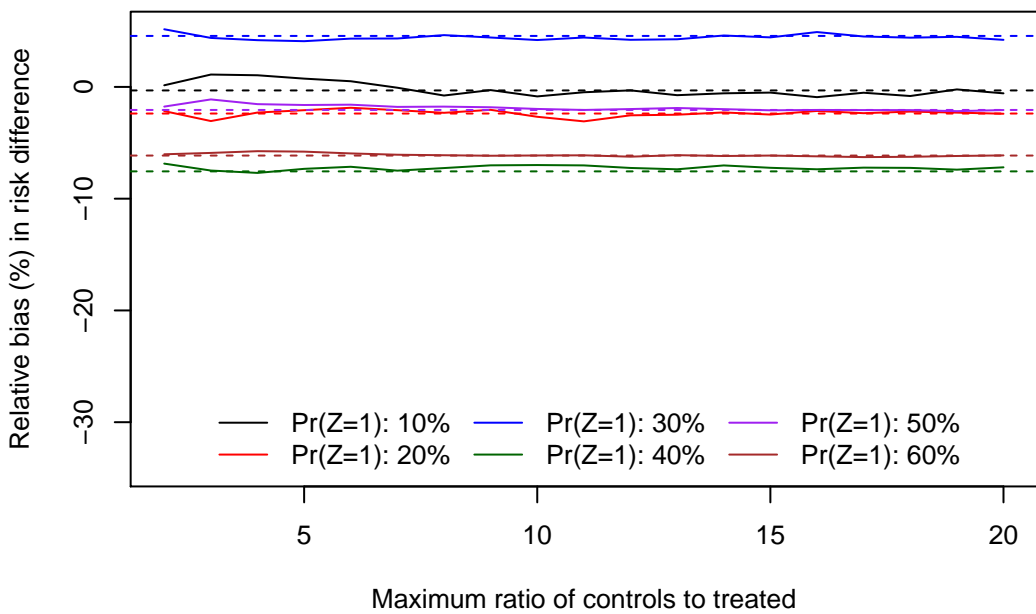

Multiplier = 2

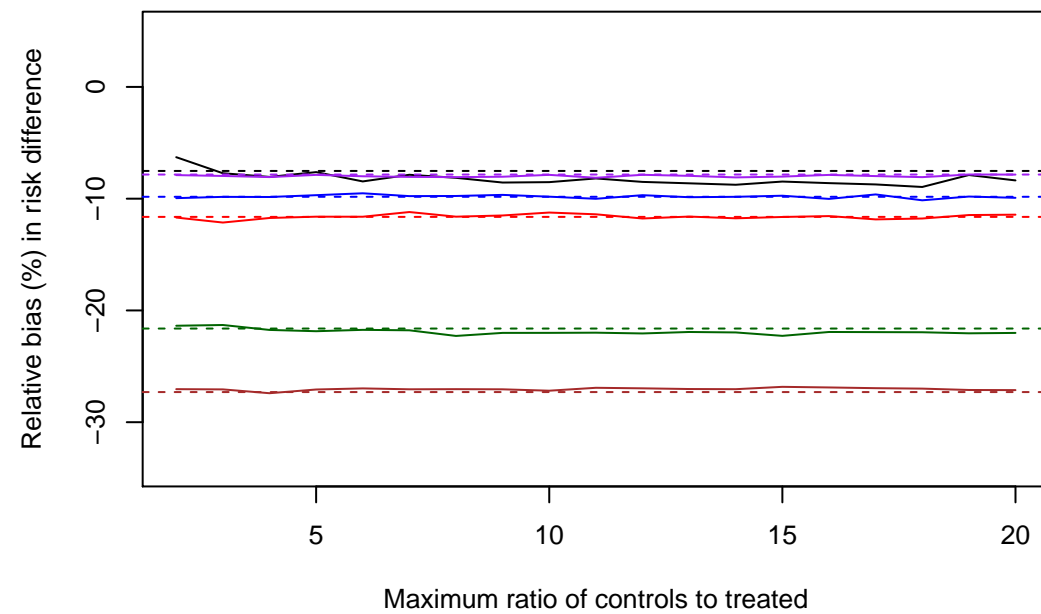

Multiplier = 3

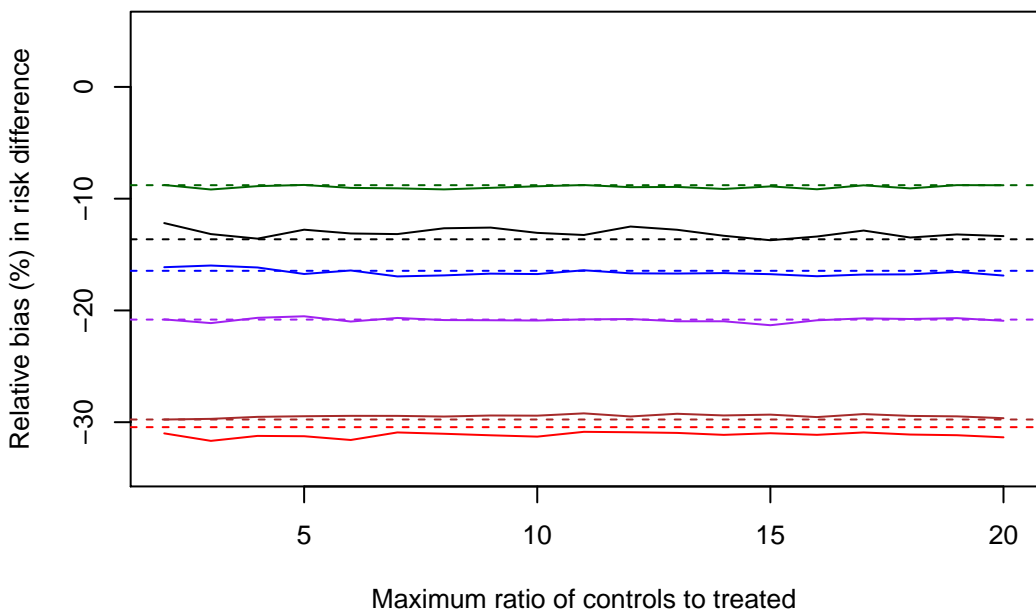

Multiplier = 4

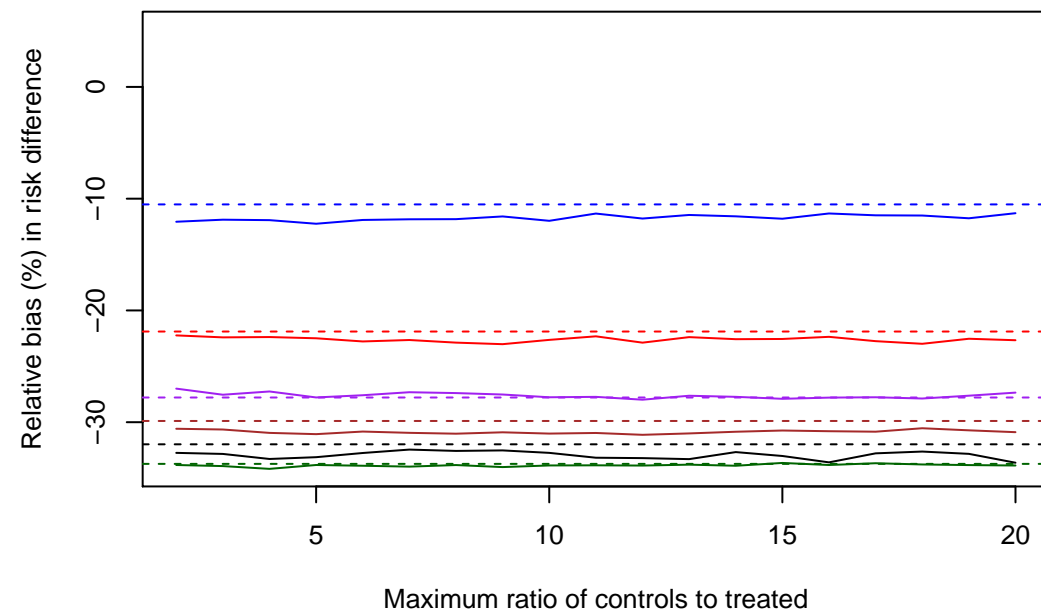

Figure A18. Standard deviation of estimated risk difference (no calipers) (N = 1000 & RD = -0.04)

Multiplier = 1

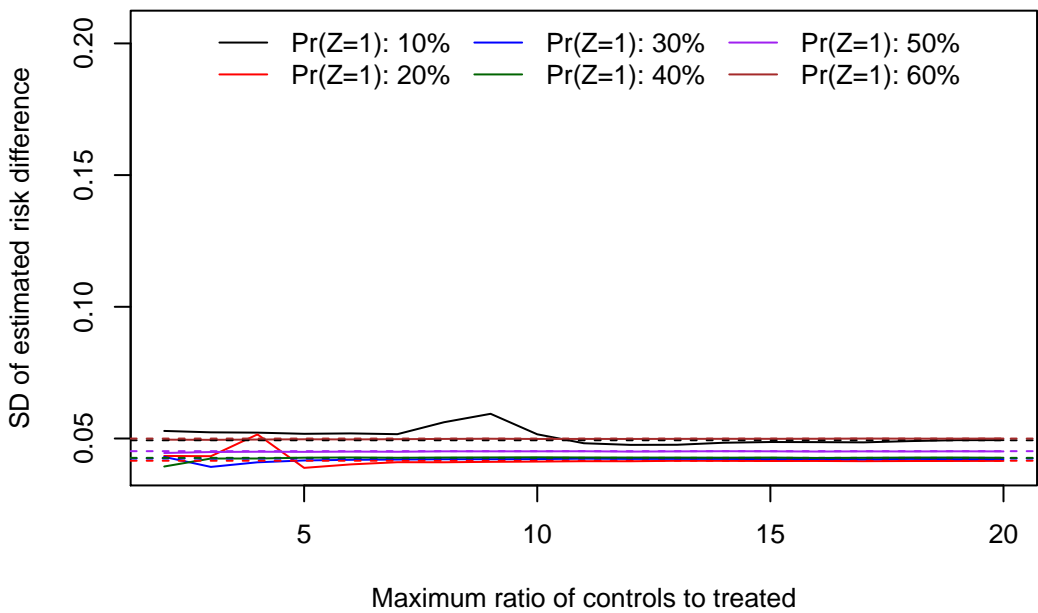

Multiplier = 2

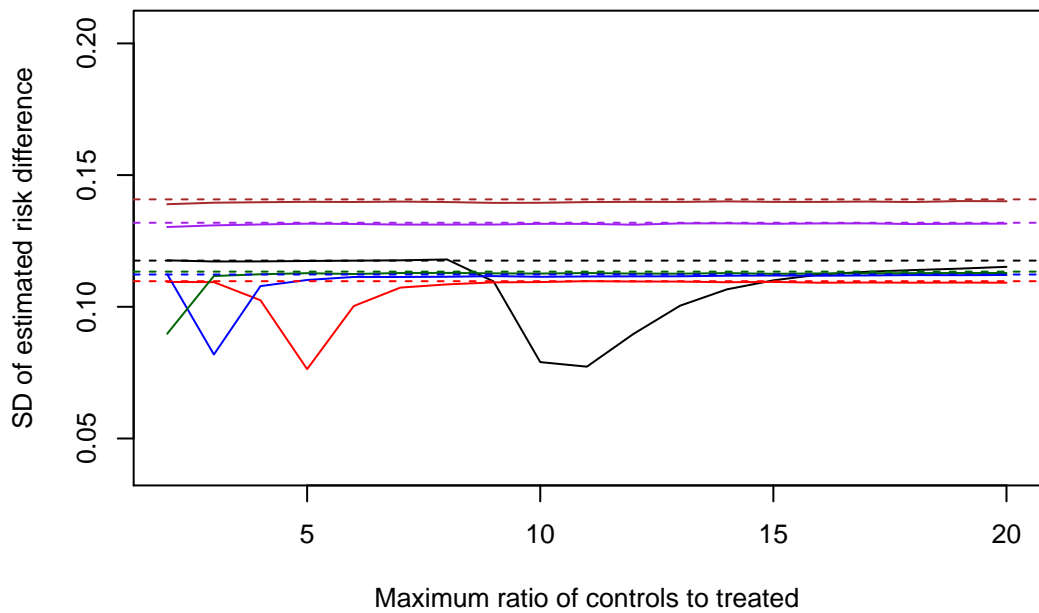

Multiplier = 3

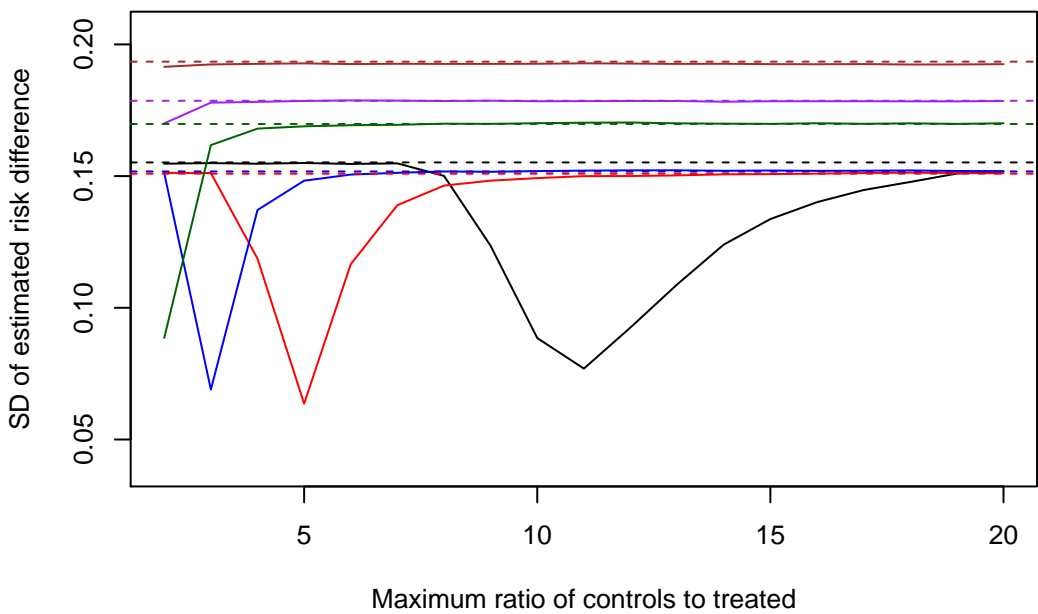

Multiplier = 4

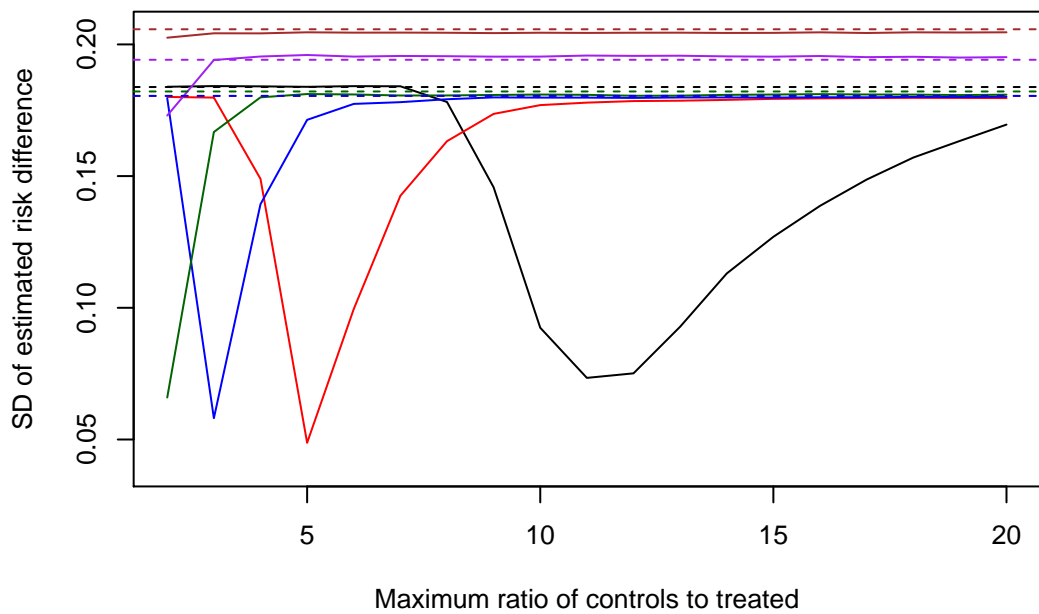

Figure A19. Standard deviation of estimated risk difference (with calipers) (N = 1000 & RD = -0.04)

Multiplier = 1

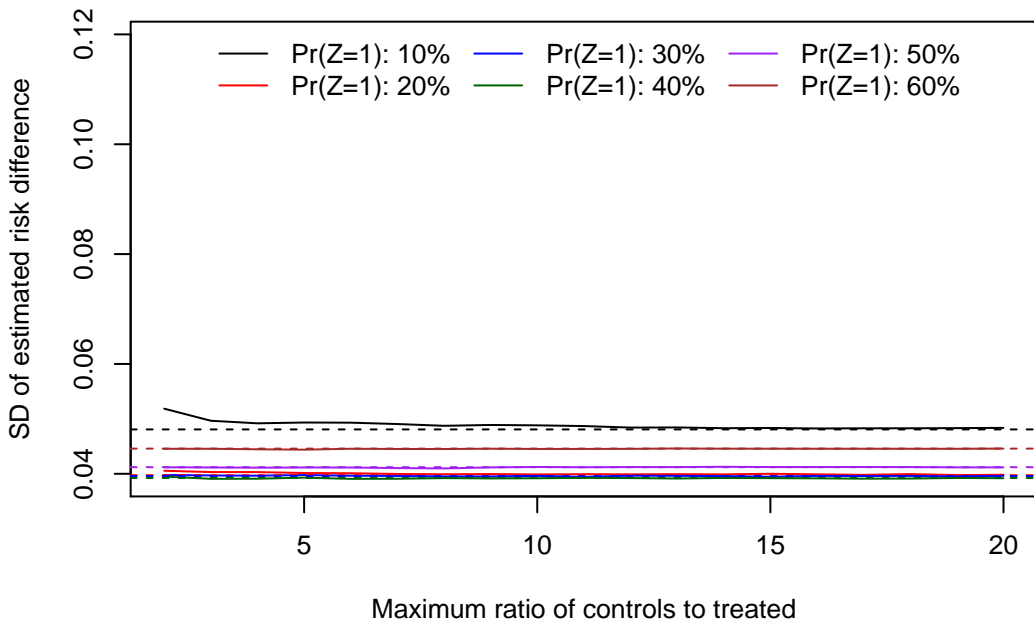

Multiplier = 2

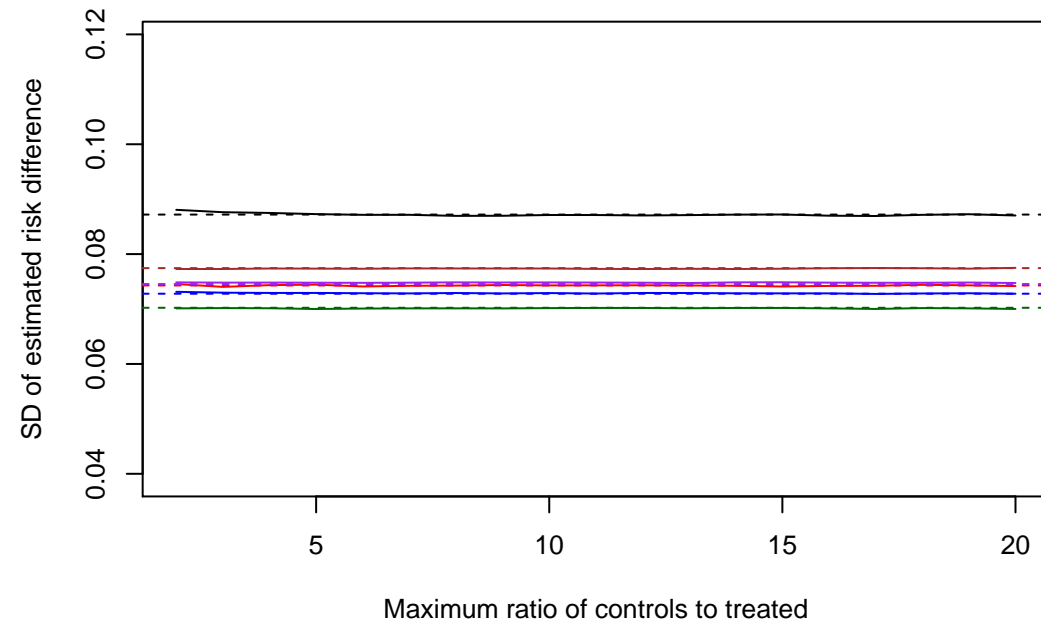

Multiplier = 3

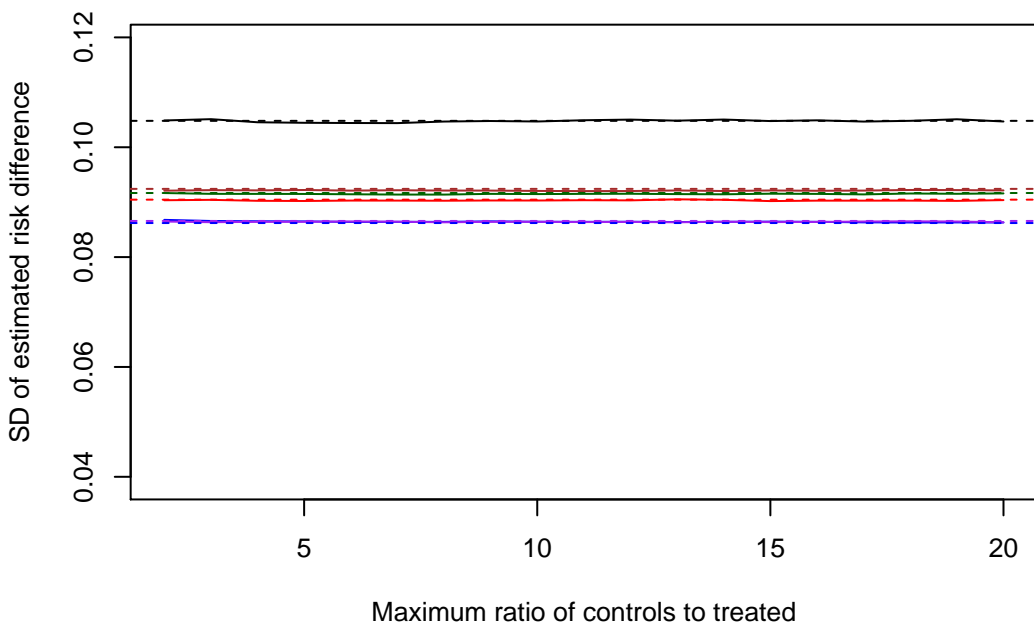

Multiplier = 4

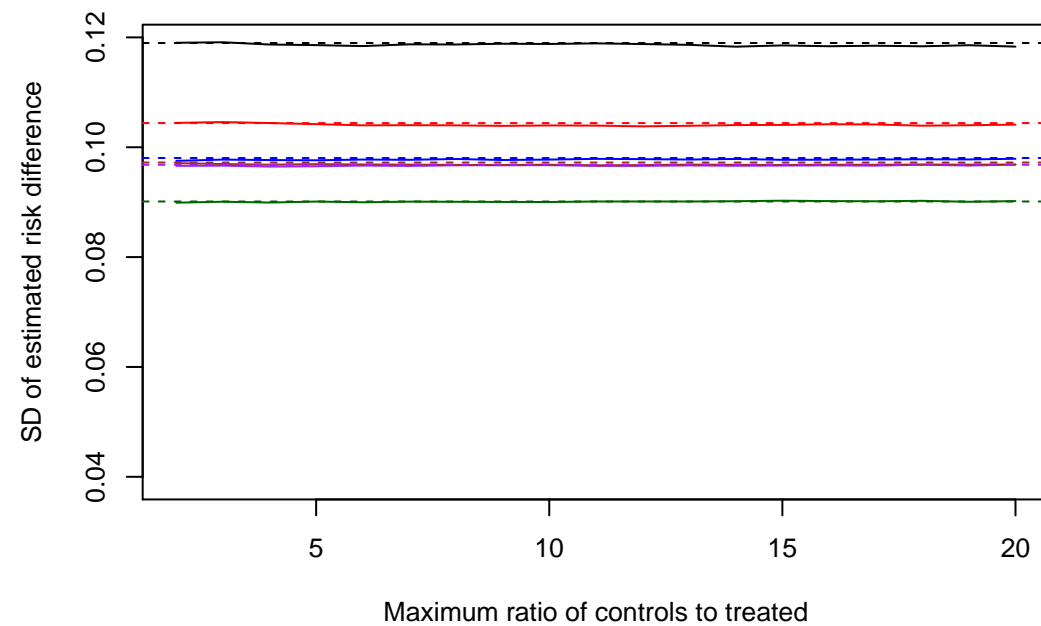

Figure A20. MSE of estimated risk difference (no calipers) (N = 1000 & RD = -0.04)

Multiplier = 1

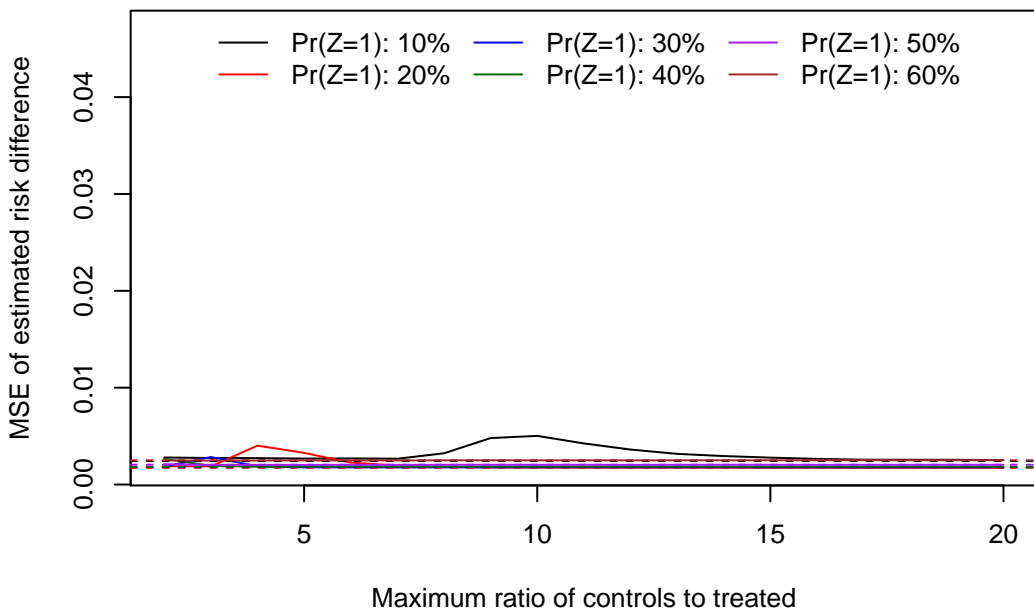

Multiplier = 2

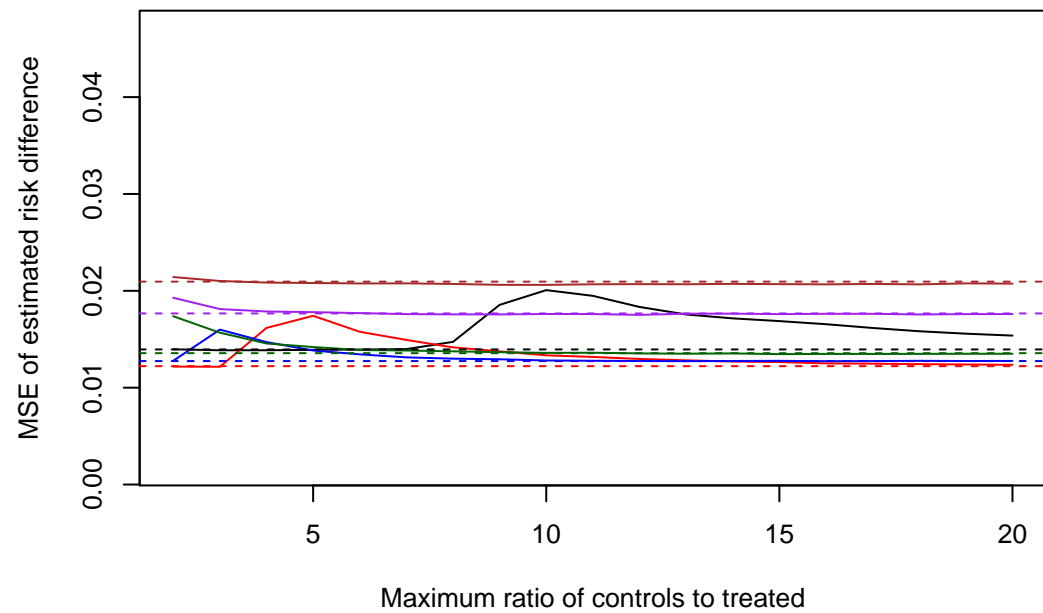

Multiplier = 3

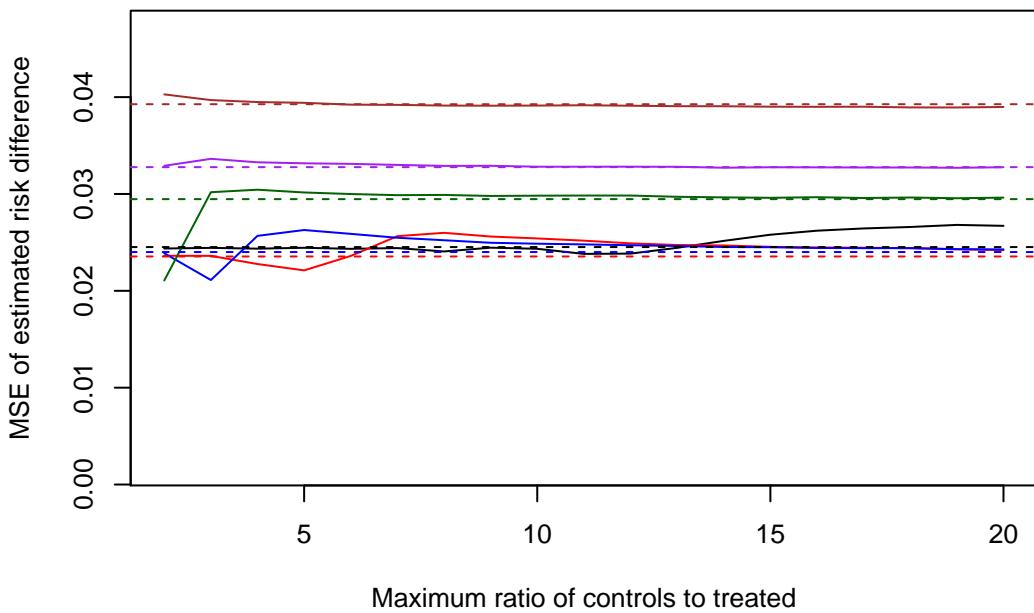

Multiplier = 4

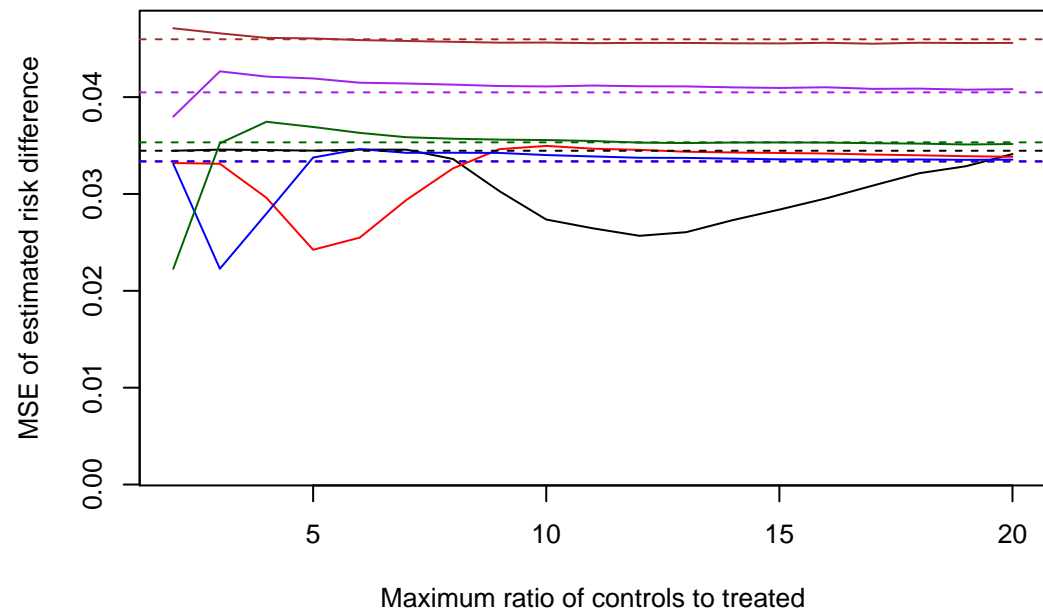

Figure A21. MSE of estimated risk difference (with calipers) (N = 1000 & RD = -0.04)

Multiplier = 1

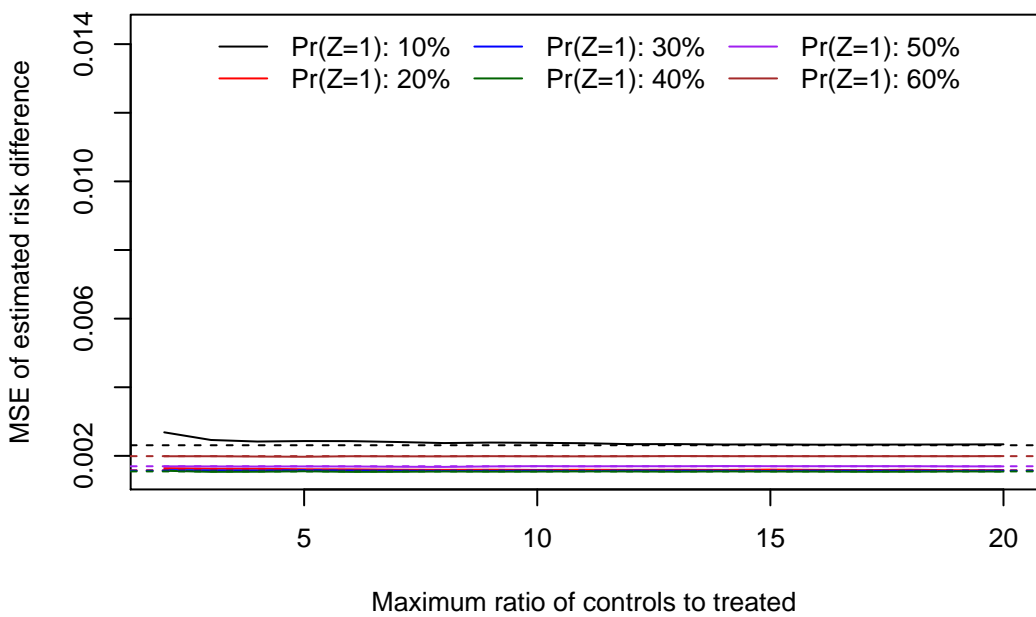

Multiplier = 2

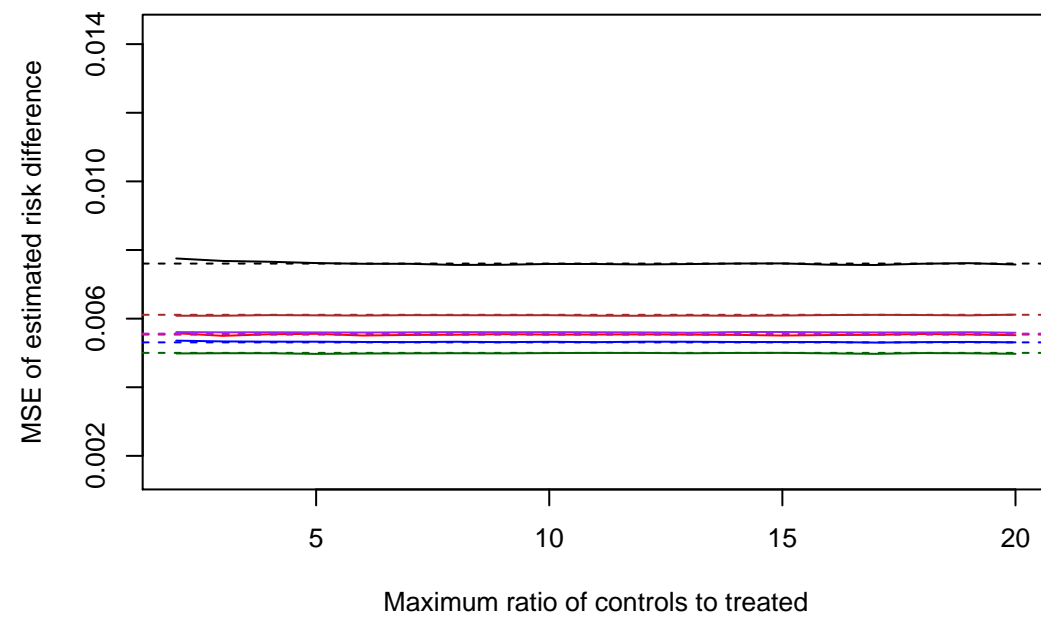

Multiplier = 3

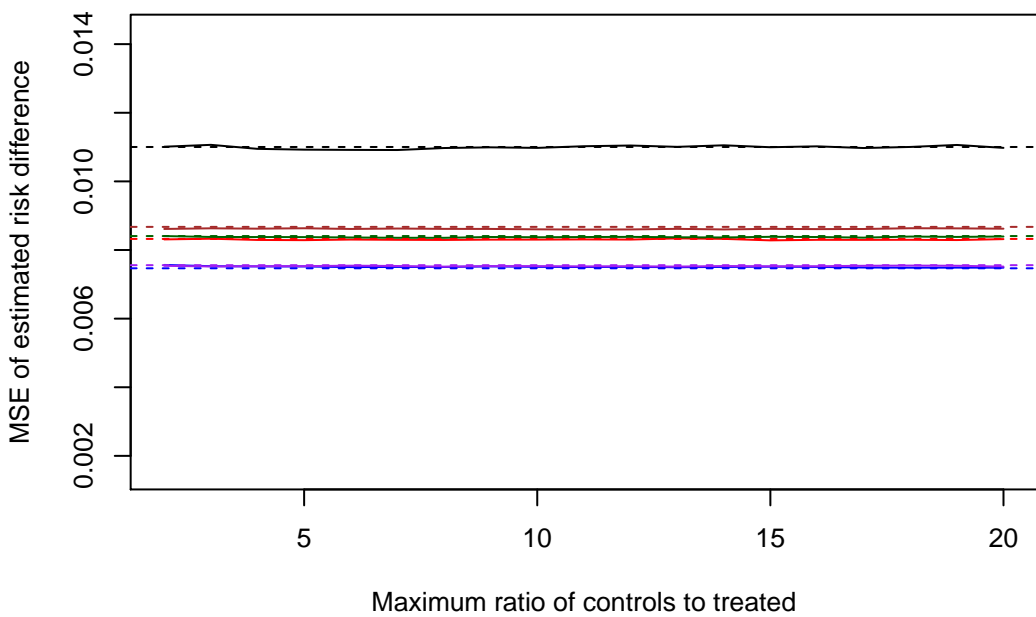

Multiplier = 4

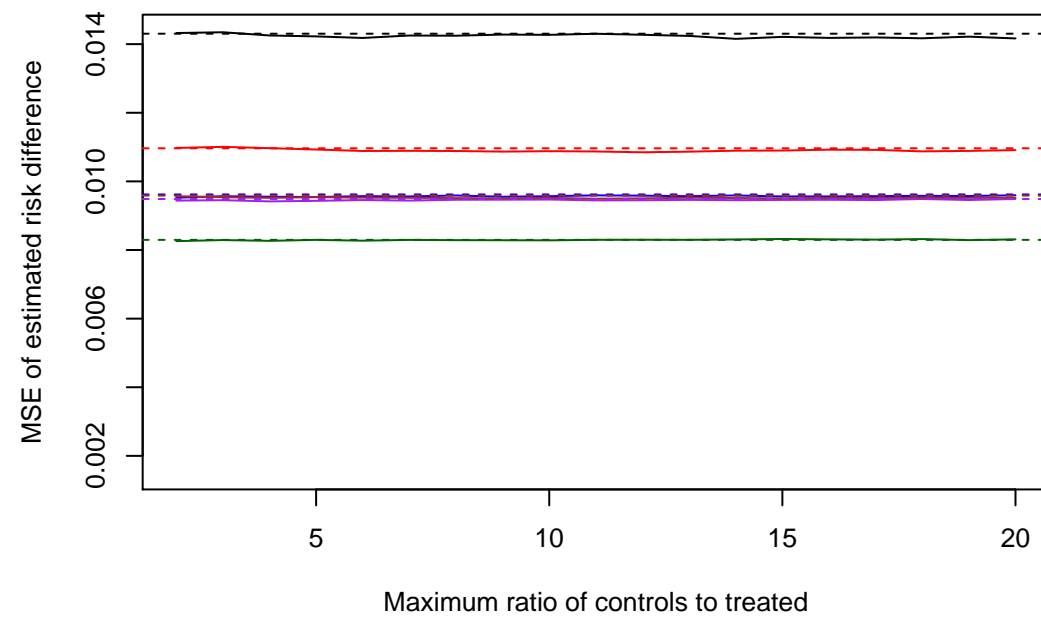

Figure A22. Relative bias (%) in estimated risk difference (no calipers) (N = 500 & RD = -0.02)

Multiplier = 1

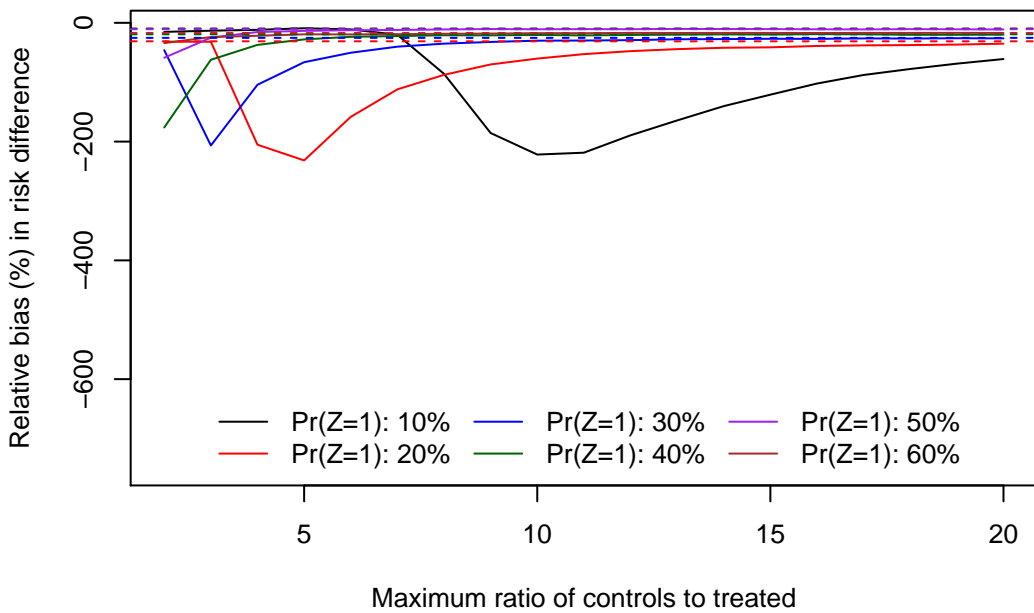

Multiplier = 2

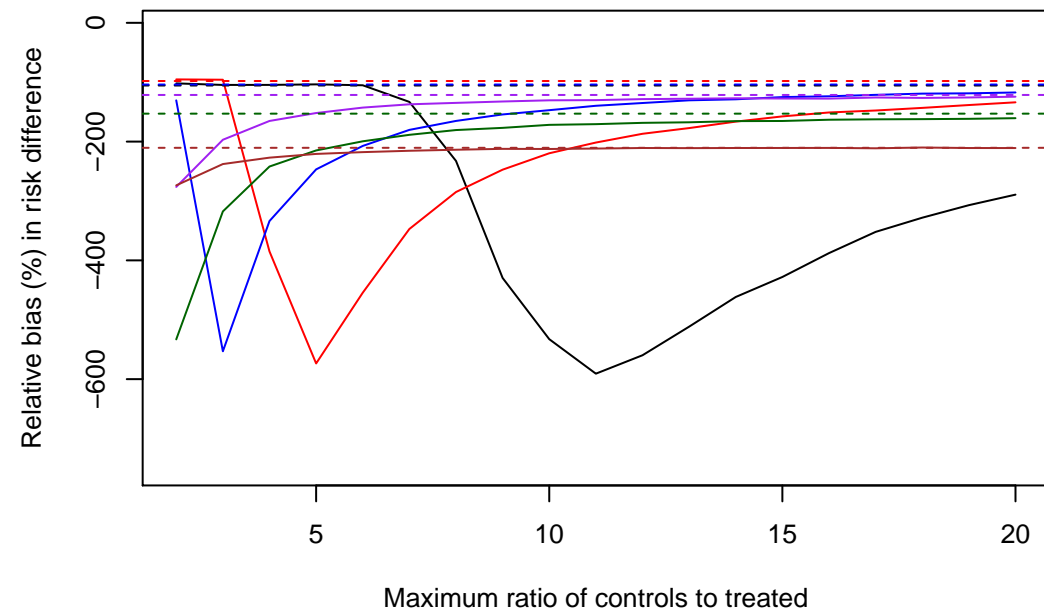

Multiplier = 3

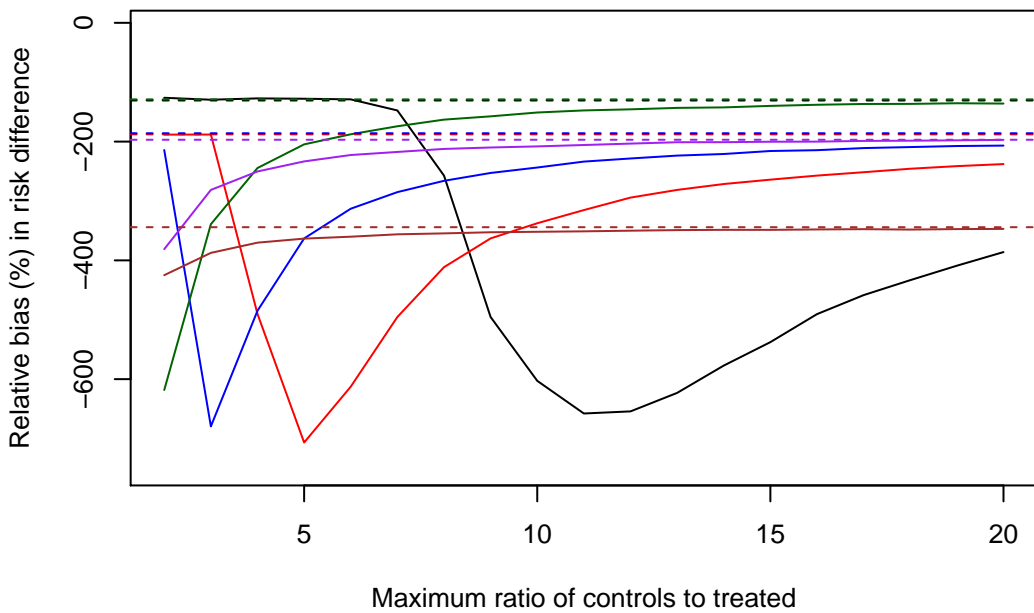

Multiplier = 4

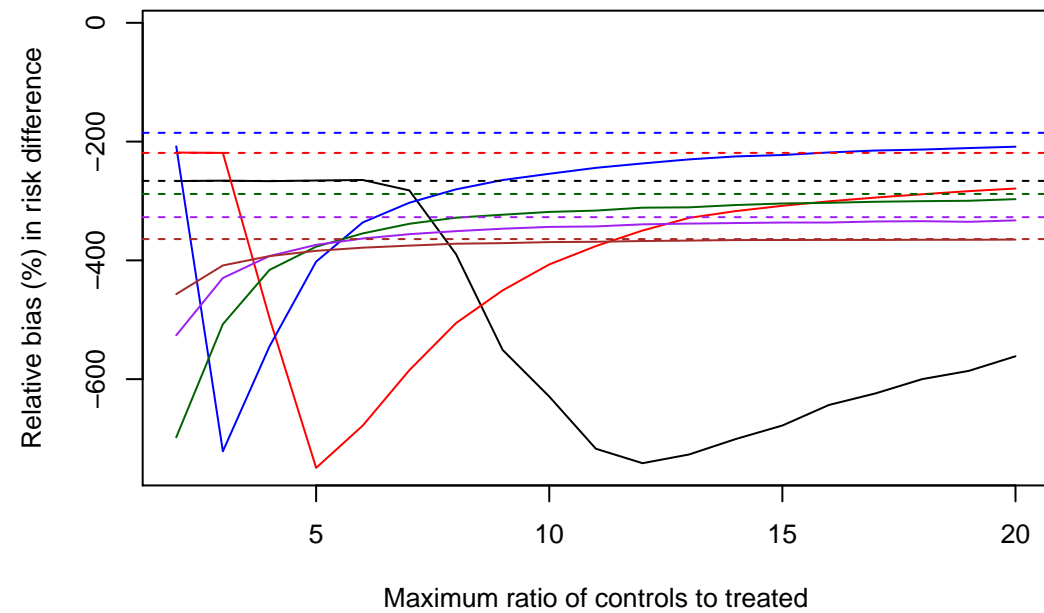

Figure A23. Relative bias (%) in estimated risk difference (with calipers) (N = 500 & RD = -0.02)

Multiplier = 1

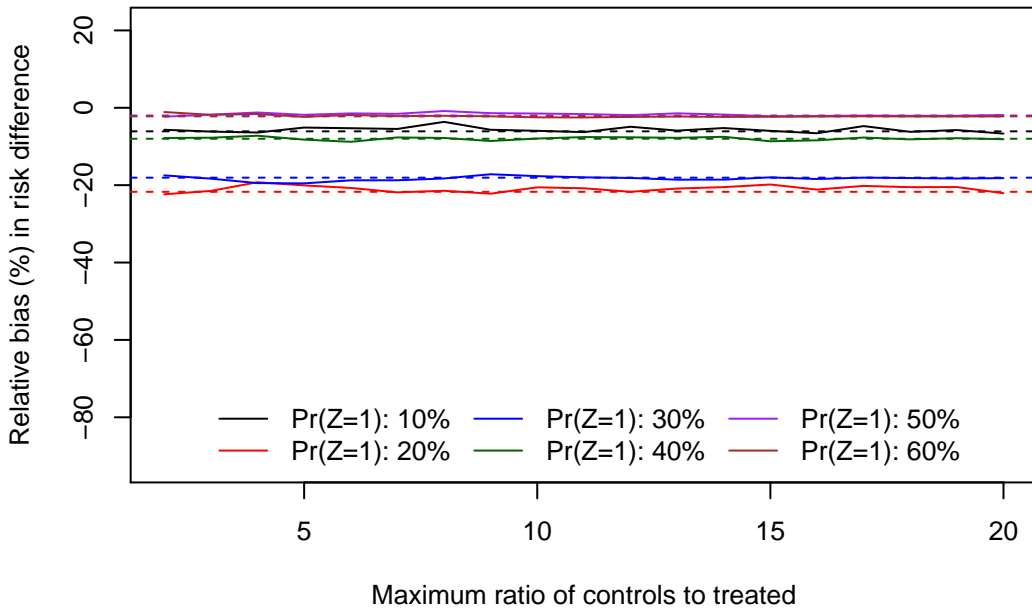

Multiplier = 2

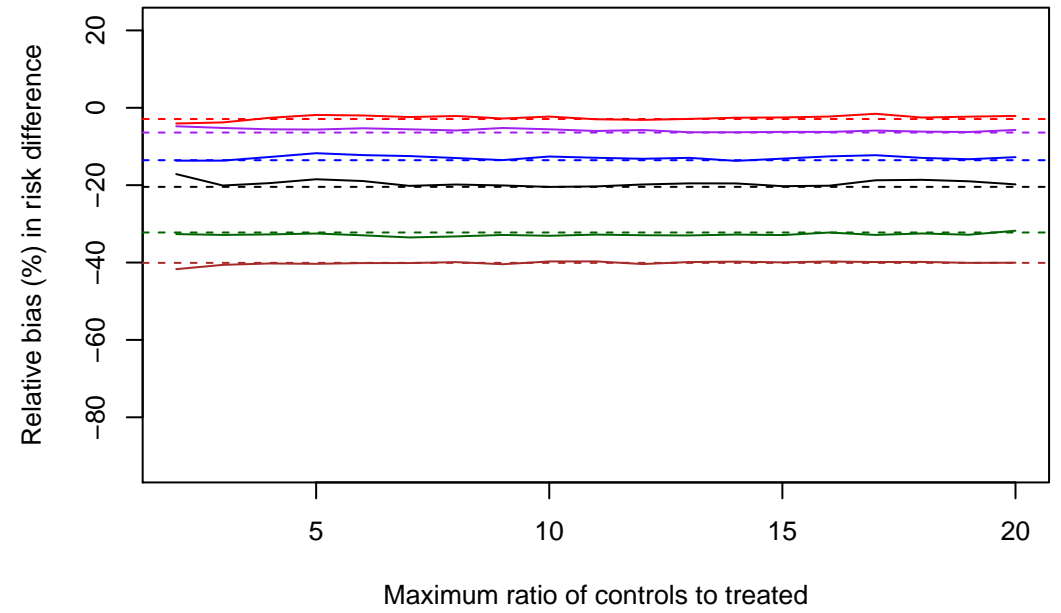

Multiplier = 3

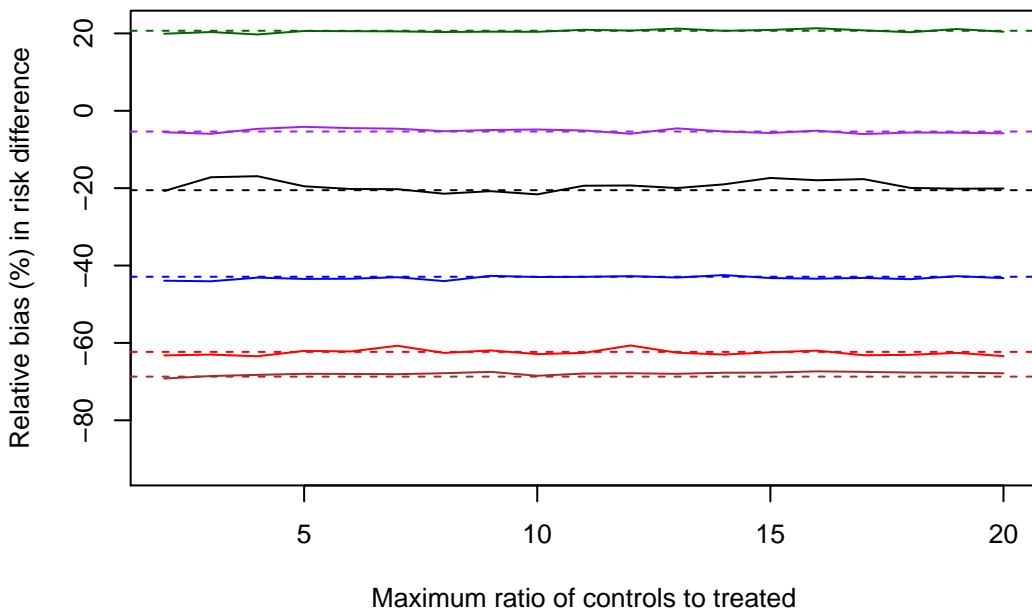

Multiplier = 4

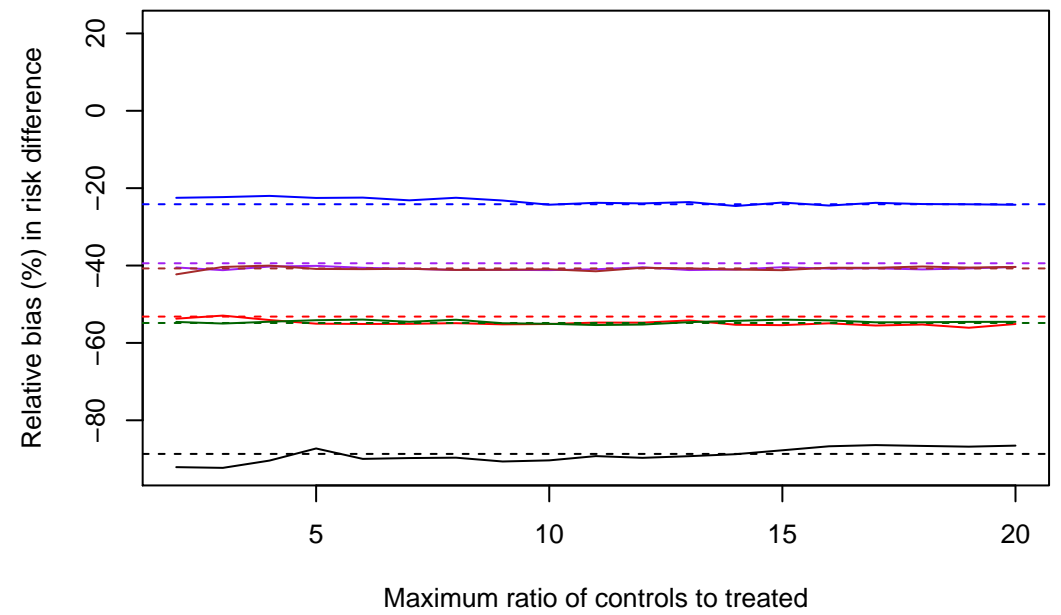

Figure A24. Standard deviation of estimated risk difference (no calipers) (N = 500 & RD = -0.02)

Multiplier = 1

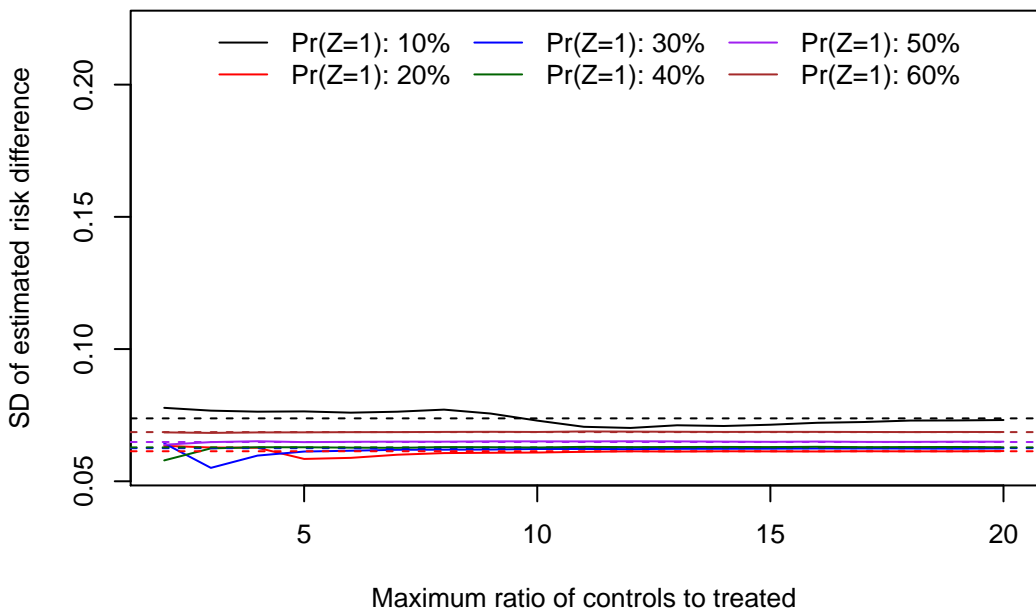

Multiplier = 2

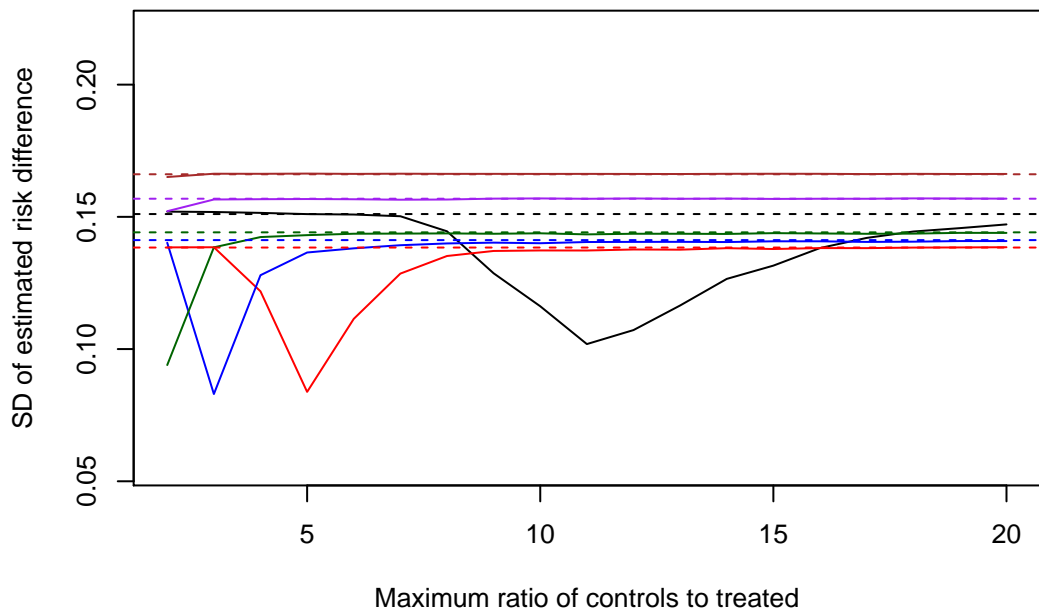

Multiplier = 3

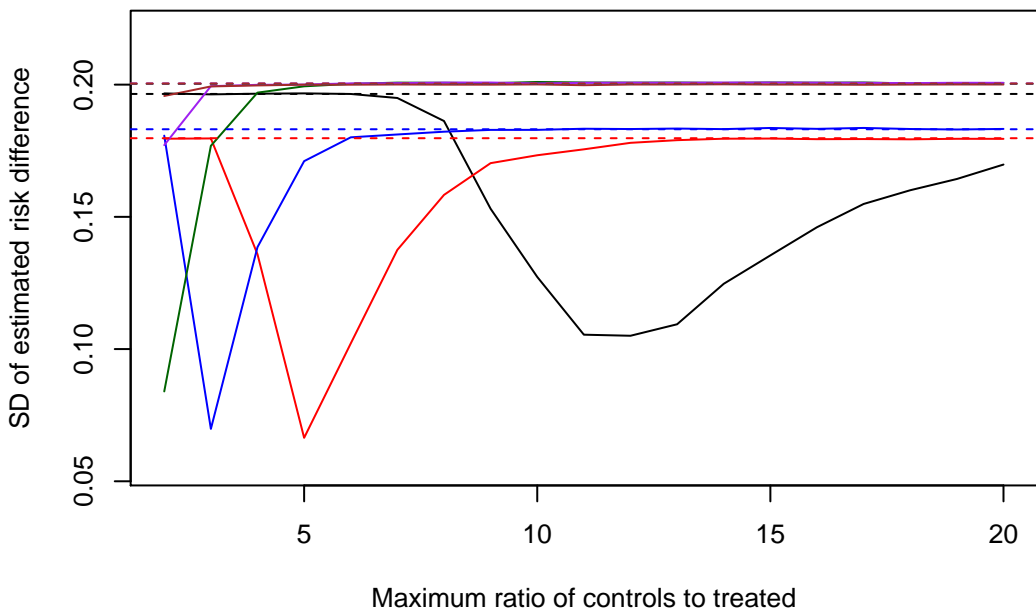

Multiplier = 4

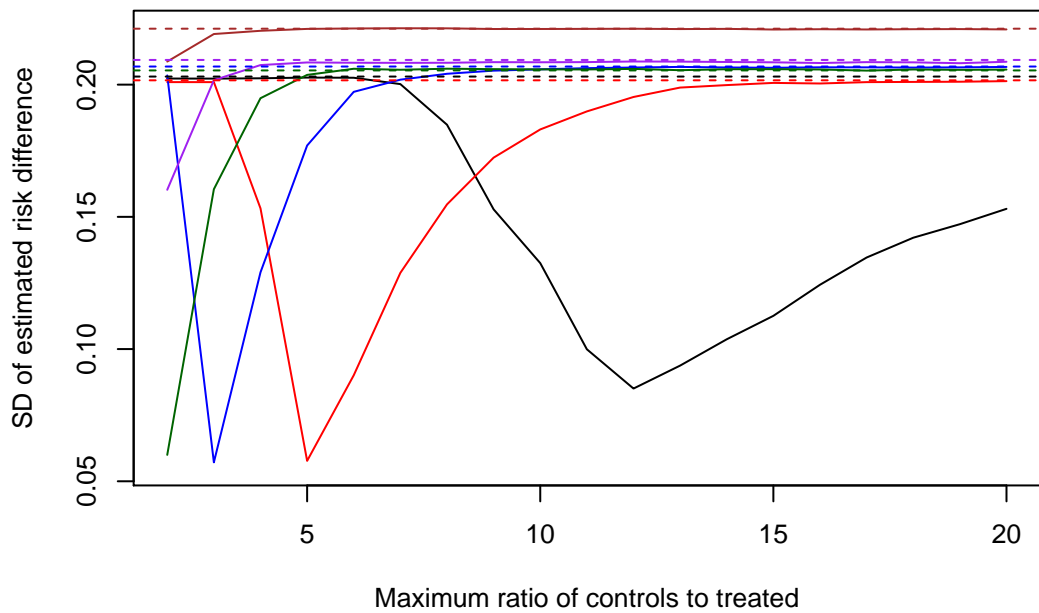



Figure A25. Standard deviation of estimated risk difference (with calipers) (N = 500 & RD = -0.02)

Multiplier = 1

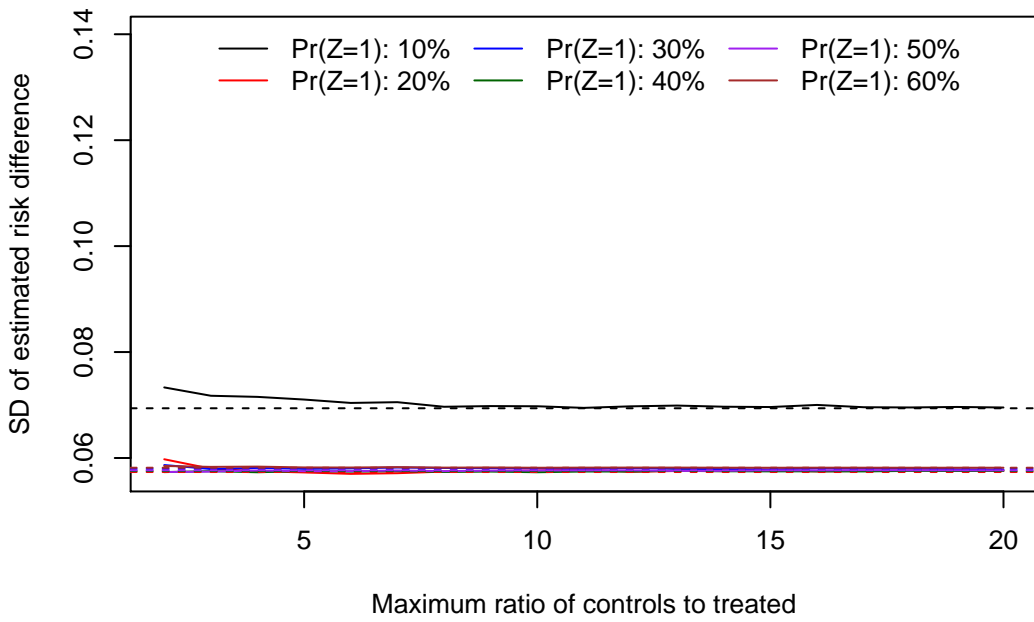

Multiplier = 2

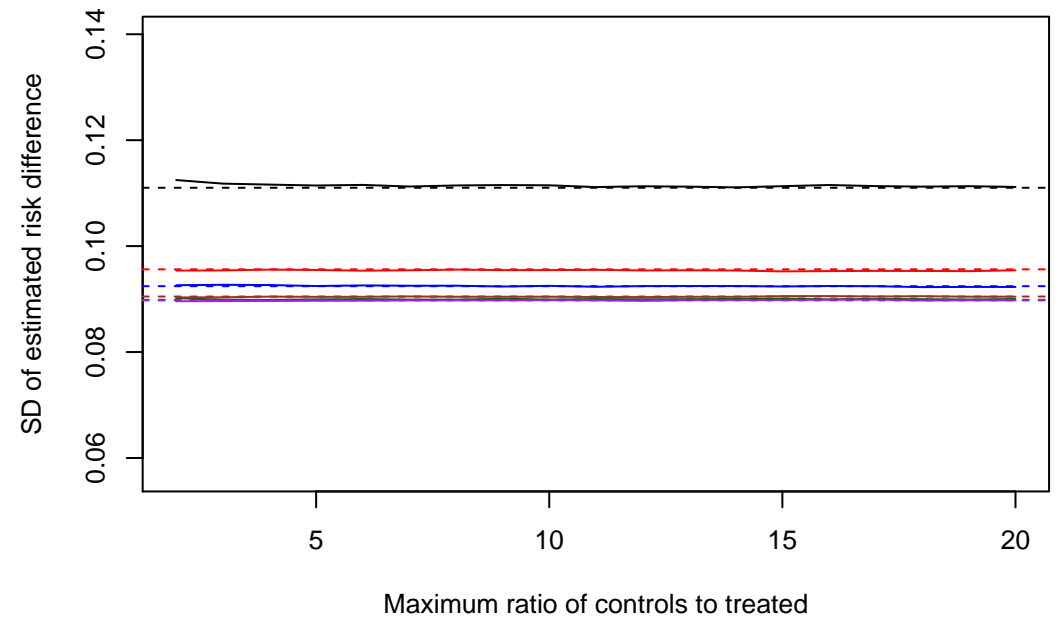

Multiplier = 3

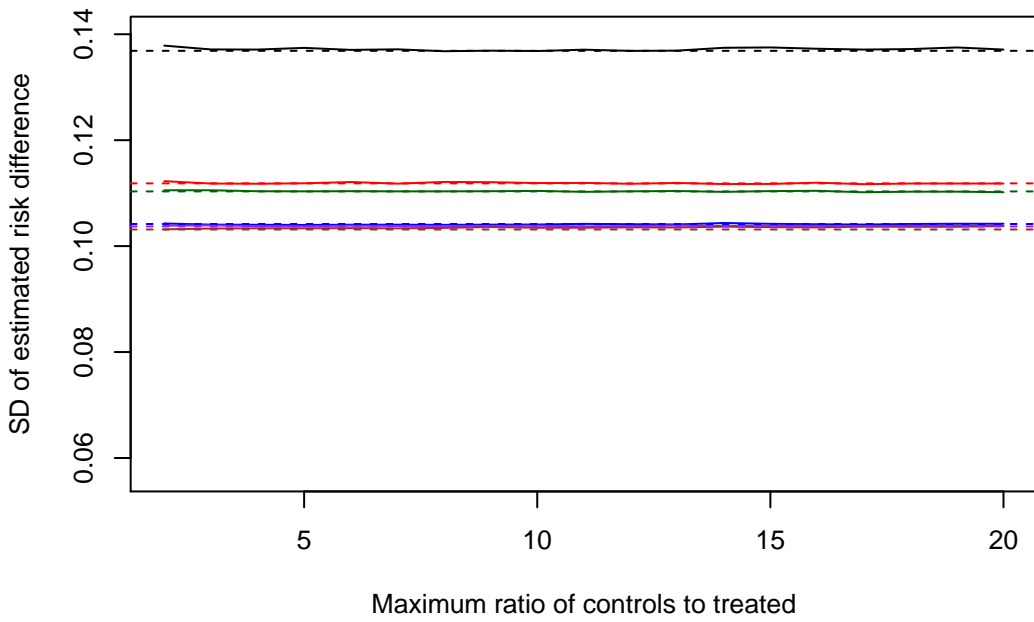

Multiplier = 4

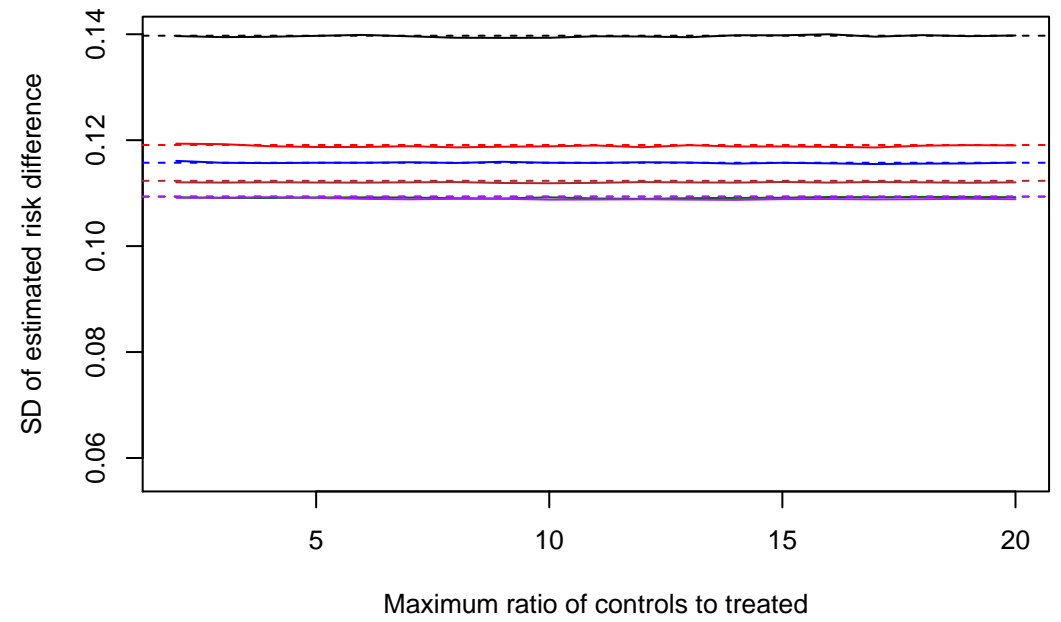

Figure A26. MSE of estimated risk difference (no calipers) (N = 500 & RD = -0.02)

Multiplier = 1

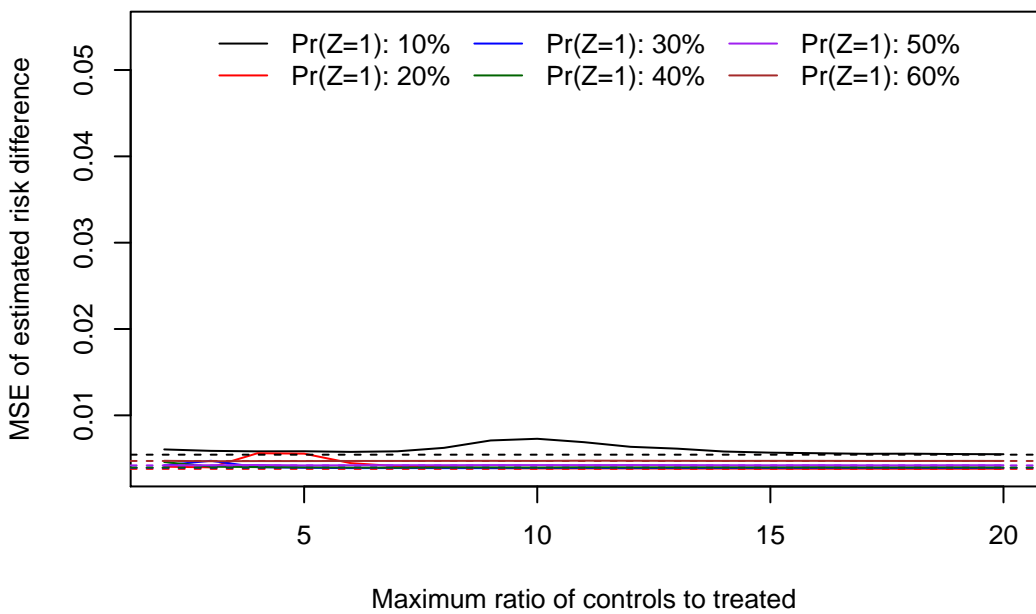

Multiplier = 2

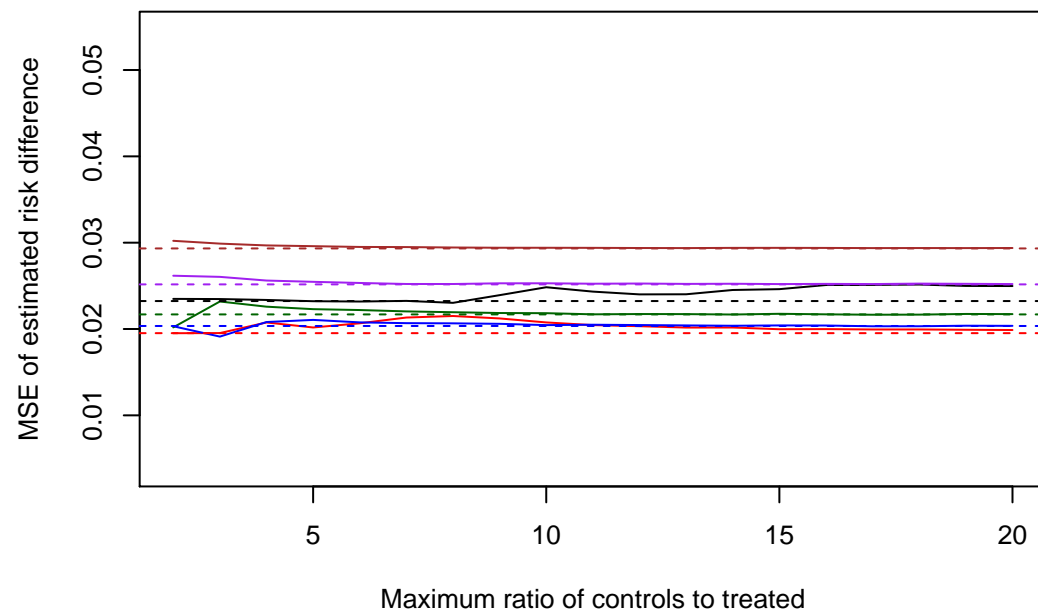

Multiplier = 3

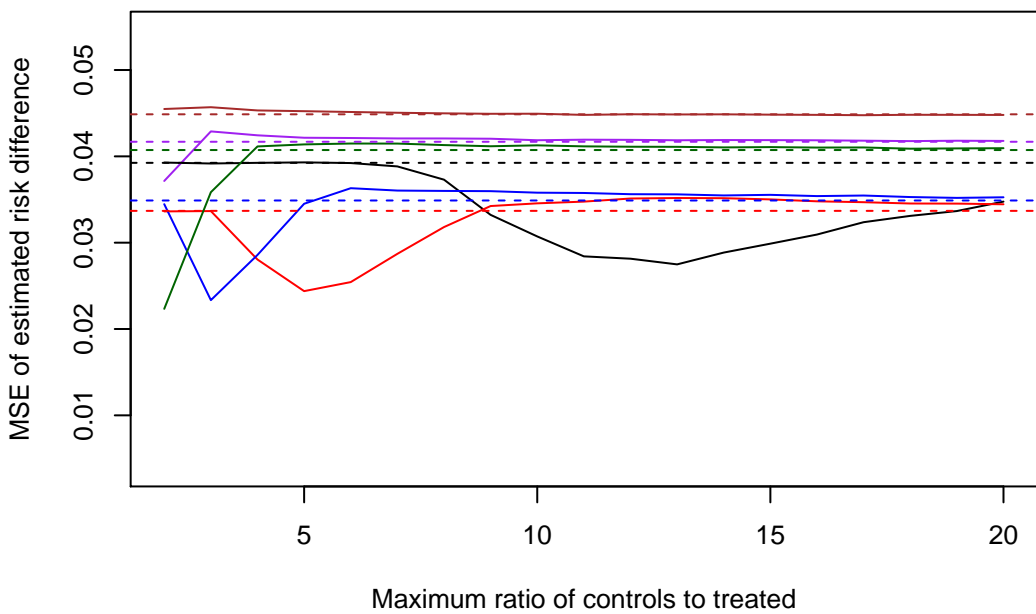

Multiplier = 4

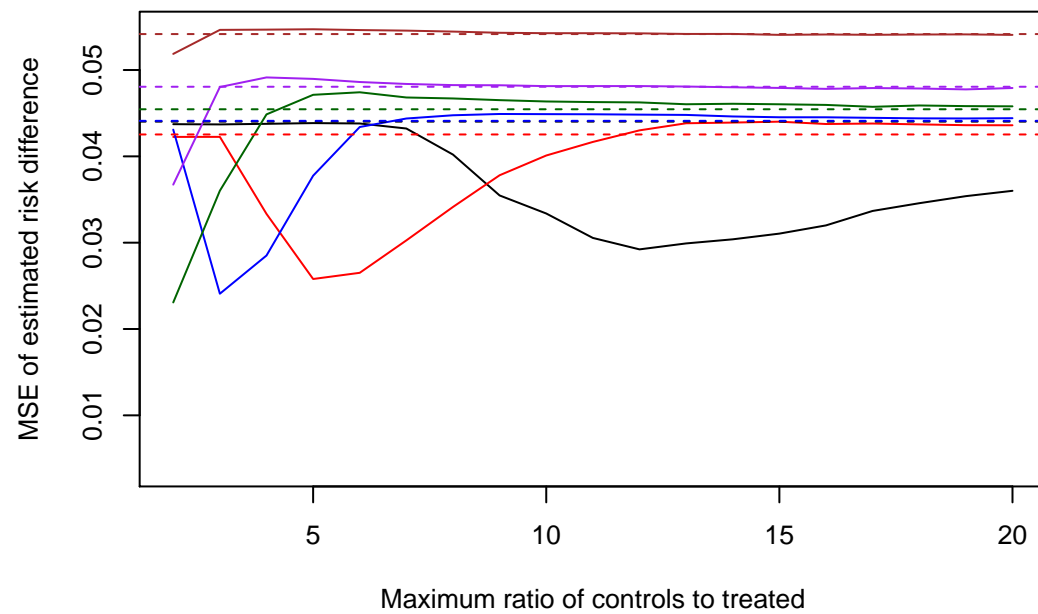

Figure A27. MSE of estimated risk difference (with calipers) (N = 500 & RD = -0.02)

Multiplier = 1

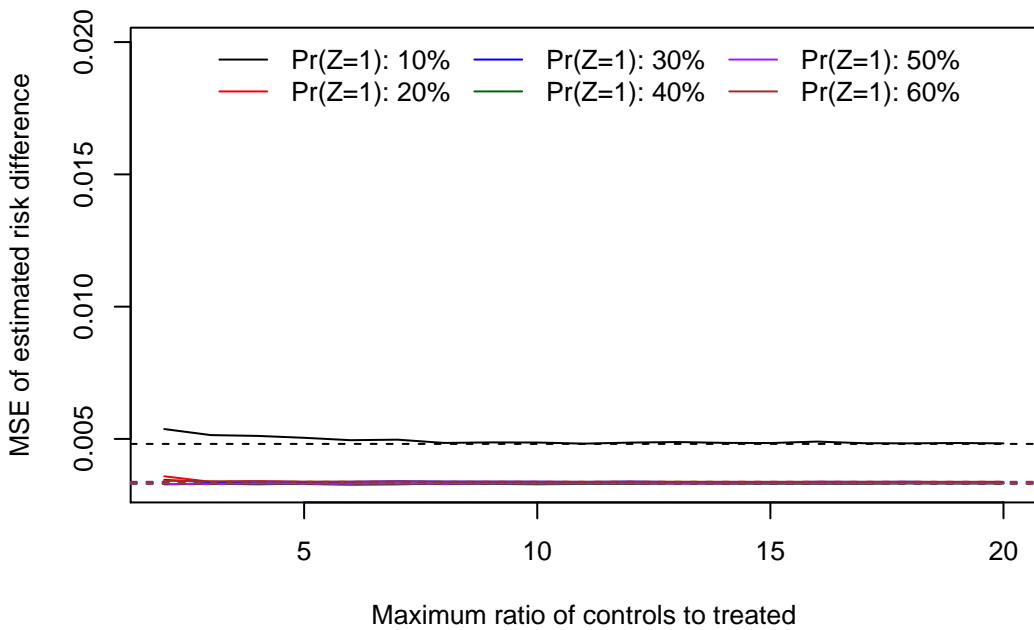

Multiplier = 2

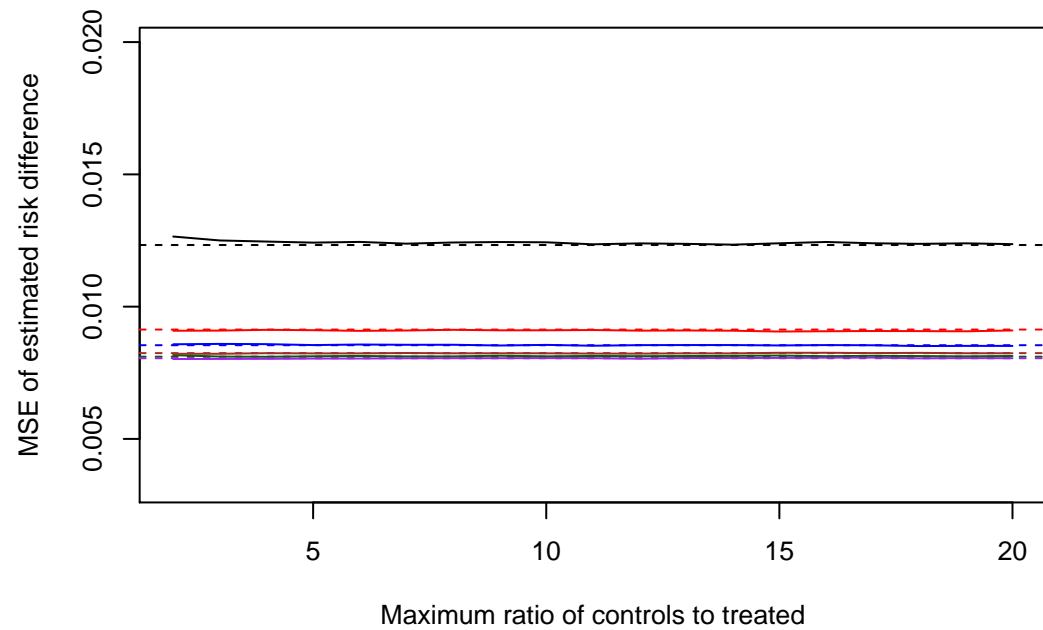

Multiplier = 3

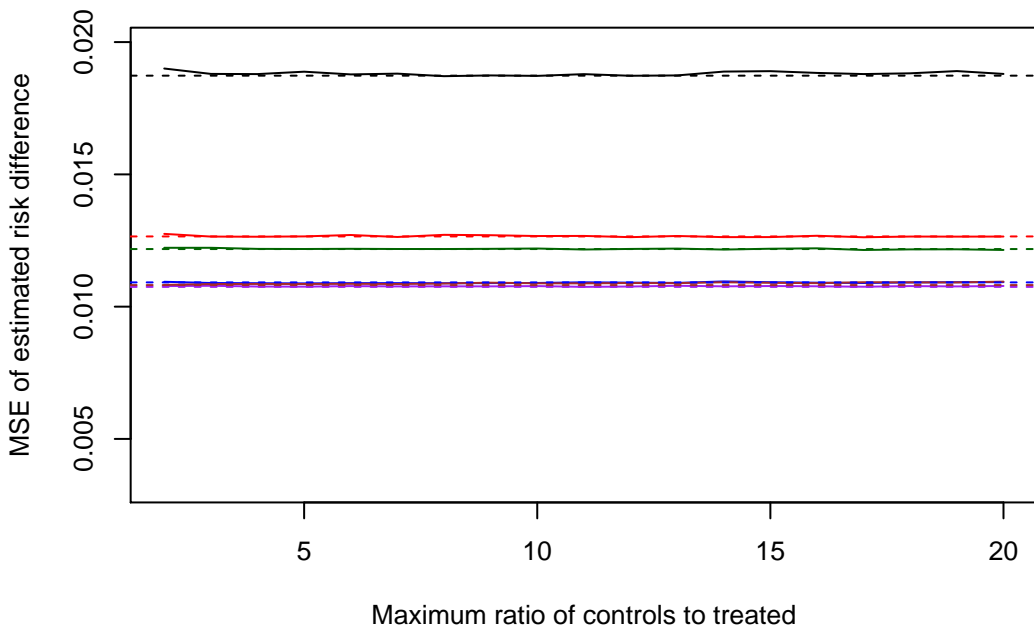

Multiplier = 4

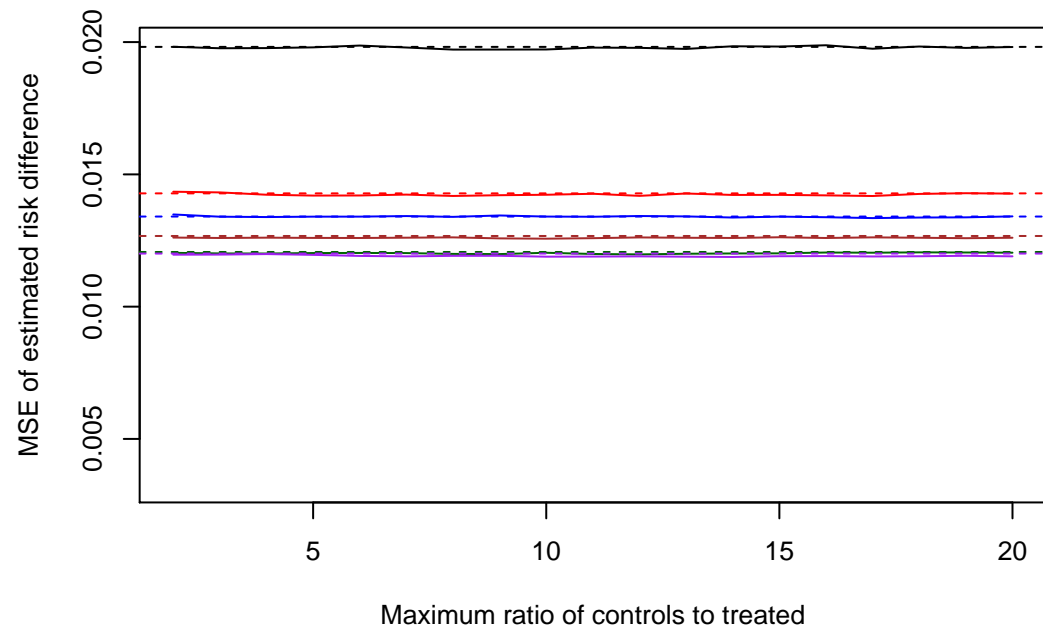

Supplement: SIM-40-101-s001.pdf [file SIM-40-101-s001.pdf]
